# Supplementary material for: Association between triglyceride glycemic index and ejection fraction preserved heart failure in hypertensive patients
Source: PeerJ journal article supplement (doi:10.7717/peerj.18220), 2024-10-04
Supplement: data_for_tyg.xlsx [file data_for_tyg.xlsx]

## Sheet: Sheet1
number	TyGIndex	HFpEF	Sex	Nation	Smoking history	History of alcohol consumption	History of diabetes	History of cardiovascular disease	Family history of hypertension	ACEIARB	CCB	B-blockers	Antiplatelet	Diuretics	Age	Height	Weight	BMI	SBP	DBP	Glu	TG	TC	HDL	LDL	BUN	UA	Cr	Sinusofaorta	Aorticring	LA	LVEDd	LVESd	IVSD	PWT	RVOT	RV	RA	PA	MVE	MVA	MVEA	FS	SV	CO	LVM	Ee	LVMI	EF
1	11.1927	1	male	Kazak	YES	NO	NO	YES	NO	YES	NO	YES	YES	YES	61	178	110	34.7183	123	72	15.69	5.8	2.54	0.84	2.25	6.26	195.6	63.54	30	20	40	5.5	3.8	1.3	1.2	28	19	35	24	0.45	0.68	0.66	32.69	78.64	5.66	345.85	5.74	149.855	65.16
2	11.1845	0	female	Other	NO	NO	NO	NO	NO	YES	NO	NO	NO	NO	62	178	110	34.7184	123	72	17.03	5.3	4.6	0.84	3.89	6.26	195.6	63.54	30	20	40	5.2	3.5	1	0.9	28	19	35	24	0.45	0.68	0.66	32.69	78.64	5.66	212.395	5.74	92.0296	60.72
3	11.1463	1	male	Han	YES	YES	NO	YES	YES	YES	NO	NO	NO	NO	58	160	65	25.3913	155	91	17.34	5.01	3.35	0.64	4.19	6.96	375.54	119.15	26	20	29	4.7	3.1	1.1	1.1	25	17	27	26	0.66	0.85	0.78	36.36	58.14	4.24	220.073	9.25	134.552	62.95
4	11.0769	0	male	Han	YES	YES	NO	NO	NO	YES	NO	YES	NO	NO	56	163	77	28.9814	120	67	19.53	4.15	4.02	0.95	2.83	6.76	246.37	52.67	29	20	31	4.3	2.7	1	1	28	18	30	19	1.03	1.14	0.9	37.21	56.05	3.98	163.762	11.44	90.782	67.47
5	11.0596	0	female	Other	NO	NO	NO	NO	NO	NO	NO	NO	NO	NO	62	178	110	34.7187	123	72	15.03	5.3	4.5	0.84	4.67	6.26	195.6	63.54	30	20	40	5.2	3.5	1	0.9	28	19	35	24	0.45	0.68	0.66	32.69	78.64	5.66	212.395	4.74	92.0296	60.72
6	11.0194	0	male	Kazak	NO	NO	NO	YES	NO	NO	NO	YES	NO	YES	54	165	85	31.2218	145	78	14.17	5.4	4.24	0.94	3.27	4.2	269.9	65	30	18	30	5	3.3	0.9	0.9	27	16	31	21	0.59	0.78	0.76	34	74.11	5.85	183.409	8.38	95.7201	62.68
7	11.0119	0	female	Other	NO	NO	NO	NO	NO	NO	NO	NO	NO	NO	78	160	65	25.3915	155	91	16.84	4.51	3.85	0.64	2.51	6.96	375.54	119.15	26	20	29	4.4	2.8	0.8	0.8	25	17	27	26	0.66	0.85	0.78	36.36	58.14	4.24	122.449	9.25	74.8647	66.3
8	10.8593	0	male	Han	YES	YES	NO	NO	NO	YES	NO	YES	NO	NO	56	163	77	28.9817	120	67	15.71	4.15	2.25	0.95	2.64	6.76	246.37	52.67	29	20	31	4.3	2.7	1	1	28	18	30	19	1.03	1.14	0.9	37.21	56.05	3.98	163.762	11.44	89.6342	67.47
9	10.8513	0	female	Han	NO	NO	YES	YES	NO	YES	NO	NO	NO	NO	57	178	88	27.7747	147	77	13.2	4.9	5.17	0.7	1.73	5.3	280	85	35	20	34	5.1	3.4	0.9	0.9	30	20	35	23				33.33	76.37	5.42	190.092	6.33	92.3092	61.68
10	10.8268	0	female	Other	NO	NO	NO	NO	NO	NO	NO	NO	NO	NO	78	160	65	25.3908	155	91	15.74	4.01	5.05	0.64	2.63	6.96	375.54	119.15	26	20	29	4.4	2.8	0.8	0.8	25	17	27	26	0.66	0.85	0.78	36.36	58.14	4.24	122.449	8.25	74.8647	66.3
11	10.8031	0	female	Other	NO	NO	NO	NO	NO	NO	YES	NO	NO	NO	53	160	62	24.2196	150	72	7.48	8.24	2.77	1.4	3.05	8.3	390.2	79.3	33	17	35	4.6	3.1	0.9	0.9	27	18	34	23	0.62	0.74	0.84	32.61	59.42	4.63	157.8	7.29	97.6064	61.04
12	10.7974	0	female	Han	NO	NO	NO	NO	NO	NO	NO	NO	NO	NO	59	155	60	24.9744	171	83	7.52	8.15	3.5	1.23	1.3	3.6	241.7	52.9	35	21	29	4.2	2.8	0.8	0.8	32	23	30	17	0.67	0.85	0.79	33.33	49.03	4.12	112.265	7.93	72.7765	62.4
13	10.759	1	male	Other	NO	NO	YES	YES	YES	YES	YES	NO	YES	YES	51	178	75	23.6714	133	80	14.35	4.11	3.18	0.88	1.27	6.5	420	94	34	20	35	4.8	3.2	1.3	1.3	30	20	36	23	0.85	0.62	1.37	33.33	66.56	5.19	292.817	8.08	156.553	61.9
14	10.7373	0	female	Uygur	NO	NO	NO	NO	NO	YES	NO	NO	NO	NO	68	182	96	28.9829	137	74	12.15	4.75	3.06	0.92	2.75	6.75	314.89	75.01	31	23	41	5.4	3.6	1	0.1	32	21	32	20	0.56	0.77	0.73	29.41	69.38	4.16	108.247	6.22	49.5162	56.04
15	10.6975	0	male	Han	YES	NO	YES	YES	NO	NO	NO	NO	YES	NO	67	167	78	27.9685	168	75	14.48	3.83	3.06	0.71	2.58	5.44	366.73	66.72	36	23	31	4.7	3.1	1.3	1.2	30	19	37	21	0.65	0.72	0.9	34.04	64.44	4.19	266.602	9.07	143.012	62.95
16	10.6922	0	female	Han	NO	NO	NO	YES	NO	NO	YES	YES	YES	NO	75	168	73	25.8654	180	101	12.77	4.32	5.16	0.53	3.03	6.6	345	79	35	21	34	4.9	3.2	1	1	29	20	35	24	0.52	0.73	0.71	34.69	71.85	5.75	205.694	5.47	113.876	63.69
17	10.6758	1	male	Han	YES	YES	YES	YES	YES	YES	YES	YES	YES	NO	58	178	78	24.6187	158	78	11.03	4.92	2.88	0.7	2.54	24.99	514.28	1180.13	35	20	41	5.4	3.5	1	1	27	21	36	24	0.48	0.69	0.7	35.19	90.44	6.69	244.07	6.47	127.926	64
18	10.6541	1	male	Kazak	NO	NO	NO	NO	YES	NO	YES	YES	YES	NO	40	167	78	27.9688	156	91	5.94	8.94	2.95	0.7	1.03	1.8	402	99.7	33	22	46	4.6	3	1.3	1.3	29	20	35	25	0.87	0.53	1.64	34.78	62.034	4.55	273.348	9.29	148.494	64.04
19	10.654	0	female	Han	NO	NO	YES	YES	NO	YES	NO	NO	NO	NO	57	178	88	27.7748	147	77	11.8	4.5	6.53	0.7	2.49	5.3	280	85	35	20	34	5.1	3.4	0.9	0.9	30	20	35	23	1.25		1.32	33.33	76.37	5.42	190.092	12.6	93.508	61.68
20	10.6503	0	female	Other	NO	NO	NO	NO	NO	NO	YES	NO	NO	NO	53	160	62	24.2195	150	72	6.58	8.04	5.59	1.4	2.35	8.3	390.2	79.3	33	17	35	4.6	3.1	0.9	0.9	27	18	34	23	0.62	0.74	0.84	32.61	59.42	4.63	157.8	8.29	98.7425	61.04
21	10.645	1	male	Han	NO	NO	YES	NO	YES	YES	YES	YES	NO	NO	61	165	60	22.0389	183	92	11.54	4.56	4.24	1.25	5.08	8.5	576	96	51	31	69	5	3.1	1.1	1.1	42	25	52	30	0.82	0.99	0.83	37.25	8285	10.19	244.578	7.43	152.518	66.92
22	10.6231	0	male	Kazak	YES	YES	NO	YES	NO	YES	NO	YES	YES	NO	66	166	78	28.3063	129	84	18.52	2.78	2.9	0.69	2.7	4.6	254.4	90.5	33	20	33	4.9	3.2	0.9	0.9	30	18	31	24	0.65	0.92	0.71	34.69	71.85	5.46	176.839	9.29	95.1717	63.69
23	10.6183	0	male	Han	NO	NO	NO	NO	NO	YES	NO	NO	NO	NO	54	176	78	25.1811	161	92	9.35	5.48	3.35	0.77	2.06	4.6	266.2	79.3	32	19	36	5	3.3	0.9	0.9	30	18	36	22	0.59	0.67	0.88	34	74.11	6	183.409	7.56	96.7502	62.68
24	10.6069	0	male	Han	YES	NO	YES	YES	NO	NO	NO	NO	NO	NO	67	167	78	27.9682	168	75	13.58	3.73	4.15	0.71	2.8	5.44	366.73	66.72	36	23	31	4.7	3.1	1.3	1.2	30	19	37	21	0.65	0.72	0.9	34.04	64.44	4.19	266.602	8.29	144.829	62.95
25	10.5107	0	female	Uygur	NO	NO	NO	NO	NO	YES	NO	NO	NO	NO	68	182	96	28.9828	137	74	11.95	3.85	4.08	0.92	3.45	6.75	314.89	75.01	31	23	41	5.4	3.6	1	0.1	32	21	32	20	0.56	0.77	0.73	29.41	69.38	4.16	108.247	7.22	50.1773	56.04
26	10.4715	0	male	Kazak	NO	NO	NO	NO	YES	NO	NO	NO	NO	NO	47	173	72	24.0579	132	91	5.86	7.55	2.83	0.65	2.78	7.3	407.1	100	34	19	31	4.8	3.1	1	1	24	17	33	22	0.97	0.8	1.21	35.42	69.6	5.08	198.394	10.7	110.072	64.73
27	10.4652	1	male	Han	YES	YES	YES	NO	YES	YES	NO	NO	NO	NO	59	180	88	27.1615	171	93	8.39	5.24	3.02	0.63	1.51	32.2	550	772	31	20	42	5.5	3.9	1.1	1	29	17	33	24	0.8	1.07	0.75	29.09	81.51	5.87	269.905	8.36	131.976	55.29
28	10.4605	0	female	Han	NO	NO	NO	YES	NO	NO	NO	YES	YES	NO	66	160	61	23.8289	131	72	8.84	4.95	3.37	0.72	2.09	6	233	38	35	18	33	4.5	2.8	0.9	0.9	24	13	30	17	0.99	1.09	0.91	37.78	62.9	5.66	151.679	5.75	94.5688	68.04
29	10.4471	1	male	Uygur	YES	YES	YES	YES	NO	YES	NO	YES	YES	NO	37	165	86	31.5891	101	67	18.53	2.33	2.63	0.46	1.59	4.79	210.57	49.67	32	20	34	5.2	3.5	1.2	1.2	28	20	33	22	0.65	0.52	1.25	35	72	6.11	296.703	7.19	153.844	69.29
30	10.4322	1	male	Han	NO	NO	YES	YES	YES	NO	NO	YES	YES	NO	63	167	81	29.0442	154	78	10.25	4.15	4.86	0.88	2.87	4.6	333	76.2	32	22	40	5.1	3.4	1.1	1.1	30	20	34	25	0.49	0.79	0.62	32.69	78.64	5.82	253.021	7.53	134.707	60.72
31	10.424	1	male	Other	NO	YES	YES	NO	NO	NO	NO	NO	NO	NO	25	183	83	24.7849	166	100	11.59	3.64	2.87	0.56	3.27	2.32	309.1	77.06	33	20	36	5.4	3.7	1.2	1.2	27	20	32	23	0.95	0.59	1.7	33.33	76.37	5.73	316.172	8.6	158.015	60.19
32	10.4155	0	female	Other	YES	YES	NO	NO	YES	NO	YES	NO	YES	NO	69	169	74	25.9097	124	58	7.25	5.77	9.77	0.96	3.27	8.86	486.88	84.55	32	18	35	4.8	3.2	0.9	0.9	28	19	34	24	0.87	0.92	0.95	33.33	66.56	4.72	170.38	8.4	93.3488	61.9
33	10.3975	0	male	Kazak	YES	YES	NO	YES	NO	YES	NO	YES	YES	NO	66	166	78	28.307	129	84	18.02	2.28	2.9	0.69	3.02	4.6	254.4	90.5	33	20	33	4.9	3.2	0.9	0.9	30	18	31	24	0.65	0.92	0.71	34.69	71.85	5.46	176.839	10.29	96.3855	63.69
34	10.3971	0	female	Han	NO	NO	NO	YES	NO	NO	YES	YES	YES	NO	75	168	73	25.865	180	101	12.37	3.32	4.74	0.53	2.81	6.6	345	79	35	21	34	4.9	3.2	1	1	29	20	35	24	0.52	0.73	0.71	34.69	71.85	5.75	205.694	6.47	115.274	63.69
35	10.3956	1	male	Han	YES	YES	NO	NO	YES	YES	NO	NO	YES	NO	46	173	83	27.733	143	94	8.12	5.05	4.03	0.81	3.15	8.76	445.9	119.42	38	19	35	5.6	3.9	1.2	1.2	27	19	30	21	0.65	0.55	1.18	32.08	80.91	6.23	336.239	7	173.328	59.98
36	10.3869	1	male	Han	NO	YES	YES	NO	NO	YES	YES	YES	NO	NO	55	169	91	31.8617	157	69	10.37	3.92	3.35	0.52	1.11	9.7	413.72	75.51	34	18	46	6.5	4.6	1.1	1.1	32	20	38	26	0.77	0.82	0.94	28.79	121.25	10.19	385.633	8.22	191.334	54.22
37	10.3852	1	female	Uygur	NO	NO	YES	YES	NO	NO	NO	NO	YES	NO	54	160	80	31.2503	121	75	11.18	3.63	3.57	1.17	2.82	4.57	378.39	68.35	33	20	35	4.9	3.2	1	0.9	30	20	35	24	0.65	0.88	0.74	34.69	71.85	5.53	191.054	5.15	104.796	63.69
38	10.3683	1	male	Han	YES	YES	YES	NO	NO	YES	NO	NO	NO	NO	61	171	73	24.9656	146	91	12.47	3.2	5.79	1	2.95	3.9	357.4	77.8	32	18	40	5.2	3.4	1	1	25	18	33	24	0.66	0.7	0.94	34.62	82.07	6.24	228.346	9.77	126.669	63.37
39	10.3377	0	female	Uygur	NO	NO	NO	NO	YES	NO	NO	NO	NO	NO	72	178	104	32.8247	172	115	8.6	4.5	3.22	0.88	1.79	4.7	352	68	30	19	30	4.6	3	1	1	28	20	31	22	0.68	0.94	0.72	34.78	62.34	4.92	184.166	8.05	82.4786	64.04
40	10.2707	1	male	Uygur	YES	YES	NO	NO	NO	YES	YES	NO	NO	NO	47	178	84	26.5122	155	75	9.28	3.9	9.77	0.53	3.52	6.42	189.95	75.07	36	18	40	5.2	3.3	1.4	1.3	32	19	34	23	0.64	0.51	1.25	38.78	77.81	5.06	352.928	7.74	177.986	64.36
41	10.2624	0	female	Uygur	NO	NO	NO	NO	NO	NO	NO	NO	YES	NO	54	175	80	26.123	178	105	6.21	5.78	3.44	0.93	2.15	5	502.5	88.1	30	20	28	5.1	3.4	0.9	0.9	24	18	31	24	0.71	0.82	0.87	33.33	76.37	6.03	190.092	6.46	99.2857	61.68
42	10.2321	0	male	Uygur	YES	NO	NO	NO	NO	YES	NO	YES	YES	NO	60	183	83	24.7847	166	100	11.09	3.14	2.72	0.56	2.91	2.32	309.1	77.06	33	20	36	5.1	3.4	0.9	0.9	27	20	32	23	0.95	0.59	1.7	33.33	76.37	5.73	190.092	8.6	95.0034	61.68
43	10.2172	0	female	Uygur	NO	NO	YES	NO	NO	YES	NO	NO	YES	NO	77	178	84	26.512	164	84	6.78	5.06	4.38	0.62	2.15	3.22	360.5	85.4	36	22	35	4.9	3.2	0.9	0.9	25	20	34	23	0.52	0.69	0.75	34.69	71.85	5.1	176.839	6.33	88.0626	63.69
44	10.2111	0	female	Other	YES	YES	NO	NO	YES	NO	YES	NO	YES	NO	69	169	74	25.9098	124	58	6.35	5.37	3.02	0.96	2.72	8.86	486.88	84.55	32	18	35	4.8	3.2	0.9	0.9	28	19	34	24	0.87	0.92	0.95	33.33	66.56	4.72	170.38	10.88	94.4981	61.9
45	10.2081	0	female	Han	NO	NO	NO	YES	NO	YES	NO	YES	YES	NO	66	160	61	23.829	131	72	7.64	4.45	5.4	0.72	2.08	6	233	38	35	18	33	4.5	2.8	0.9	0.9	24	13	30	17	0.99	1.09	0.91	37.78	62.9	5.66	151.679	11.38	95.6602	68.04
46	10.2051	1	male	Han	NO	NO	NO	NO	NO	NO	YES	YES	NO	NO	76	165	68	24.9777	129	69	8.39	4.04	2.3	0.68	3.01	6.4	328.22	99.68	33	19	32	5.3	3.7	1.3	1.2	29	18	35	25	0.59	0.73	0.81	32	70.8	5.66	325.102	11.18	190.832	61.68
47	10.1884	0	male	Uygur	YES	YES	NO	NO	YES	NO	YES	NO	NO	NO	60	163	100	37.6381	173	91	10.01	3.33	4.4	0.92	3.58	4.4	331.6	69.4	34	21	33	4.8	3.2	0.9	0.9	31	20	32	23	0.69	1.11	0.62	33.33	66.56	4.99	170.38	6	80.315	61.9
48	10.185	1	female	Uygur	NO	NO	NO	NO	NO	NO	NO	NO	YES	NO	54	159	65	25.7118	157	97	5.89	5.64	5.43	1.29	3.92	4.3	282	59	30	18	31	4.6	3.2	0.9	0.9	27	17	32	23	0.74	0.65	1.14	30.43	56.38	4.51	157.8	6.92	96.8397	57.92
49	10.1794	0	male	Han	YES	NO	NO	YES	NO	NO	NO	YES	YES	NO	64	167	78	27.9689	156	91	4.44	7.44	4.98	0.7	1.53	1.8	402	99.7	33	22	46	4.6	3	1.3	1.3	29	20	35	25	0.87	0.53	1.64	34.78	62.034	4.55	273.348	9.29	148.494	64.04
50	10.1782	0	male	Han	NO	NO	NO	NO	YES	YES	NO	NO	NO	NO	36	165	86	31.5889	101	67	18.03	1.83	5.43	0.46	3.09	4.79	210.57	49.67	32	20	34	4.9	3.2	0.9	0.9	28	20	33	22	0.65	0.52	1.25	35	72	6.11	176.839	7.19	91.6927	64
51	10.1782	0	male	Han	NO	NO	NO	NO	YES	YES	NO	NO	NO	NO	36	165	86	31.589	101	67	18.03	1.83	2.9	0.46	1.57	4.79	210.57	49.67	32	20	34	4.9	3.2	0.9	0.9	28	20	33	22	0.65	0.52	1.25	35	72	6.11	176.839	6.19	90.4823	64
52	10.1762	1	female	Han	NO	NO	NO	YES	NO	YES	NO	YES	YES	NO	71	155	55	22.8938	134	77	7.73	4.26	3.64	0.87	3.31	7.2	199.1	72.8	35	19	31	4.4	3.2	1	1	28	17	30	25	0.57	0.94	0.61	27.27	46.73	2.99	170.438	13.67	115.153	53.29
53	10.1248	1	female	Han	NO	NO	YES	YES	NO	YES	NO	NO	NO	YES	80	150	56	24.8891	143	71	14.09	2.22	4.53	0.9	2.68	9	338.5	119	31	19	46	4.6	3	1	0.9	42	30	58	30	1.01		1.7	34.78	62.34	4.61	170.781	10.43	116.805	64.04
54	10.1245	1	female	Han	NO	NO	NO	YES	NO	YES	NO	YES	YES	NO	75	158	60	24.035	148	68	9.39	3.33	3.14	0.75	1.63	5.2	208.4	67.8	34	23	44	4.8	3.2	1	0.9	26	18	39	30	0.65	0.82	0.79	33.33	66.56	5.19	184.178	8.65	117.995	61.9
55	10.1107	0	male	Han	NO	NO	NO	NO	NO	NO	NO	NO	NO	NO	36	157	67	27.1825	191	110	5.29	5.83	3.93	0.97	1.26	8.1	354	94	27	18	37	4.6	3.1	1	0.9	26	17	35	23	0.56	0.77	0.73	32.61	59.42	4.58	170.781	8	102.731	61.04
56	10.1068	1	female	Han	NO	NO	NO	NO	YES	YES	NO	NO	NO	NO	83	156	51	20.957	120	86	10.24	3	4.68	0.91	2.25	4.99	236	50.97	41	22	32	5.3	3.5	0.9	0.9	30	20	31	23	0.4	0.64	0.63	33.96	84.47	6.76	203.795	5.71	141.899	62.41
57	10.0852	1	male	Uygur	NO	NO	NO	NO	YES	NO	NO	NO	NO	NO	76	180	85	26.2354	129	67	9.89	3.04	5.05	1.03	1.45	7.58	379.6	74.7	33	18	36	4.9	3.3	1.3	1.3	24	18	35	25	0.56	0.77	0.73	34.78	62.34	4.68	302.795	9.4	150.824	61.9
58	10.0799	0	male	Han	YES	YES	NO	NO	YES	NO	NO	NO	NO	NO	36	160	54	21.0942	178	84	7.33	4.08	3.97	1.02	1.47	4.2	206.7	80				4.2	2.8	0.9	0.9					0.85	0.62	1.37	33.33	49.03	3.82	133.988	8.4	88.4821	62.4
59	10.0781	0	female	Han	NO	NO	YES	YES	NO	NO	NO	YES	NO	NO	77	178	84	26.5119	155	75	8.78	3.4	2.32	0.53	1.79	6.42	189.95	75.07	36	18	40	4.9	3	1.1	1	32	19	34	23	0.64	0.51	1.25	38.78	77.81	5.06	220.765	6.74	109.937	68.97
60	10.0767	0	female	Uygur	NO	NO	NO	NO	YES	YES	YES	NO	NO	NO	50	169	69	24.1595	187	114	17.64	1.69	4.02	1.35	1.36	4	242	55	36	21	38	4.8	3.1	1.2	1.2	30	20	33	23	0.62	0.9	0.69	35.42	69.6	5.22	259.562	12.4	147.378	64.73
61	10.063	1	male	Han	YES	YES	YES	NO	NO	YES	NO	NO	NO	NO	59	170	75	25.9518	129	79	10.39	2.83	5.17	0.88	2.25	10.3	427.6	99.6	31	17	36	5.2	3.5	1.1	1	30	18	30	26	0.74	1.06	0.7	32.69	78.64	5.35	244.745	10.25	134.357	60.72
62	10.059	1	female	Uygur	NO	NO	YES	YES	NO	YES	NO	NO	YES	NO	71	160	58	22.6569	150	77	9.54	3.07	3.37	1.13	1.77	6.8	271.4	71.3	30	17	30	5	3.3	0.9	0.9	23	17	32	20	0.86	0.91	0.95	34	74.11	4.97	183.409	11.12	118.474	62.68
63	10.0493	0	male	Han	NO	YES	NO	NO	YES	NO	YES	NO	YES	NO	56	175	73	23.8376	120	83	11.07	2.62	4.84	0.79	1.88	4.3	439	87.3	27	23	30	4.8	3.2	1	1	26	16	32	24	0.49	0.65	0.75	33.33	66.56	6.19	198.394	2.03	107.298	61.9
64	10.0372	1	female	Uygur	NO	NO	NO	YES	NO	NO	YES	YES	YES	YES	64	160	60	23.438	127	68	10.42	2.75	3.04	1.01	3.59	9.08	176.42	54.76	31	23	34	4.6	3.2	0.9	0.9	29	20	30	23	0.77	0.3	2.57	30.43	56.38	4.28	157.8	6.43	100.312	57.92
65	10.02	1	female	Han	NO	NO	NO	NO	NO	YES	NO	YES	NO	NO	71	155	55	22.8934	152	87	6.49	4.34	2.71	0.69	5.27	2.9	269	46	28	21	35	4.7	3.1	0.9	0.9	25	18	31	28	0.71	1.09	0.65	34.04	64.44	4.58	164.034	10.47	110.826	62.95
66	10.0116	0	male	Han	NO	YES	NO	NO	NO	NO	NO	NO	NO	NO	37	165	68	24.9778	129	69	7.89	3.54	3.69	0.68	1.61	6.4	328.22	99.68	33	19	32	5	3.4	1	0.9	29	18	35	25	0.59	0.73	0.81	32	70.8	5.66	198.049	7.43	114.878	59.88
67	10.0113	0	male	Han	NO	NO	NO	NO	YES	YES	NO	NO	NO	NO	36	165	86	31.5888	101	67	17.13	1.63	4.43	0.46	3.88	4.79	210.57	49.67	32	20	34	4.9	3.2	0.9	0.9	28	20	33	22	0.65	0.52	1.25	35	72	6.11	176.839	6.19	91.6927	64
68	9.9849	0	male	Uygur	YES	YES	NO	NO	YES	NO	YES	NO	NO	NO	60	163	100	37.6384	173	91	9.61	2.83	4.4	0.92	1.52	4.4	331.6	69.4	34	21	33	4.8	3.2	0.9	0.9	31	20	32	23	0.69	1.11	0.62	33.33	66.56	4.99	170.38	7	81.467	61.9
69	9.9778	1	male	Uygur	YES	YES	YES	YES	YES	YES	NO	YES	YES	NO	59	170	100	34.6028	136	72	7.85	3.44	3.26	0.82	2.3	5.5	411.8	54.6	33	21	40	5	3.3	1.2	1.2	30	20	36	26	0.75	0.98	0.77	34	74.11	5.26	277.833	11	130.187	62.68
70	9.9718	1	male	Han	YES	YES	NO	NO	YES	YES	NO	NO	NO	NO	32	170	89	30.796	220	110	7.12	3.77	4.17	0.97	2.85	6.5	249.8	28.7	30	17	40	4.6	2.9	1.4	1.4	25	18	36	24	1.14	0.83	1.37	36.17	67.36	6.06	306.604	9.58	153.563	65.81
71	9.9653	0	female	Han	NO	NO	NO	NO	YES	NO	YES	NO	NO	NO	52	180	96	29.6298	114	90	4.09	6.52	6.18	0.87	2.19	3.5	521.3	95.5				5.1	3.4	0.9	0.9					0.74	0.52	1.42	33.33	76.37	5.58	190.092	2.03	87.443	61.68
72	9.9541	0	female	Uygur	NO	NO	NO	YES	NO	YES	NO	NO	YES	YES	64	170	73	25.2602	180	94	11.27	2.34	2.54	1.06	3	4.7	172	57	30	18	30	4.8	3.2	0.9	0.9	22	16	32	24	0.46	0.62	0.74	33.33	66.56	5.13	170.38	6.13	93.6927	61.9
73	9.9535	0	male	Uygur	YES	YES	YES	YES	NO	YES	NO	NO	YES	NO	66	178	75	23.6713	143	82	10.67	2.47	3.69	0.71	3.25	7.8	460	75				4.7	3.2	1.2	1.2					0.53	0.81	0.65	29.79	58.23	4.48	250.652	5.93	132.417	56.89
74	9.9287	0	female	Uygur	NO	NO	YES	NO	NO	YES	NO	NO	YES	NO	77	178	84	26.5118	164	84	6.18	4.16	4.33	0.62	4.03	3.22	360.5	85.4	36	22	35	4.9	3.2	0.9	0.9	25	20	34	23	0.52	0.69	0.75	34.69	71.85	5.1	176.839	6.65	89.1818	63.69
75	9.9285	0	female	Other	NO	NO	NO	NO	NO	YES	NO	NO	NO	NO	62	178	110	34.7183	123	72	4.85	5.3	4.21	0.84	1.77	6.26	195.6	63.54	30	20	40	5.2	3.5	1	0.9	28	19	35	24	0.45	0.68	0.66	32.69	78.64	5.66	212.395	4.74	90.7322	60.72
76	9.9256	0	male	Uygur	YES	NO	NO	NO	NO	NO	NO	NO	YES	NO	60	183	83	24.7851	166	100	10.09	2.54	3.87	0.56	3.19	2.32	309.1	77.06	33	20	36	5.1	3.4	0.9	0.9	27	20	32	23	0.95	0.59	1.7	33.33	76.37	5.73	190.092	7.6	95.0034	61.68
77	9.9171	1	male	Uygur	NO	NO	NO	YES	NO	YES	YES	NO	YES	YES	59	167	74	26.5345	130	66	4.3	5.91	2.95	0.66	0.75	5.15	279.38	134.71	48	31	42	6.4	4.4	1.1	1.1	31	20	36	29	0.43	0.69	0.62	30.77	123.55	8.4	375.268	7.14	209.554	57.2
78	9.9006	0	male	Han	NO	NO	NO	NO	NO	NO	NO	NO	NO	NO	36	157	67	27.1826	191	110	4.69	5.33	4.57	0.97	1.71	8.1	354	94	27	18	37	4.6	3.1	1	0.9	26	17	35	23	0.56	0.77	0.73	32.61	59.42	4.58	170.781	9	103.989	61.04
79	9.8912	1	male	Han	NO	NO	YES	YES	NO	YES	NO	YES	YES	NO	69	170	85	29.4122	120	73	8.75	2.83	3.05	0.92	2.61	6.91	392.36	85.97	39	22	40	5.6	3.8	1.2	1.2	31	20	36	23	0.52	0.81	0.64	33.96	84.47	4.39	336.239	7.74	172.732	72.87
80	9.8768	1	female	Han	NO	NO	YES	YES	NO	YES	YES	NO	NO	NO	69	170	70	24.2222	188	82	6.34	3.85	4.06	1.17	4.03	11.1	418.8	112.1	35	23	41	5.7	4.1	0.9	0.9	27	21	30	22	0.74	0.52	1.42	28.07	85.82	6.09	232.549	8.05	132.198	53.62
81	9.8761	1	female	Han	NO	NO	NO	NO	YES	NO	YES	NO	NO	NO	63	163	70	26.3473	170	74	6.47	3.77	4.46	1	3.59	3.9	241.2	84.7	33	20	39	4.9	3.2	0.9	0.9	32	23	32	23	0.52	0.84	0.62	34.69	71.85	5.03	176.839	7.12	103.029	63.69
82	9.8732	1	male	Kazak	YES	YES	NO	NO	YES	NO	NO	YES	NO	NO	63	175	105	34.2867	198	94	6.02	4.04	2.65	0.75	3.24	3.3	380	70	38	22	36	5.7	3.8	1.2	1.1	30	20	36	26	0.83	1.04	0.8	33.33	98.09	8.44	326.279	10.76	146.504	61.29
83	9.8708	1	female	Uygur	NO	NO	NO	NO	YES	YES	NO	NO	NO	NO	65	155	89	37.0455	137	66	7.2	3.37	4.66	1.42	1.88	6.23	427.75	89.87	35	19	41	5.1	3.5	0.9	0.9	31	21	36	34	0.62	0.79	0.78	31.37	72.94	5.76	190.092	6.9	99.7808	58.91
84	9.8676	1	male	Han	NO	NO	NO	YES	YES	NO	YES	YES	YES	NO	85	163	60	22.5837	108	88	6.95	3.48	3.46	0.76	2.66	4.51	351.91	127.79	35	20	42	5	3.2	1.1	1.1	29	18	36	23	0.77		0.94	35.29	79.68	6.14	244.578	15.44	153.687	64.36
85	9.8674	0	male	Han	YES	NO	NO	YES	NO	NO	NO	NO	YES	NO	64	167	78	27.9683	156	91	3.34	7.24	5.1	0.7	1.03	1.8	402	99.7	33	22	46	4.6	3	1.3	1.3	29	20	35	25	0.87	0.53	1.64	34.78	62.034	4.55	273.348	8.29	148.494	64.04
86	9.8644	1	female	Han	NO	NO	NO	YES	NO	YES	NO	NO	YES	NO	78	160	60	23.4376	180	60	7.24	3.33	3.42	0.93	1.74	6.31	297.29	75.64	28	18	38	4.8	3.2	1	1	30	20	36	23	0.98	0.43	2.28	33.33	66.56	4.53	198.394	9.91	126.116	61.9
87	9.8573	1	male	Han	NO	NO	NO	NO	NO	YES	NO	YES	YES	NO	53	175	85	27.7558	137	88	8.06	2.97	3.83	0.37	3.77	12.3	423.3	100.98	34	23	35	5.4	3.9	1.2	1.2	30	19	33	22	1.06	0.89	1.19	29.41	69.38	5.97	316.172	10.9	159.917	60.43
88	9.8572	1	female	Han	NO	NO	YES	NO	NO	YES	YES	NO	NO	NO	81	159	82	32.4362	170	78	8.61	2.78	2.7	1.67	2.82	3.9	276	37	30	18	32	4.5	3	1.1	1	27	18	31	22	0.78	1.21	0.64	33.33	57.45	3.73	190.626	10.7	103.489	62.14
89	9.8537	0	male	Han	NO	NO	NO	NO	YES	YES	YES	NO	NO	NO	55	180	85	26.2349	129	67	9.39	2.54	4.96	1.03	2.77	7.58	379.6	74.7	33	18	36	4.6	3	1	1	24	18	35	25	0.56	0.77	0.73	34.78	62.34	4.68	184.166	7.19	90.584	64.04
90	9.8485	1	female	Han	NO	NO	NO	YES	NO	YES	YES	YES	YES	NO	57	152	65	28.1341	168	101	8.92	2.66	4.13	1.1	3.78	3.05	283.27	42.74	30	20	35	4.8	3.2	0.9	0.9	31	20	36	22	0.45	0.65	0.69	33.33	66.56	4.93	170.38	7.43	107.373	61.9
91	9.8406	0	male	Han	YES	YES	NO	NO	YES	NO	YES	YES	NO	NO	51	168	66	23.3851	165	100	6.65	3.54	5.17	0.82	1.62	6.08	317.35	67.54	32	26	31	5.2	3.5	1	1	28	19	32	19	0.39	0.65	0.6	32.69	78.64	5.5	228.346	12.67	133.014	60.72
92	9.8398	1	female	Han	NO	NO	NO	YES	NO	NO	NO	YES	NO	YES	78	150	50	22.2232	139	75	7.15	3.29	2.81	0.89	1.7	5.12	294.72	75.98	28	19	48	5.7	3.6	0.8	0.8	26	18	37	21	1.62	0.66	2.45	36.84	105.61	8.029999999999999	198.377	15.37	143.016	65.99
93	9.8283	1	male	Uygur	YES	NO	YES	YES	NO	YES	NO	NO	YES	NO	66	172	70	23.6622	154	86	10.57	2.2	2.44	1.04	1.23	6.1	305	71	40	25	39	5	3.3	1.1	1.1	30	18	36	20	0.94	0.68	1.38	33.33	76.37	4.66	244.578	9.95	138.078	61.68
94	9.8138	1	male	Kazak	NO	NO	YES	YES	NO	NO	YES	YES	YES	NO	47	170	90	31.1421	131	74	7.23	3.17	3.17	0.88	1.69	4.2	278	59	35	16	38	5.9	4.1	1	0.9	31	17	35	24	0.75	0.85	0.88	30.51	98.99	7.52	266.34	6.89	132.567	57
95	9.8048	0	female	Uygur	NO	NO	NO	NO	YES	YES	YES	NO	NO	NO	50	169	69	24.1591	187	114	16.34	1.39	4.01	1.35	3.35	4	242	55	36	21	38	5	3.3	1.4	1.4	30	20	33	23	0.62	0.9	0.69	35.42	69.6	5.22	349.934	12.4	201.054	64.73
96	9.8018	0	male	Han	YES	YES	NO	NO	NO	YES	YES	YES	YES	NO	51	165	65	23.8757	206	88	10.34	2.19	2.83	0.95	3.88	6.8	332.76	68.52				5.1	3.3	1	1					0.63	0.7	0.9	35.29	79.68	4.94	220.67	9.39	130.915	64.36
97	9.798	1	female	Han	NO	NO	YES	YES	NO	NO	NO	NO	YES	NO	77	158	66	26.4388	150	80	6.92	3.26	2.94	1.09	2.33	10.97	381.79	131.8	27	18	38	5	3.3	1.1	1.1	26	18	35	24	1.09	1.22	0.89	34	74.11	5.34	244.578	11.38	149.507	62.68
98	9.796	1	female	Han	NO	NO	NO	YES	NO	NO	NO	NO	NO	NO	78	162	63	24.0062	150	87	10.67	2.11	3.88	1.42	3.85	6.17	306.66	55.04	39	23	30	4.9	3.2	0.9	0.9	26	17	34	20	0.84	0.99	0.85	34.69	71.85	5.6	176.839	11	108.971	63.69
99	9.7868	1	male	Han	NO	NO	NO	NO	NO	YES	NO	NO	YES	NO	49	175	78	25.4697	112	89	4.29	5.2	2.84	0.8	2.34	3.71	324.51	69.06	29	22	41	4.8	2.9	1.2	1	27	20	30	22	0.68	0.74	0.92	39.58	75.31	4.9	228.104	10.07	120.716	70.04
100	9.7865	0	male	Uygur	YES	YES	YES	YES	YES	YES	YES	YES	YES	NO	59	173	94	31.4082	134	76	6.82	3.27	5.13	0.57	1.3	3.73	309.2	67.34	33	20	45	5.2	3.5	1.2	1.2	32	20	35	24	0.77	0.68	1.13	32.69	78.64	6.06	296.703	5.7	140.911	60.72
101	9.7816	0	female	Uygur	NO	NO	NO	YES	NO	YES	NO	YES	YES	YES	64	170	73	25.2596	180	94	10.37	2.14	5.92	1.06	3.52	4.7	172	57	30	18	30	4.8	3.2	0.9	0.9	22	16	32	24	0.46	0.62	0.74	33.33	66.56	5.13	170.38	6.13	94.8348	61.9
102	9.7773	1	female	Han	NO	NO	NO	NO	NO	NO	NO	NO	NO	NO	72	150	60	26.667	161	78	6.26	3.53	2.84	0.73	4.31	5.9	269	52	30	20	30	4.4	2.9	0.9	0.9	25	18	33	19	0.7	1.3	0.54	34.09	55.48	5.49	145.67	9.24	96.3361	63.27
103	9.7614	1	male	Uygur	YES	YES	YES	YES	YES	YES	NO	NO	YES	NO	65	170	95	32.8721	178	91	7.74	2.81	4.02	0.62	0.77	4.8	262	72	47	24	40	4.7	3.1	1.6	1.2	30	20	36	31	0.52	0.77	0.68	34.04	64.44	4.25	317.174	7.93	153.106	62.95
104	9.7578	1	female	Han	NO	NO	NO	YES	NO	YES	YES	YES	NO	NO	72	167	85	30.4786	101	60	8.24	2.63	5.05	0.76	1.47	5	503	78	35	26	55	5.8	3.9	1	0.9	31	21	53	31	0.92		1.05	32.76	100.65	7.35	258.278	10.39	133.941	60.43
105	9.7508	1	male	Han	YES	YES	YES	YES	NO	YES	NO	YES	YES	NO	60	172	77	26.0276	155	77	9.08	2.37	3.82	1.02	3.33	4.19	340.46	94.21	40	22	35	5	3.4	1.2	1.2	32	21	39	23	0.76	0.69	1.1	34.04	64.44	4	277.833	11.29	149.469	64.41
106	9.7478	0	male	Han	YES	YES	NO	NO	YES	NO	NO	NO	NO	NO	36	160	54	21.094	178	84	5.83	3.68	3.1	1.02	3.05	4.2	206.7	80	37	16	30	4.2	2.8	0.9	0.9	24	18	32	22	0.85	0.62	1.37	33.33	49.03	3.82	133.988	8.48	89.4389	62.4
107	9.7466	1	male	Uygur	YES	NO	NO	NO	NO	NO	YES	NO	NO	NO	53	170	86	29.7584	174	88	5.61	3.82	3.42	0.86	2.42	6.8	316	96	37	20	39	5.3	3.6	1.2	1.2	28	20	34	23	0.74	0.68	1.09	32.08	80.91	6.23	306.362	8.65	156.379	59.78
108	9.7465	1	female	Uygur	NO	NO	YES	YES	NO	YES	YES	YES	YES	NO	69	160	75	29.2978	118	59	7.68	2.79	3.24	1.05	1.85	6.4	290	61	28	19	41	5.5	3.9	0.8	0.9	27	18	36	26	0.54	0.67	0.81	29.09	81.51	6.28	201.548	8.71	114.477	55.29
109	9.7465	0	male	Han	NO	NO	NO	NO	YES	NO	NO	NO	NO	NO	38	175	101	32.9798	151	86	4.26	5.03	4.04	0.94	3.32	5.4	324	69	36	22	39	5	3.3	1.2	1.2	30	20	38	24	0.83	0.66	1.26	34	74.11	5.78	277.833	8.46	125.864	62.68
110	9.7453	1	male	Han	NO	NO	NO	NO	NO	NO	NO	NO	NO	NO	45	172	80	27.0418	179	96	7.38	2.9	2.26	0.85	2.81	5.1	401	78	31	20	44	5.7	3.8	1.4	1.2	30	20	36	24	0.96	0.82	1.17	32.76	100.65	8.56	388.458	11.94	204.85	60.43
111	9.7451	0	male	Han	YES	NO	NO	YES	NO	YES	NO	NO	YES	NO	57	175	90	29.3884	149	90	4.83	4.43	3.75	0.71	2.02	4.8	436.8	93				4.9	3.2	1.2	1.2					0.61	0.8	0.76	34.69	71.85	5.1	268.623	6.95	129.983	63.69
112	9.7403	1	male	Uygur	NO	NO	NO	YES	NO	YES	NO	YES	YES	NO	59	175	98	32.0007	126	75	6.3	3.38	2.94	0.66	1.11	4.2	310	63	39	20	36	5.2	3.4	1.2	1.2	20	15	37	24	0.76	0.61	1.25	34.62	82.07	5.5	296.703	7.33	138.672	63.37
113	9.708	0	female	Han	NO	NO	NO	NO	NO	NO	YES	NO	NO	NO	66	160	80	31.2501	121	75	9.68	2.13	3.09	1.17	3.79	4.57	378.39	68.35	33	20	35	4.9	3.2	1	0.9	30	20	35	24	0.65	0.88	0.74	34.69	71.85	5.53	191.054	7.65	103.435	63.69
114	9.7053	1	female	Han	NO	NO	NO	YES	NO	YES	YES	YES	NO	NO	75	155	51	21.2282	135	72	6.25	3.29	3.71	1.01	2.17	5.1	206	44	33	23	44	4.6	3	0.9	0.9	28	20	29	23	0.86	0.6	1.43	34.78	62.34	4.8	157.8	14.23	110.342	64.06
115	9.7044	0	male	Han	YES	YES	NO	NO	NO	NO	YES	YES	YES	NO	60	183	95	28.3679	167	107	4.28	4.8	4.96	0.97	1.49	6.8	457	79	34	22	35	5	3.2	1.2	1.2	29	21	38	24	0.69	0.54	1.28	36	77.28	5.64	277.833	7.26	127.481	65.36
116	9.7012	1	female	Han	NO	NO	NO	YES	NO	YES	YES	YES	YES	NO	79	152	60	25.9695	141	60	6.34	3.23	3.44	1.55	1.15	7.47	285.63	73.87	30	20	30	4.6	3	0.9	0.9	30	18	31	21	0.66	0.56	1.18	34.78	62.34	4.86	157.8	7.29	103.523	64.04
117	9.7007	0	female	Han	NO	NO	NO	YES	NO	NO	NO	NO	YES	NO	73	167	86	30.8371	132	87	4.44	4.61	3.75	0.87	1.83	4.1	395	92.3	37	22	38	5	3.3	0.9	0.9	28	19	33	29	0.53	0.45	1.18	34	74.11	5.26	183.409	5.05	93.2621	62.68
118	9.694	0	female	Kazak	NO	NO	NO	YES	NO	YES	YES	YES	NO	NO	67	179	86	26.8408	125	89	3.03	6.71	6.21	0.75	2.86	4.6	546	55	44	24	34	4.9	3.2	1.4	1.2	30	20	35	26	0.78	0.55	1.42	34.69	71.85	4.74	302.795	8.21	148.444	63.69
119	9.6928	1	male	Han	YES	YES	NO	YES	YES	NO	YES	YES	YES	NO	71	170	75	25.9518	152	86	5.99	3.39	4.61	0.46	1.42	12.26	214.33	395.99	34	20	40	5.5	3.9	1.1	1.1	29	20	32	21	0.56	0.6	0.93	28.57	83.66	7.36	288.164	7.93	158.193	54.44
120	9.6875	1	male	Han	NO	NO	NO	YES	NO	YES	NO	NO	YES	NO	65	165	63	23.1409	171	62	7.86	2.57	6.35	1.4	1.71	4.77	346.78	69.85	37	20	30	4.8	3.1	1	1	26	17	32	23	0.72	1.04	0.698	35.42	69.6	3.76	198.394	10.29	120.891	64.73
121	9.687	1	female	Han	NO	NO	NO	YES	YES	YES	YES	NO	YES	NO	75	157	70	28.3988	112	56	6.43	3.14	4.28	1.51	2.63	6.6	357	80.5	36	19	42	5.3	3.5	1	0.9	30	19	38	40	0.57	0.63	0.9	33.96	84.47	6.17	219.746	9.14	130.817	62.41
122	9.6772	1	male	Uygur	YES	YES	YES	YES	YES	NO	YES	NO	YES	NO	70	170	85	29.4123	150	75	9.43	2.12	4.12	0.62	1.29	6.2	167.8	64.8	37	21	48	5.8	4	1	1	30	20	47	24	2.4	1.03	2.33	31.03	96.56	7.44	277.018	15.37	142.308	57.97
123	9.6758	1	male	Han	NO	YES	YES	NO	NO	NO	NO	NO	NO	NO	52	178	84	26.5122	149	94	7.34	2.72	3.13	0.96	2.64	10.11	353.54	114.13	44	24	69	6.6	4.5	0.9	0.9	30	20	45	38	0.89		2.28	31.34	134.02	9.109999999999999	303.816	9.5	153.218	57.39
124	9.6706	1	female	Kazak	NO	NO	NO	NO	NO	YES	NO	YES	NO	NO	69	156	81	33.2842	129	80	8.31	2.39	4.33	0.78	1.12	4.73	269.04	62.35	26	19	57	4.2	2.8	1.2	1.2	24	20	42	31	0.97	1.05	0.92	33.33	49.03	3.78	208.344	12.9	115.031	62.4
125	9.6704	0	male	Han	NO	NO	NO	YES	NO	YES	NO	NO	NO	NO	76	170	92	31.834	171	80	5.47	3.63	5.01	0.77	3.17	4.8	332.6	94.4	31	21	33	4.5	3	1.2	1.2	27	18	32	22	0.54	0.7	0.77	33.33	57.45	4.08	233.279	6.75	113.149	62.14
126	9.6681	0	female	Uygur	NO	NO	YES	YES	NO	YES	NO	NO	YES	NO	72	160	72	28.1258	153	73	6.35	3.12	5.31	0.88	2.79	4.5	372	53	30	20	39	4.8	3.2	1	1	30	20	32	22	0.67	0.55	1.22	33.33	66.58	4.53	198.394	6.09	113.712	61.9
127	9.66	1	female	Uygur	NO	NO	YES	NO	NO	YES	NO	YES	YES	NO	77	167	75	26.8933	168	95	6.8	2.89	5.87	1.26	2.32	3.7	279	58	28	20	35	5	3.5	1.1	1	30	20	36	23	0.58		1.1	30	67.27	5.39	228.627	7.43	126.783	56.98
128	9.6583	1	male	Han	YES	YES	NO	NO	YES	YES	NO	YES	YES	YES	60	172	82	27.7182	154	75	6.39	3.07	2.57	1.03	3.22	6	339.8	70.1	35	17	48	4.6	3	2.5	1.5	28	17	36	26	0.62	0.75	0.83	34.04	64.44	4.32	546.669	8.75	284.531	62.95
129	9.6511	1	female	Other	NO	NO	NO	NO	NO	NO	NO	NO	NO	NO	71	158	64	25.637	132	68	7.52	2.59	2.86	1.28	2.82	6	274.2	60.6	32	9	39	4.8	3.1	0.9	0.9	24	19	33	22	0.06	0.82	0.07	35.42	69.6	5.43	170.38	7.43	105.767	64.73
130	9.6436	0	male	Kazak	YES	NO	NO	NO	NO	YES	YES	NO	YES	NO	70	174	92	30.3872	144	83	6.06	3.19	3.22	0.85	2.12	3.4	441	80.9	36	23	35	5	3.2	1	0.9	28	20	35	22	0.78	0.92	0.85	36	77.28	6.03	198.049	9.18	94.9376	65.36
131	9.6415	1	female	Kazak	NO	NO	NO	NO	NO	YES	NO	NO	NO	NO	69	160	89	34.7659	176	72	6.89	2.8	3.89	0.76	1.69	6.63	375.27	53.82	29	19	38	5.3	3.5	0.9	0.9	33	24	36	31	0.97	0.53	1.83	33.96	84.47	5.83	203.795	8	105.288	62.41
132	9.6382	1	male	Han	NO	NO	YES	YES	NO	YES	YES	NO	YES	NO	70	168	82	29.0534	125	65	7.6	2.53	4.08	0.63	1.47	7.65	308.03	123.84	34	22	36	5.3	3.8	1.2	1.2	28	20	33	21	0.55	0.79	0.7	30	67.37	5.73	306.362	7.59	161.507	69.65
133	9.6379	0	male	Han	YES	YES	NO	NO	NO	NO	YES	NO	NO	NO	60	170	85	29.4122	120	73	8.25	2.33	3.04	0.92	3.88	6.91	392.36	85.97	39	22	40	5.3	3.5	0.9	0.9	31	20	36	23	0.52	0.81	0.64	33.96	84.47	4.39	203.795	12.93	103.339	62.41
134	9.6352	1	male	Han	NO	NO	NO	NO	NO	YES	NO	NO	YES	NO	72	175	85	27.756	168	81	7.1	2.7	4.62	0.93	3.29	5.4	309	97.1	36	21	40	5.4	3.6	1.2	1.2	31	25	36	22	0.78	0.52	1.5	35.29	79.68	5.66	316.172	6.65	159.917	59.88
135	9.6311	1	female	Other	NO	NO	NO	NO	NO	NO	NO	NO	NO	NO	69	170	70	24.2221	157	74	6.45	2.96	5.55	1.03	4.45	3.9	162	41	47	35	42	5.2	3.7	0.9	0.9	31	21	33	23	0.38	0.82	0.46	28.85	71.38	5.71	196.888	8.29	111.925	55.12
136	9.6286	1	male	Han	NO	NO	NO	NO	YES	YES	YES	NO	NO	NO	67	160	58	22.6568	180	97	5.52	3.45	3	1.43	4.35	4.2	293.2	62.8	32	21	41	4.5	3	1.1	1	30	20	37	26	0.52	0.77	0.68	33.33	57.45	3.73	190.626	7.93	123.135	62.14
137	9.6262	0	male	Han	YES	NO	NO	NO	NO	NO	YES	NO	NO	NO	54	165	78	28.6507	138	76	5.81	3.27	4.74	0.77	3.19	5.9	438.8	99.3	33	21	42	4.7	3.1	1.2	1.2	30	20	35	25	0.64	1.03	0.62	34.04	64.44	4.64	250.652	8.53	135.341	62.95
138	9.6252	1	female	Han	NO	NO	NO	NO	NO	NO	NO	NO	YES	NO	82	150	57	25.3343	140	88	6.73	2.82	3.17	1.12	2.14	10.3	399.21	96.74	30	20	33	4.2	2.8	1	0.9	23	17	33	25	0.59	0.77	0.77	33.33	49.03	3.92	145.409	7.84	98.6089	62.4
139	9.6134	1	male	Han	NO	NO	YES	YES	NO	NO	NO	NO	YES	YES	55	182	103	31.0961	101	76	5.39	3.48	4.89	0.65	1.49	1.43	331.48	78.29	43	27	49	6.2	4.2	1	1	34	23	36	32	0.95	0.86	1.1	32.26	115.41	7.96	311.962	9.26	138.971	59.49
140	9.6089	0	male	Han	YES	NO	NO	NO	YES	NO	NO	NO	YES	NO	53	175	85	27.7557	137	88	7.56	2.47	4.18	0.37	1.83	12.3	423.3	100.98	34	23	35	5.1	3.6	0.9	0.9	30	19	33	22	1.06	0.89	1.19	29.41	69.38	5.97	190.092	8.13	94.9228	56.04
141	9.6074	0	male	Han	YES	YES	NO	NO	YES	YES	NO	YES	YES	NO	60	170	92	31.8343	124	84	7.9	2.36	4.38	1.36	3.42	4.6	392.8	76.9	36	23	40	5.3	3.5	1	1	31	20	38	26	0.71	0.92	0.77	33.96	84.47	6.08	236.146	10.14	114.539	62.41
142	9.6052	1	male	Uygur	YES	YES	YES	YES	NO	YES	NO	NO	YES	NO	65	169	74	25.9104	180	100	6.14	3.03	4.27	0.71	1.77	8.4	360	104	34	21	37	5.6	4	1.1	0.8	30	19	35	26	0.66	0.81	0.81	28.57	83.66	6.36	242.509	9.8	134.503	54.44
143	9.6049	1	female	Han	NO	NO	NO	YES	NO	YES	NO	NO	YES	YES	77	158	74	29.6427	114	75	7.56	2.46	3.84	1.02	1.24	4.5	375	53	33	22	45	5.5	4	0.9	0.9	26	19	43	29	0.89	1.1	0.812	27.27	77.42	6.66	217.948	12.87	125.553	52.525
144	9.6	1	female	Han	NO	NO	NO	NO	NO	YES	NO	YES	YES	NO	82	148	63	28.7623	128	70	6.73	2.75	3.63	1.23	1.94	11.2	386	256	34	22	49	5.1	3.5	0.9	0.9	29	20	45	26	0.56	0.86	0.65	31.37	72.94	0.58	190.092	5.15	123.645	58.91
145	9.5959	0	female	Han	NO	NO	YES	YES	NO	NO	NO	NO	NO	NO	77	178	84	26.5124	155	75	7.68	2.4	3.91	0.53	1.45	6.42	189.95	75.07	36	18	40	4.9	3	1.1	1	32	19	34	23	0.64	0.51	1.25	38.78	77.81	5.06	220.765	6.74	111.334	68.97
146	9.5878	1	female	Kazak	NO	NO	NO	NO	NO	YES	NO	NO	NO	NO	79	160	74	28.9069	158	96	6.37	2.87	4.1	1.14	2.16	8.2	422	89	32	21	41	5.1	3.4	1	0.9	28	19	39	32	0.89	1.01	0.88	33.33	76.37	4.73	205.163	10.37	117.363	61.68
147	9.5869	0	female	Han	NO	NO	NO	NO	NO	YES	NO	YES	NO	NO	53	181	92	28.0829	127	84	3.69	4.95	4.16	0.79	2.36	6.3	464.5	77.5	32	22	40	5.5	3.7	1.2	1.2	29	20	39	25	0.49	0.76	0.64	33.96	84.47	6.67	326.131	6.13	155.212	62.41
148	9.5869	1	female	Uygur	NO	NO	NO	YES	NO	YES	NO	NO	NO	NO	57	160	97	37.8907	132	79	6.15	2.97	4.38	0.7	2.74	11.8	384	111	32	21	44	5.5	3.8	1.5	1.1	28	18	36	30	0.74	0.89	0.83	30.36	87.75	5.7	366.069	11.42	179.833	57.11
149	9.5853	1	male	Kazak	YES	NO	NO	NO	NO	YES	YES	NO	NO	NO	70	172	108	36.5072	101	65	6.49	2.81	4.96	0.92	1.57	9.86	634.58	106.02	31	20	47	5.3	3.8	1.2	1.2	26	17	37	24	0.95		0.9	28.3	73.39	6.46	306.362	12.44	136.385	54.23
150	9.5789	1	male	Han	YES	YES	NO	YES	YES	NO	YES	YES	YES	NO	44	172	90	30.4226	121	81	6.27	2.89	3.89	0.73	1.02	6.4	277	104	34	18	40	5.4	3.6	1	1	29	21	32	23	0.86	0.56	1.54	33.33	86.88	6.52	244.07	7.37	120.749	61.48
151	9.576	0	male	Han	NO	YES	NO	NO	NO	NO	NO	NO	NO	NO	35	175	103	33.6333	112	63	5.7	3.17	5.27	0.82	3.85	6.2	466	91	34	20	34	4.9	3.2	0.9	0.9	28	18	35	25	0.56	0.78	0.72	34.69	71.85	5.32	176.839	8	79.1933	63.69
152	9.569	1	male	Han	YES	NO	YES	YES	NO	YES	NO	YES	YES	NO	90	167	75	26.893	149	81	6.34	2.83	3.28	0.97	1.8	12.44	436.77	94.79	39	19	40	5.2	3.6	1	0.9	31	20	35	22	0.5	0.85	0.59	30.77	75.08	5.86	212.395	7.59	117.781	57.97
153	9.5673	1	female	Han	NO	NO	NO	NO	YES	NO	NO	NO	NO	NO	66	157	56	22.7193	147	68	6.49	2.76	5.6	1	2.69	3.3	179.2	63.1	27	16	34	4.5	3	0.9	0.9	27	16	33	22	0.84	0.94	0.89	33.33	57.45	4.37	151.679	9.29	100.797	62.14
154	9.5668	1	male	Han	NO	NO	NO	YES	NO	YES	YES	NO	YES	NO	78	173	96	32.0767	153	85	13.36	1.34	4.79	1.2	3.42	6.92	303.73	81.11	33	21	42	5.3	3.6	1.4	1.3	29	20	38	24	0.62	0.81	0.77	34	74.11	4.97	364.048	9.86	173.158	64
155	9.5513	1	male	Uygur	NO	YES	NO	YES	NO	NO	YES	YES	NO	NO	57	171	90	30.779	144	104	6.41	2.75	3.8	1.16	3.78	3.9	295.9	71.5	35	20	39	4.6	3	1.2	1.2	31	19	36	23	0.65	0.8	0.81	34.78	62.34	4.3	241.891	10.29	120.033	64.04
156	9.5493	1	male	Uygur	YES	NO	YES	NO	NO	YES	YES	YES	YES	NO	60	160	74	28.9067	157	81	8.54	2.06	2.71	0.66	1.41	6.9	229.1	83.1	42	23	45	5.8	4	0.9	0.9	35	23	43	34	0.52	0.69	0.75	30.51	98.99	76.52	240.019	8.43	137.303	57.15
157	9.5425	0	male	Kazak	NO	NO	YES	YES	NO	YES	NO	YES	YES	NO	77	160	72	28.1255	142	94	6.52	2.68	3.42	1.04	3.01	3.71	408.93	53.85	33	21	34	5.3	3.5	0.9	0.9	27	20	32	22	0.56	0.72	0.78	33.96	84.47	7.69	203.795	8.38	116.808	62.41
158	9.5313	1	male	Kazak	YES	YES	NO	YES	NO	YES	NO	YES	YES	NO	66	176	95	30.6698	136	73	5.52	3.13	5.83	0.75	1.73	6	303	80	29	16	39	5.7	4.1	1	0.9	28	17	30	24	0.59	0.7	0.84	28.07	85.82	6.87	250.334	6.46	118.743	53.62
159	9.5301	1	male	Han	YES	NO	NO	YES	NO	YES	NO	NO	YES	NO	64	160	60	23.4384	153	80	7.88	2.19	3.34	0.59	3.45	4.92	96.93	41.32	28	17	32	5.1	3.5	1.2	1.2	26	18	33	24	0.93	0.7	1.33	33.33	66.56	5.32	287.193	11.94	182.565	64.73
160	9.5279	1	male	Han	NO	NO	NO	YES	NO	NO	YES	NO	NO	YES	65	167	70	25.0999	125	77	7	2.46	3.39	1.09	2.5	5.7	305.3	62.9	37	26	56	5.3	3.6	1.2	1	31	21	45	24	1.15		1.11	32.08	80.91	6.15	270.318	15.38	155.284	59.78
161	9.5265	0	male	Han	YES	YES	YES	YES	NO	YES	YES	NO	YES	NO	61	155	55	22.8929	134	77	6.23	2.76	3.63	0.87	2.6	7.2	199.1	72.8	35	19	31	4.4	3.2	1	1	28	17	30	25	0.57	0.94	0.61	27.27	46.73	2.99	170.438	12.67	113.884	53.29
162	9.5157	0	female	Han	NO	NO	NO	NO	NO	NO	NO	NO	NO	NO	66	160	80	31.2507	121	75	8.38	2.03	4.61	1.17	2.82	4.57	378.39	68.35	33	20	35	4.9	3.2	1	0.9	30	20	35	24	0.65	0.88	0.74	34.69	71.85	5.53	191.054	7.65	104.796	63.69
163	9.5146	0	male	Han	NO	YES	NO	NO	NO	NO	NO	NO	NO	NO	37	165	68	24.9775	129	69	6.69	2.54	4.21	0.68	3.01	6.4	328.22	99.68	33	19	32	5	3.4	1	0.9	29	18	35	25	0.59	0.73	0.81	32	70.8	5.66	198.049	4	116.253	59.88
164	9.5086	0	female	Han	NO	NO	NO	YES	NO	NO	NO	NO	YES	NO	68	172	80	27.0423	184	80	9.23	1.83	3.9	1	2.32	7.9	252	51	33	20	44	5.7	3.9	0.9	0.9	30	20	38	27	0.46	0.65	0.71	31.58	94.13	7.06	232.549	5.11	121.1	58.82
165	9.5062	1	male	Han	NO	NO	YES	YES	NO	YES	NO	YES	YES	NO	67	180	86	26.5441	147	78	8.18	2.06	3.34	0.89	2.53	5.46	295.01	66.95	32	23	35	5.4	3.9	1.2	1.2	26	16	33	26	0.56	0.7	0.8	29.41	69.38	5.27	316.172	8.65	156.513	61.9
166	9.5046	1	male	Han	YES	NO	YES	YES	NO	YES	NO	NO	YES	NO	67	178	85	26.8282	159	74	8.54	1.97	6.05	0.86	4	4.9	364	92	37	23	41	4.8	3.3	1.2	1.2	32	21	38	24	0.75	0.98	0.77	33.33	57.45	4.08	259.562	11	130.08	74.31
167	9.502	1	female	Han	NO	NO	NO	NO	NO	NO	NO	NO	NO	NO	40	163	73	27.4763	133	84	6.58	2.55	4.96	1.01	1.91	4.3	262.4	52.7	33	19	34	4.9	3	0.9	0.9	30	18	32	24	0.94	0.8	1.18	38.78	77.81	7	176.839	9.29	100.826	68.97
168	9.5017	1	male	Uygur	NO	NO	NO	YES	NO	YES	YES	YES	YES	YES	73	170	80	27.6818	153	78	6.96	2.41	4.13	0.58	2.06	5	236.5	64.7	43	25	40	5.7	3.9	0.9	0.9	29	20	35	26	0.63	1.19	0.53	31.58	94.13	6.78	232.549	10	123.427	58.82
169	9.4992	1	male	Other	YES	YES	NO	YES	NO	YES	NO	YES	YES	NO	65		98		125	66	5.81	2.88	4.31	0.9	1.78	6.2	450	90	36	17	35	4.8	3.3	0.9	0.9	31	18	34	23	0.49	0.85	0.58	31.25	63.39	4.25	170.38	6.16	158.922	58.96
170	9.4915	1	female	Han	NO	NO	NO	NO	NO	YES	NO	YES	YES	NO	67	160	66	25.7821	116	64	6.15	2.7	3.69	1.14	2.17	5	355	63.6	35	21	40	4.7	3.1	0.9	0.9	29	19	36	30	0.65	0.82	0.79	34.04	64.44	4.51	164.034	10.29	99.5292	62.95
171	9.4872	1	female	Han	NO	NO	NO	YES	NO	YES	YES	NO	NO	NO	64	156	50	20.5458	154	88	6.86	2.41	6.97	1.2	1.5	4.5	200	55	32	21	32	5.3	3.2	0.9	0.9	27	17	30	25	0.95	0.56	1.7	39.62	94.38	7.17	203.795	11	143.145	69.74
172	9.4837	0	male	Han	YES	NO	YES	YES	NO	YES	NO	NO	YES	NO	90	158	57	22.8333	138	69	6.67	2.47	7.34	0.85	3.03	7.5	250.7	68.7	28	18	32	4.8	3.2	0.8	0.8	26	17	30	21	0.52	0.68	0.76	33.33	66.56	4.66	144.014	7.43	93.4853	61.9
173	9.4814	1	male	Han	NO	YES	NO	NO	YES	YES	YES	YES	NO	NO	53	172	80	27.0421	149	104	6.25	2.63	4.48	1.18	2.59	5.2	380	107	37	26	42	5.4	3.6	1.2	1.2	31	21	33	24	1	0.27	3.7	32.73	89.29	6.61	316.172	7.13	166.731	60.57
174	9.4801	1	male	Han	NO	NO	NO	YES	NO	NO	YES	NO	NO	NO	67	165	67	24.6103	153	85	5.76	2.85	3.49	0.9	2.88	5.6	331	64	33	20	32	5	3.3	1	1	26	20	29	20	0.84	1.2	0.7	34	74.11	5.19	213.12	9.4	126.025	62.68
175	9.4789	1	male	Han	NO	NO	NO	YES	NO	YES	NO	NO	YES	NO	66	160	67	26.172	129	51	6.05	2.71	3.27	1.24	1.84	5.8	309	69	35	22	41	5.3	3.5	1.1	1	30	20	30	25	0.64	0.49	1.31	34	84	6.59	253.001	7.4	152.355	62
176	9.4771	1	male	Han	YES	YES	YES	YES	NO	NO	YES	NO	NO	NO	61	170	90	31.1421	129	60	6.13	2.67	3.54	0.66	1.14	6.9	480.8	102.4	40	31	54	5.1	3.5	1.6	1.2	32	22	33	26	0.85	0.21	4.05	30.77	75.08	4.73	361.204	9.1	179.784	57.97
177	9.4761	0	male	Han	YES	YES	NO	NO	YES	NO	NO	NO	NO	NO	40	167	71	25.4585	117	63	4.91	3.33	7.34	0.9	4.67	7.2	338	80	38	24	32	4.5	3	1.2	1.2	28	20	31	25	0.45	1.02	0.44	33.33	57.45	4.48	233.279	6.92	131.455	62.14
178	9.4725	0	male	Han	YES	YES	NO	NO	YES	YES	NO	YES	NO	NO	51	150	57	25.3338	149	71	7.87	2.07	3.6	1.1	1.61	4.9	335	44				4.5	3	0.9	0.9					0.85	0.62	1.37	33.33	57.45	4.48	151.679	6.33	101.682	62.14
179	9.4706	0	male	Han	NO	NO	YES	YES	NO	NO	YES	YES	YES	NO	57	165	70	25.7118	150	80	7.07	2.3	2.83	0.87	2.35	4.5	346	86	30	20	36	5.1	3.4	0.9	0.9	30	20	32	24	0.75	0.84	0.89	33.33	76.37	5.12	190.092	11.9	108.649	61.68
180	9.4663	0	male	Han	YES	YES	NO	NO	YES	NO	NO	NO	NO	NO	50	160	67	26.1722	115	60	3.93	4.12	3	1.3	3.83	3.72	262.6	54.75	29	18	39	4.5	3.1	0.9	0.9	28	19	37	26	0.63	0.91	0.69	31.11	54.53	4.36	151.679	8.4	90.2474	58.98
181	9.4662	0	male	Kazak	NO	NO	NO	YES	NO	YES	NO	YES	YES	NO	69	175	80	26.123	144	94	6.86	2.36	5.18	0.76	3.4	6.8	353	67	32	20	34	5.2	3.5	0.9	0.9	28	19	35	22	0.68	0.87	0.78	32.69	78.64	5.98	196.888	8	101.562	60.72
182	9.4654	1	female	Uygur	NO	NO	NO	NO	NO	YES	YES	NO	YES	YES	49	160	61	23.8283	232	140	6.27	2.58	4.56	1.23	4.02	4.2	334.6	71.6	26	18	33	4.7	3.1	1.2	1.1	25	16	31	23	0.76	0.7	1.09	33.33	66.56	4.99	235.144	7.08	148.3	61.9
183	9.4635	0	male	Han	YES	NO	NO	YES	NO	NO	YES	NO	YES	NO	53	175	75	24.4902	157	83	6.07	2.66	2.69	0.77	1.98	4.2	438	55	38	27	41	4.8	3.2	1.2	1.2	29	20	34	22	0.7	0.85	0.82	33.33	66.56	5.13	259.562	8.24	138.463	61.9
184	9.4617	0	male	Uygur	YES	YES	NO	NO	NO	YES	NO	NO	YES	NO	58	183	80	23.8893	164	101	14.39	1.12	4.15	0.6	2.02	3.83	169.75	45.54				5.4	3.8	0.9	0.9					0.85	0.65	1.31	29.63	79.36	5.16	210.815	7.19	106.076	56.16
185	9.459	1	female	Uygur	NO	NO	NO	YES	NO	YES	NO	NO	YES	NO	61	175	57	18.613	141	70	5.7	2.82	4.22	0.82	2.34	4.5	258.6	89.9	32	20	30	4.6	2.9	0.9	0.9	28	18	33	21	0.62	0.87	0.71	36.96	65.13	4.95	157.8	8.29	96.9826	66.91
186	9.4572	0	female	Kazak	NO	NO	NO	NO	NO	NO	YES	YES	NO	NO	69	172	77	26.0285	155	77	8.58	1.87	4.77	1.02	3.31	4.19	340.46	94.21	40	22	35	4.7	3.1	0.9	0.9	32	21	39	23	0.76	0.69	1.1	34.04	64.44	4	164.034	10	87.1641	62.95
187	9.4529	1	female	Uygur	NO	NO	NO	YES	NO	YES	NO	YES	YES	NO	52	157	85	34.4844	151	92	6.39	2.5	3.12	1.11	3.05	4.4	363.2	62.5	33	22	32	5	3.2	0.9	0.9	27	19	27	22	1.04	0.94	1.11	36	77.28	5.33	183.409	10.9	98.2216	65.36
188	9.4528	0	male	Han	YES	NO	NO	NO	NO	YES	YES	NO	NO	NO	50	174	98	32.3692	159	92	6.52	2.45	3.07	0.7	1.63	6.6	391	69	34	23	39	5.2	3.4	0.9	0.9	31	24	36	26	0.47	0.8	0.59	34.62	82.07	5.33	196.888	5.88	91.0295	63.37
189	9.4506	1	male	Han	YES	YES	NO	NO	NO	YES	YES	YES	YES	NO	53	169	95	33.2627	105	69	6.13	2.6	4.58	1.2	2.58	6.9	382	75	34	19	42	5.4	3.7	1.3	1.3	26	17	36	23	0.62	0.78	0.79	33.33	76.37	5.96	355.117	8.29	171.928	63.27
190	9.4456	1	male	Han	NO	NO	YES	NO	NO	YES	NO	NO	YES	NO	76	172	82	27.7183	155	70	6.72	2.36	2.55	1.13	1.95	6.7	318	67	32	20	40	4.4	2.8	1.2	1.2	28	21	36	23	0.52	0.69	0.75	36.36	58.14	4.13	224.818	7.3	117.013	66.3
191	9.4401	1	female	Han	NO	NO	YES	NO	NO	NO	NO	YES	YES	NO	73	158	60	24.0351	158	78	7.37	2.14	2.87	1.39	2.2	3.3	215.5	71	33	19	40	4.9	3.2	1.1	1.1	28	20	34	23	0.56	0.81	0.69	34	74.11	5.78	236.272	7.12	151.369	62.68
192	9.4396	1	male	Kazak	YES	YES	NO	YES	NO	NO	YES	YES	YES	NO	51	176	100	32.2833	145	92	6.11	2.58	3.33	0.87	2.68	4.3	335	74	34	24	38	5.3	3.4	1.2	1.2	28	20	38	24	0.48	0.81	0.59	35.19	90.44	6.33	306.362	6.65	141.135	64
193	9.4379	0	female	Han	NO	NO	YES	NO	YES	YES	NO	NO	NO	NO	53	170	85	29.4123	103	63	6.53	2.41	3.37	0.84	1.69	3.5	246.3	71.5	31	20	34	4.7	3.1	1.1	1	28	18	33	24	0.84	0.99	0.85	34.04	64.44	4.25	205.433	9.88	104.17	62.95
194	9.4358	1	male	Han	YES	YES	NO	YES	NO	YES	YES	YES	YES	NO	78	175	75	24.4907	156	91	6.41	2.45	3.93	0.98	2.1	9.4	309	88	39	20	47	5.7	4	1	1	32	19	36	23	0.56	0.61	0.92	29.82	90.04	6.39	268.594	7.22	145.021	56.26
195	9.4321	0	female	Kazak	NO	NO	NO	NO	NO	NO	NO	NO	NO	NO	72	160	90	35.1568	125	79	8.84	1.77	4.77	1.03	4.99	3.52	226.85	49.64	28	21	35	5	3.2	0.9	0.9	32	19	39	25	0.9	1.08	0.83	36	77.28	5.41	183.409	10.59	92.8608	65.36
196	9.4299	0	male	Han	NO	YES	NO	NO	NO	NO	YES	NO	NO	NO	55	174	95	31.3784	160	99	5.02	3.11	5.09	0.96	3.2	6.7	378	68				5.4	3.7	0.9	0.9					0.65	0.81	0.8	31.48	83.18	6.65	210.815	6.33	99.2306	58.86
197	9.4285	1	male	Kazak	NO	NO	NO	YES	YES	YES	NO	YES	YES	NO	71	180	133	41.0496	140	102	6.96	2.24	4.19	0.74	1.64	4.3	300.7	70.9	38	22	57	6	4.2	1.2	1.1	37	27	52	36	0.56	0.71	0.79	29.51	103.86	8.720000000000001	356.418	11.18	136.685	55.56
198	9.4271	0	female	Other	NO	NO	NO	NO	YES	NO	NO	NO	NO	NO	34	157	59	23.9364	144	78	5.6	2.78	2.66	0.89	2.02	2.6	298.9	58.1				4.6	3.1	0.9	0.9					0.51	0.31	1.65	32.61	59.42	4.52	157.8	2.03	101.154	61.04
199	9.4249	1	female	Han	NO	NO	NO	NO	NO	NO	NO	NO	NO	NO	81	150	50	22.2224	147	82	5.69	2.73	4.95	1.34	4.17	6.2	302.8	62.8	32	22	32	4.3	2.7	1	1	27	17	33	18	0.69	0.94	0.73	37.21	56.05	3.81	163.762	8.67	118.06	67.47
200	9.4163	1	female	Uygur	NO	NO	NO	NO	YES	YES	NO	YES	YES	NO	57	165	60	22.0388	149	82	5.79	2.66	4.54	0.98	1.32	4.5	213.3	56.4	31	19	35	4.8	3.2	1	0.9	31	21	31	23	0.79	0.97	0.81	33.33	66.56	5.79	184.178	10.88	114.853	61.9
201	9.409	1	female	Han	NO	NO	YES	YES	NO	NO	NO	YES	YES	NO	75	161	65	25.077	137	58	6.14	2.49	3.3	1.71	1.7	2.5	280.9	69.9	40	22	35	4.8	3	0.9	0.9	31	20	33	19	0.63	0.74	0.85	37.5	72.52	5.15	170.38	8.58	103.783	67.45
202	9.4081	1	female	Uygur	NO	NO	NO	YES	NO	YES	NO	YES	YES	YES	74	155	58	24.1416	172	79	6.11	2.5	2.91	0.88	2.03	12.1	321.6	200.6	30	18	30	4.7	3.1	1.1	1.1	27	19	35	23	0.65	0.74	0.88	33.33	66.56	5.26	220.073	5.74	145.014	61.9
203	9.4073	0	male	Uygur	YES	YES	YES	YES	NO	NO	YES	NO	YES	NO	66	180	120	37.0374	131	74	4.57	3.34	4.68	0.78	4.67	6	455.5	79.8	33	21	35	5	3.4	1.1	1.1	29	20	37	24	0.62	0.96	0.65	33.33	66.56	5.66	244.578	8.27	100.028	61.9
204	9.4049	1	female	Other	NO	NO	NO	YES	NO	YES	YES	NO	YES	NO	68	155	70	29.1365	151	68	6.14	2.48	5.61	0.77	2.77	5.7	254	62	31	20	40	5	3.3	1	0.9	30	19	36	25	0.86	0.65	1.32	34	74.11	5.63	198.049	7.62	118.763	62.68
205	9.3991	1	male	Han	YES	NO	NO	NO	YES	YES	NO	NO	YES	NO	53	160	62	24.2194	152	78	6.08	2.49	2.41	0.9	2.25	6	324	97.6	33	19	42	5.6	4	0.9	0.9	26	18	32	24	0.83	1.14	0.73	28.57	83.66	6.02	225.192	8.36	140.912	54.44
206	9.3961	0	male	Han	YES	YES	NO	YES	NO	NO	YES	NO	NO	NO	82	172	83	28.0562	174	105	5.59	2.7	4.13	0.82	2.28	5	361	84	37	22	43	5.9	4.1	1.4	1.4	30	20	33	25	0.81	1.07	0.76	31.58	94.13	6.97	457.649	7.36	236.658	58.82
207	9.3938	0	male	Uygur	YES	YES	NO	YES	YES	NO	YES	NO	NO	NO	45	163	75	28.2285	168	107	4.97	3.03	2.75	1	1.6	4.8	290	51	39	19	42	5.9	4	1.4	1.4	29	20	35	29	0.89	0.74	1.2	33.33	98.09	6.67	457.649	6.29	257.265	61.29
208	9.3918	1	female	Han	NO	NO	NO	YES	NO	YES	YES	NO	YES	NO	61	170	60	20.7619	88	48	6.45	2.33	3.39	1.5	1.38	5.4	192	72.5	30	18	30	5.1	3.4	0.8	0.8	25	16	33	18	0.85	0.52	1.63	33.33	76.37	5.58	161.236	9.1	98.6699	61.68
209	9.3914	0	female	Uygur	NO	NO	NO	NO	NO	YES	NO	NO	NO	NO	68	178	93	29.3533	131	82	9.16	1.64	4.09	0.8	1.46	4.4	318.4	79.2	47	29	40	5.7	4.1	0.9	0.9	32	22	37	24	0.6	0.73	0.82	28.07	85.82	6.01	232.549	8	109.523	53.62
210	9.3897	0	male	Other	YES	YES	NO	YES	NO	YES	NO	YES	YES	NO	65	168	92	32.5969	160	80	16.85	0.89	3.34	0.75	2.37	6.89	370.41	102.6				5.2	3.6	0.9	0.9					0.57	0.94	0.61	30.77	75.08	4.96	196.888	8.13	96.0662	57.97
211	9.3895	0	male	Han	YES	YES	NO	NO	YES	NO	NO	NO	NO	NO	50	160	67	26.1725	115	60	3.73	4.02	4.7	1.3	1.81	3.72	262.6	54.75	29	18	39	4.5	3.1	0.9	0.9	28	19	37	26	0.63	0.91	0.69	31.11	54.53	4.36	151.679	8.4	91.3398	58.98
212	9.3888	1	female	Han	NO	NO	NO	YES	NO	YES	NO	YES	NO	NO	69	160	59	23.0477	128	67	5.83	2.57	2.76	1.08	1.71	4.8	262	50	30	19	30	4.8	3.5	0.9	0.9	24	17	34	23	0.83	0.92	0.9	27.08	56.65	4.31	170.38	10.76	109.176	52.69
213	9.3858	1	male	Kazak	NO	NO	NO	YES	NO	YES	NO	NO	YES	NO	71	165	60	22.0391	145	75	4.85	3.08	3.34	1.01	2.28	4.47	393.06	73.69	36	22	35	4.7	3.1	1.1	1	27	16	30	22	0.68	0.72	0.94	34.04	64.44	5.93	205.433	10.07	128.108	62.95
214	9.3832	0	male	Han	NO	NO	NO	YES	NO	YES	NO	YES	YES	NO	68	175	71	23.1842	148	55	5.82	2.56	5.18	0.89	2.39	4.8	314	66	30	20	39	5.2	3.3	1	1	25	20	30	20	0.89	0.66	1.35	36.54	85.38	6.15	228.346	7.12	125.231	65.93
215	9.3789	0	male	Uygur	NO	NO	NO	YES	NO	YES	YES	NO	YES	NO	59	178	98	30.9313	167	96	4.71	3.15	4.09	0.93	2.34	6.1	464.9	83				5.4	3.6	1.2	1.2					0.5	0.78	0.64	33.33	86.88	6.08	316.172	11.9	144.549	61.48
216	9.3761	1	female	Han	NO	NO	NO	NO	NO	YES	NO	NO	YES	NO	74	160	63	24.6103	126	61	5.38	2.75	3.47	1.07	2.31	4.9	361	77	32	21	28	4.7	3.1	0.9	0.9	30	20	31	20	0.42	0.74	0.57	34.04	64.44	4.38	164.034	6.65	101.847	62.95
217	9.3703	0	male	Kazak	NO	NO	NO	NO	YES	YES	NO	NO	NO	NO	57	170	72	24.9137	163	92	5.02	2.93	2.22	0.73	1.26	4.4	407	73.9	31	21	34	4.9	3.3	0.9	0.9	29	17	34	24	0.92	0.67	1.37	32.65	68.68	5.22	176.839	7.67	97.9335	60.88
218	9.367	0	female	Han	NO	NO	NO	NO	YES	NO	YES	YES	YES	NO	71	170	108	37.3708	162	74	6.16	2.38	2.9	1.05	2.8	7.4	505.1	120.9				4.8	3.1	0.9	0.9					0.73	1.03	0.71	35.42	69.6	4.87	170.38	8.4	75.1732	64.73
219	9.3615	1	female	Han	NO	NO	NO	YES	NO	YES	NO	YES	NO	NO	66	157	53	21.5026	137	66	6	2.43	3.54	1.29	2.8	4.3	359.5	72.8	30	19	38	4.8	3.4	0.9	0.9	28	18	35	24	1.2	0.96	1.25	29.17	60.08	5.17	170.38	12.9	116.118	55.88
220	9.3574	0	male	Han	YES	YES	NO	YES	YES	NO	YES	YES	NO	YES	70	175	85	27.7552	168	81	6.6	2.2	2.29	0.93	2.76	5.4	309	97.1				5.1	3.3	0.9	0.9					0.78	0.52	1.5	35.29	79.68	5.66	190.092	7.43	94.9228	64.36
221	9.3565	1	male	Han	YES	NO	NO	NO	NO	NO	YES	NO	NO	NO	56	174	85	28.0754	164	94	6.2	2.34	2.4	0.7	1.61	5.1	451	80	33	17	40	4.9	3.2	1.3	1.2	28	19	35	25	0.67	0.89	0.75	34.69	71.85	5.17	285.478	10.57	144.839	63.69
222	9.354	1	male	Uygur	YES	NO	NO	YES	NO	YES	NO	YES	NO	NO	50	178	82	25.8814	174	99	5.98	2.42	3.1	0.53	2.44	5.6	400	72	42	26	57	5.7	3.6	2.9	1.8	27	18	42	30	0.44	0.62	0.71	36.21	108.43	8.67	963.658	12	492.19	65.1
223	9.3527	1	female	Kazak	NO	NO	NO	YES	NO	YES	NO	NO	NO	NO	75	160	80	31.2506	133	67	5.69	2.54	1.96	1.28	4.32	10.9	324	127	39	20	40	5	3.4	1.2	1.2	28	20	35	25	0.56	0.99	0.57	32	70.8	5.38	277.833	10.43	152.396	59.88
224	9.35	0	female	Han	NO	NO	NO	NO	NO	NO	YES	NO	YES	NO	82	168	82	29.054	125	65	7.1	2.03	2.25	0.63	1.88	7.65	308.03	123.84	34	22	36	5	3.5	0.9	0.9	28	20	33	21	0.55	0.79	0.7	30	67.37	5.73	183.409	7.19	95.4511	56.98
225	9.3406	1	male	Kazak	YES	NO	NO	YES	NO	NO	YES	YES	NO	NO	64	170	85	29.4126	154	84	6.58	2.17	3.02	0.94	1.78	5.2	315	67	31	19	42	6	4.2	1	1	28	18	38	23	0.59	0.87	0.68	30	101.42	8.32	294.24	8.38	151.156	56.34
226	9.3405	0	male	Han	NO	NO	NO	NO	YES	NO	NO	NO	NO	NO	15	174	90	29.7269	122	84	5.47	2.61	4.77	0.64	1.58	5.2	366	65	36	25	39	4.9	3.2	0.9	0.9	30	20	35	23	0.76	0.52	1.46	34.69	71.85	4.67	176.839	6.08	85.8231	63.69
227	9.3402	1	male	Han	YES	YES	NO	YES	NO	YES	NO	NO	YES	NO	82	170	82	28.3741	130	72	5.19	2.75	4.67	0.89	2.59	13.56	452.65	199.12	30	19	42	5.6	3.6	0.9	0.9	29	20	35	32	0.97	1.11	0.87	35.71	99.23	7.05	225.192	13.93	117.957	64.58
228	9.3398	1	female	Han	NO	NO	NO	YES	NO	NO	NO	NO	YES	NO	73	153	57	24.3505	108	107	5.73	2.49	4.4	0.97	1.92	6.4	310	75	27	16	38	4.5	3.1	0.9	0.9	25	17	36	25	0.81		0.9	31.11	54.53	3.65	151.679	9.29	101.6	58.98
229	9.3331	0	female	Uygur	NO	NO	NO	YES	NO	NO	YES	NO	YES	NO	61	155	55	22.8934	152	87	4.99	2.84	3.14	0.69	1.86	2.9	269	46	28	21	35	4.7	3.1	0.9	0.9	25	18	31	28	0.71	1.09	0.65	34.04	64.44	4.58	164.034	9.47	109.605	62.95
230	9.3294	0	male	Kazak	YES	YES	YES	YES	NO	YES	NO	NO	YES	NO	52	163	72	27.0996	122	76	4.77	2.96	1.9	0.96	2.59	4.8	416.4	79.8	32	20	35	5	3.3	0.9	0.9	28	17	31	23	0.76	0.49	1.55	34	74.11		183.409	7.43	104.032	62.68
231	9.3289	0	male	Han	YES	NO	NO	YES	NO	YES	NO	NO	YES	NO	84	178	80	25.2502	134	72	4.41	3.2	3.11	1.01	3.83	5.55	297.09	59.36	35	23	41	4.9	3.2	1	0.9	36	20	35	25	0.98	0.71	1.38	34.69	71.85	4.67	191.054	7.84	97.6311	63.69
232	9.3266	0	male	Other	NO	NO	NO	YES	NO	NO	YES	NO	YES	NO	55	182	75	22.6423	146	69	5.5	2.56	2.65	1.09	2	5.1	395	44	36	20	34	4.6	3	0.9	0.9	28	16	30	24	0.71	0.58	1.22	34.78	62.34	4.36	157.8	6.45	82.3034	64.04
233	9.3187	1	female	Han	NO	NO	NO	YES	NO	NO	YES	YES	NO	NO	79	153	47	20.0782	137	67	5.61	2.49	4.6	1.53	3.9	5.5	278.9	75.5	32	20	39	4.8	3.2	0.9	0.9	31	20	33	34	1.22	0.88	1.39	33.33	66.56	5.46	170.38	12.09	124.556	61.9
234	9.3185	0	male	Kazak	NO	NO	NO	YES	YES	NO	NO	NO	NO	NO	50	159	63	24.9208	118	67	6.88	2.03	4.63	0.98	3.33	5.9	415.8	68.7	29	22	29	5.1	3.4	0.9	0.9	25	18	35	24	0.62	0.84	0.74	33.33	76.37	5.35	190.092	6.2	117.095	61.68
235	9.3164	0	male	Han	NO	NO	NO	NO	YES	NO	NO	NO	NO	NO	42	160	85	33.2034	136	76	5.62	2.48	3.04	0.88	0.74	4.4	367	47	42	25	38	4.8	3.2	1	1	29	21	35	26	0.75	0.53	1.42	33.33	66.56	4.53	198.394	6	103.811	61.9
236	9.316	0	female	Han	NO	NO	NO	NO	NO	NO	NO	YES	YES	NO	65	161	64	24.6907	124	72	5.4	2.58	3.76	0.64	3.14	5.7	464	62	36	22	40	4.5	3	0.9	0.8	28	18	33	23	0.47	0.91	0.52	33.33	57.45	3.91	139.491	5.22	84.6221	62.14
237	9.3104	0	male	Han	YES	YES	NO	NO	YES	NO	NO	NO	NO	NO	39	166	64	23.226	115	94	7.57	1.83	3.34	0.91	2.68	4.1	336.7	74.7	31	22	35	4.9	3.2	0.9	0.9	29	19	35	24	0.85	0.6	1.42	34.69	71.85	5.32	176.839	5.68	105.33	63.69
238	9.308	0	male	Han	YES	NO	NO	NO	YES	YES	NO	NO	NO	NO	36	160	52	20.3131	186	84	12.34	1.12	3.52	0.99	2.13	7.55	228.77	80.44				4.5	3	0.8	0.8					0.54	0.96	0.56	33.33	57.45	4.54	127.69	8.4	85.773	62.14
239	9.3072	1	female	Uygur	NO	NO	NO	YES	NO	NO	YES	YES	YES	NO	54	155	78	32.4669	170	120	5.73	2.41	4.8	0.47	2.13	7.17	331.9	71.63	33	22	53	4.9	3.4	1.1	1.1	31	21	45	32	1.29		2.59	30	67.37	4.99	236.272	10.92	133.668	56.98
240	9.307	1	female	Kazak	NO	NO	NO	NO	NO	YES	NO	NO	NO	NO	64	160	55	21.4853	177	86	5.21	2.65	5.16	1.65	2.44	4.8	224	58	31	21	33	4.5	3	1	1	30	20	35	22	0.67	0.97	0.69	33.33	57.45	3.16	177.24	11.31	117.331	62.14
241	9.3046	1	male	Kazak	NO	NO	YES	NO	NO	YES	NO	NO	NO	NO	63	182	81	24.4536	147	87	4.85	2.84	4.31	0.77	2.94	6.94	267.76	109.06	36	18	40	5.3	3.7	1.3	1.3	26	17	35	22	0.76	0.89	0.85	32	70.8	4.89	344.328	10.41	174.804	58.82
242	9.3039	0	female	Uygur	NO	NO	NO	YES	NO	YES	NO	YES	YES	NO	56	176	93	30.0239	131	80	4.65	2.96	4.08	0.79	1.49	3.5	427.9	66.8	27	19	36	5.3	3.4	1	1	29	19	35	22	0.97	0.73	1.33	35.85	87.9	6.68	236.146	7.76	111.859	64.95
243	9.3036	0	female	Han	NO	NO	NO	NO	NO	NO	NO	NO	NO	NO	81	173	89	29.7375	114	57	4.26	3.23	3.76	0.64	1.53	3.9	237.2	53.8	33	25	42	5.7	4.1	0.9	0.9	29	18	32	26	0.62	0.49	1.27	28.07	85.82	7.29	232.549	7.47	115.415	53.62
244	9.2984	1	female	Han	NO	NO	NO	YES	YES	YES	NO	YES	NO	NO	66	160	63	24.6098	124	93	5.85	2.34	4.79	1.1	3.3	8.6	220.4	94.4	41	23	42	4.8	3.2	0.9	0.9	28	20	37	31	0.74		0.87	33.33	66.56	4.93	170.38	7.73	105.787	61.9
245	9.2979	0	female	Han	NO	NO	NO	NO	YES	NO	NO	NO	NO	NO	53	150	70	31.1118	152	90	5.03	2.72	5.09	1.13	3.85	9.1	478	68	30	19	33	4.6	3	0.9	0.8	26	18	35	25	0.65	0.89	0.73	34.78	62.34	4.24	145.219	7.65	87.5818	64.04
246	9.2834	0	female	Han	NO	NO	YES	NO	NO	NO	NO	NO	NO	NO	90	167	62	22.2318	151	93	4.48	3.01	4.09	1.45	2.34	5.1	226.7	51.7	40	17	35	4.3	2.9	0.9	0.8	28	20	30	22	0.95	0.68	1.4	32.56	50.86	3.56	128.353	7.92	77.3489	61.23
247	9.2812	1	female	Han	NO	NO	YES	YES	NO	YES	NO	NO	NO	NO	57	150	50	22.2224	108	55	5.98	2.25	3.28	1.3	3.07	3.2	199.2	61.3	27	15	38	4.5	3.1	0.9	0.9	24	15	31	20	0.9	3	0.3	31.1	54.53	3.71	151.679	12.09	109.35	60
248	9.2806	1	female	Other	NO	NO	NO	NO	NO	NO	NO	NO	NO	NO	78	150	45	20.0007	125	70	5.95	2.26	4.59	1.21	2.87	10	260	69	37	21	41	5.1	3.2	1	1	28	18	32	23	0.73	0.93	0.78	36.54	85.38	6.4	220.67	11.42	166.594	65.93
249	9.2776	0	male	Han	NO	YES	NO	NO	NO	NO	YES	NO	NO	NO	30	175	60	19.5923	120	80	4.41	3.04	3.36	0.74	2.93	5.6	488	75				4.9	3.1	0.9	0.9					0.8	0.6	1.33	36.73	74.89	5.54	176.839	7.65	105.098	66.39
250	9.2711	0	male	Han	YES	YES	NO	NO	NO	NO	NO	NO	NO	NO	28	155	49	20.396	113	60	7.4	1.8	2.57	0.49	3.23	6.83	161.68	34.06	31	20	43	4.4	2.8	0.8	0.8	24	16	32	21	1.56	1.18	1.32	36.36	58.14	3.66	122.449	10	86.2436	66.3
251	9.2689	0	male	Han	YES	YES	YES	NO	YES	YES	YES	NO	NO	NO	57	170	95	32.8722	120	85	5.96	2.23	3.89	0.73	1.85	7.85	374.21	82.7	38	25	42	5	3.3	1	0.9	27	20	35	24	0.47	0.73	0.64	34	74.11	5.93	198.049	4.95	94.3047	62.68
252	9.2672	0	male	Han	NO	YES	NO	NO	NO	YES	YES	NO	NO	YES	36	168	78	27.6364	154	114	5.35	2.48	3.6	0.98	2.28	3.3	411.4	82.6	40	20	37	5	3.4	1	1	31	19	36	24	0.6	0.77	0.78	32	70.8	5.95	213.12	8	113.95	59.88
253	9.2654	1	male	Han	NO	NO	NO	NO	NO	NO	YES	YES	NO	NO	82	176	60	19.3699	132	73	5.86	2.26	3.96	1.01	2.56	7.1	309.15	80.11	37	27	40	5.4	3.6	1	0.9	34	22	35	24	0.36	0.79	0.48	33.33	86.88	6.78	227.215	6.43	136	61.48
254	9.2621	0	female	Han	NO	NO	NO	NO	YES	NO	NO	NO	NO	NO	50	155	59	24.5578	165	75	5.57	2.37	3.35	0.83	3.58	5.3	273	67	32	21	41	4.2	3	1	1	28	19	33	24	0.87	1.2	0.73	30	40.45	3.52	157.21	11.6	102.745	57.79
255	9.2616	0	male	Uygur	YES	YES	NO	YES	NO	NO	NO	NO	YES	NO	50	150	58	25.7781	146	79	6.63	1.99	2.12	1.12	1.29	5	187.1	24.6	34	22	35	5.2	3.5	0.9	0.9	29	20	35	25	0.65	0.86	0.76	32.69	78.64	5.5	196.888	7.65	130.866	60.72
256	9.2604	1	male	Han	NO	NO	NO	NO	NO	YES	YES	NO	NO	NO	84	165	58	21.3042	130	54	5.78	2.28	2.63	1.02	2.4	4.4	400.2	86	35	20	46	4.5	3.2	1.4	4.3	28	18	33	23	0.58	0.79	0.73	29.26	53.21	3.72	995.286	7.19	630.487	54.66
257	9.2576	0	male	Uygur	YES	YES	NO	YES	NO	YES	NO	YES	NO	NO	41	162	71	27.0539	135	66	10.43	1.26	4.96	1	3.94	7	182	50	28	20	33	4.9	3.3	0.9	0.8	24	16	30	22	0.8	0.94	0.85	32.65	68.68	4.81	163.041	6.96	93.4814	60.88
258	9.2553	0	male	Han	NO	NO	NO	YES	NO	YES	NO	YES	YES	NO	61	168	78	27.6363	149	98	6.07	2.16	1.96	1.13	1.6	5.5	323	57	40	21	41	4.9	3.3	1.3	1.1	31	20	37	26	0.42	0.78	0.54	32.65	68.68	5.63	268.623	7	143.625	60.88
259	9.2542	1	female	Kazak	NO	NO	NO	YES	NO	YES	NO	NO	NO	NO	72	160	91	35.5474	148	78	6.12	2.14	3.91	0.98	1.78	8.1	380	109	33	20	35	4.8	3.2	1	1	26	16	33	25	0.64	1.2	0.53	33.33	66.56	4.66	198.394	9.53	101.19	61.9
260	9.2538	1	male	Han	NO	NO	YES	YES	NO	NO	YES	NO	YES	NO	73	175	70	22.8576	138	60	5.3	2.47	3.33	0.91	2.93	6.2	317.3	66.28	54	26	49	5.5	4	1.1	1.1	32	18	33	26	0.95		2.09	26.79	79.44	8.02	288.164	10.5	161.022	51.7
261	9.2527	0	female	Uygur	NO	NO	NO	NO	YES	NO	NO	NO	NO	NO	55	157	72	29.2106	146	80	4.79	2.73	2.03	0.66	1.92	6.98	319.09	62.31	30	20	30	4.2	2.9	0.8	0.8	26	19	33	23	0.54	0.88	0.61	30.95	46.37	3.29	112.265	7.2	65.0284	59.01
262	9.2475	1	male	Han	YES	NO	NO	NO	NO	NO	NO	NO	NO	NO	57	173	70	23.3888	144	98	5.86	2.22	4.52	1	3.53	4.9	368	63	33	18	35	5.2	3.2	1	0.9	31	17	31	24	0.67	0.94	0.71	38.46	88.55	7.7	212.395	9	119.498	68.37
263	9.2453	0	male	Han	YES	YES	NO	YES	YES	NO	NO	NO	NO	NO	58	166	73	26.4919	142	89	4.27	3.04	3.44	1.06	3.85	3.7	459.1	82	33	20	32	5	3.3	1	1	30	20	34	23	0.71	0.63	1.13	34	74.11	5.19	213.12	5.26	118.789	62.68
264	9.2442	1	male	Kazak	YES	NO	NO	YES	NO	YES	YES	YES	YES	NO	44	182	83	25.0577	109	71	4.93	2.63	2.52	0.75	3.13	5.4	270	65	35	22	32	5.3	3.4	1	1	27	21	37	26	1.03		1.19	35.85	87.9	5.19	236.146	6.72	118.381	64.95
265	9.24	0	female	Other	NO	NO	YES	NO	NO	YES	YES	NO	NO	NO	58	160	51	19.9225	134	76	5.79	2.23	3.75	1.42	2.82	6	270	60	27	18	28	4.6	3	0.8	0.8	26	18	33	20	0.9	0.82	1.1	34.78	62.34	4.36	133.032	8.18	90.136	64.04
266	9.2367	0	female	Han	YES	YES	NO	NO	YES	YES	YES	NO	NO	NO	46	160	66	25.7818	116	64	5.85	2.2	2.76	1.14	2.46	5	355	63.6	35	21	40	4.7	3.1	0.9	0.9	29	19	36	30	0.65	0.82	0.79	34.04	64.44	4.51	164.034	9.29	98.3477	62.95
267	9.2297	0	female	Uygur	NO	NO	NO	NO	NO	YES	YES	NO	YES	YES	49	162	64	24.3866	137	69	4.5	2.84	2.89	1.23	2.99	5.1	274	53	32	19	30	4.7	3.1	0.9	0.9	30	16	33	24	0.67	0.33	2.03	34.04	64.44	4.45	164.034	5.92	99.1442	62.95
268	9.2291	0	male	Han	NO	NO	NO	YES	NO	YES	YES	NO	NO	NO	73	170	80	27.682	137	78	4.45	2.87	3.84	0.87	2.27	4	346.2	80.1	32	21	39	4.8	3.2	1	1	30	20	36	22	0.76	0.65	1.17	33.33	66.56	5.32	198.394	10.13	103.974	61.9
269	9.2202	0	female	Han	NO	NO	NO	YES	NO	YES	YES	YES	YES	NO	61	183	77	22.9931	117	66	4.62	2.74	1.28	1.01	1.33	6.7	373.9	82.4	40	22	42	5.2	3.4	1	1	30	20	37	23	0.53	0.9	0.59	34.62	82.07	5.74	228.346	6.63	117.16	63.37
270	9.2167	1	male	Kazak	YES	NO	NO	NO	NO	YES	NO	NO	YES	NO	54	165	87	31.9565	152	89	5.84	2.16	4.38	0.82	2.6	4.7	378.4	74.1	35	20	38	5.2	3.5	1	1	31	21	38	25	0.89	0.67	1.33	32.69	78.64	7	228.346	8.74	117.637	60.72
271	9.2162	1	female	Han	NO	NO	NO	NO	NO	NO	NO	NO	YES	NO	57	160	40	15.6251	164	97	5.81	2.17	2.88	1.83	3.14	5.1	258	40	26	16	25	4.8	3.2	0.8	0.8	25	15	27	19	0.63	0.92	0.68	33.33	66.56	5.19	144.014	9.4	108.846	61.9
272	9.2122	1	male	Other	NO	NO	NO	NO	YES	YES	NO	NO	NO	NO	64	165	76	27.9162	123	79	7.8	1.61	4.86	1.1	2.6	300	3083	12969	34	17	30	5.3	3.3	1.2	1.1	24	17	33	23	1.03	1.25	0.82	40	83.24	6.24	288.103	12.44	159.738	60.57
273	9.211	1	male	Han	YES	YES	NO	YES	NO	YES	NO	YES	YES	NO	85	172	71	24.0004	167	84	5.65	2.22	4.63	0.88	1.55	6.1	328.5	103.6	35	23	38	5.4	3.6	1.2	1.2	30	20	32	25	1.25	1.04	1.2	35.29	79.68	6.37	316.172	12.9	177.246	67.45
274	9.2053	0	male	Han	NO	NO	NO	NO	YES	NO	YES	NO	NO	NO	38	160	60	23.4376	153	80	7.38	1.69	4.87	0.59	2.67	4.92	96.93	41.32	28	17	32	4.8	3.2	0.9	0.9	26	18	33	24	0.93	0.7	1.33	33.33	66.56	5.32	170.38	10.94	107.083	61.9
275	9.2047	1	male	Han	YES	NO	YES	YES	NO	YES	NO	NO	NO	NO	44	174	79	26.0937	153	107	6.11	2.04	4.04	1.09	2.91	8.2	428.6	110.1	39	22	42	5.7	3.8	0.9	0.9	28	20	36	26	0.53	0.81	0.65	33.33	98.09	6.38	232.549	7.59	122.653	61.29
276	9.2005	0	female	Uygur	NO	NO	YES	YES	NO	YES	NO	NO	YES	NO	72	160	72	28.125	153	73	5.35	2.32	3.76	0.88	4.15	4.5	372	53	30	20	39	5	3.4	1.2	1.2	30	20	32	22	0.67	0.55	1.22	33.33	66.58	4.53	277.833	6.09	161.24	61.9
277	9.1961	0	male	Other	YES	YES	NO	NO	NO	NO	NO	NO	NO	NO	41	150	55	24.4447	125	65	6.79	1.82	3.32	1.12	2.17	4.1	252.9	55.7	31	17	40	4.4	3	0.8	0.8	29	18	32	32	0.56	0.68	0.82	31.82	52.69	3.9	122.449	7.47	83.52	60.09
278	9.19	0	male	Uygur	YES	YES	NO	YES	YES	YES	NO	NO	YES	NO	59	176	88	28.4099	159	89	3.56	3.45	5.09	0.84	3.23	5.1	330	79	37	22	33	5.3	3.5	1	1	32	20	36	20	0.95	0.75	1.27	33.96	84.47	6.67	236.146	7.04	115.356	62.41
279	9.1841	1	female	Uygur	NO	NO	NO	NO	NO	NO	NO	NO	NO	NO	46	162	80	30.4836	201	107	5.5	2.22	4.5	0.79	2.96	5.3	270	43	34	19	33	4.9	3.2	1.2	1.2	27	18	34	23	0.85	0.62	1.37	34.69	71.85	5.6	268.623	8.08	146.364	63.69
280	9.1831	1	female	Kazak	NO	NO	NO	YES	NO	YES	NO	NO	YES	NO	68	165	73	26.8142	124	74	5.95	2.05	3.92	1.11	2.09	6.3	347	60	36	18	36	5	3.3	0.9	0.9	24	18	30	21	1.19	1.24	0.96	34	74.11	5.26	183.409	14.22	103.85	62.68
281	9.1775	0	female	Han	NO	NO	NO	YES	NO	YES	YES	NO	YES	NO	72	178	68	21.4627	129	85	3.99	3.04	4.17	0.8	2.75	3.9	292	72				5.2	3.5	0.9	0.9					0.59	0.87	0.68	32.69	78.64	5.82	196.888	7.43	109.182	60.72
282	9.1738	1	female	Han	NO	NO	NO	NO	NO	NO	NO	NO	NO	NO	71	155	63	26.2227	181	90	5.81	2.08	3.44	1.37	4.64	3.9	247	41	33	21	40	4.6	3	1	0.9	24	17	32	26	0.61	0.85	0.72	34.78	62.34	3.87	170.781	9.13	108.082	64.04
283	9.1695	0	female	Other	NO	NO	NO	NO	NO	NO	NO	NO	NO	NO	69	160	76	29.6884	124	69	5.52	2.18	7.34	0.59	2.22	7.1	326.8	56.6	26	20	38	4.8	3.3	0.9	0.9	27	16	32	23	0.83	1	0.83	31.25	63.39	5.07	170.38	7.22	94.8717	58.96
284	9.168	0	male	Han	YES	YES	YES	YES	NO	NO	YES	YES	YES	NO	61	155	55	22.8934	134	77	6.13	1.96	2.55	0.87	3.31	7.2	199.1	72.8	35	19	31	4.4	3.2	1	1	28	17	30	25	0.57	0.94	0.61	27.27	46.73	2.99	170.438	12.67	115.153	53.29
285	9.1652	0	male	Uygur	NO	NO	NO	NO	NO	NO	NO	YES	YES	NO	66	180	86	26.5437	147	78	7.68	1.56	4.24	0.89	2.02	5.46	295.01	66.95	32	23	35	5.1	3.6	0.9	0.9	26	16	33	26	0.56	0.7	0.8	29.41	69.38	5.27	190.092	2.03	92.9138	56.04
286	9.164	0	male	Han	YES	NO	NO	NO	NO	YES	NO	NO	NO	NO	56	178	85	26.8282	159	87	4.73	2.53	3.85	0.84	3.73	5.7	306.6	88.5	36	19	39	4.9	3.2	1	1	29	18	35	26	0.58	0.82	0.71	34.69	71.85	6.39	205.694	6.11	101.784	63.69
287	9.161	0	female	Han	NO	NO	NO	NO	YES	YES	NO	NO	NO	NO	53	160	69	26.9538	147	74	7.06	1.69	4.5	1.07	1.92	3.2	305.9	67.9	34	21	33	4.8	3.2	0.9	0.9	28	19	31	18	0.84	0.7	1.2	33.33	66.56	4.33	170.38	2.03	99.8536	61.9
288	9.1609	1	female	Uygur	NO	NO	YES	NO	NO	NO	YES	YES	YES	NO	76	150	46	20.445	149	71	5.35	2.23	3.71	0.92	1.73	3.9	335.4	58	33	22	31	4.9	3.2	0.9	0.9	28	18	31	22	0.94	0.62	1.52	34.69	71.85	5.17	176.839	7.29	132.255	63.69
289	9.1549	1	male	Kazak	NO	NO	NO	YES	NO	NO	NO	YES	YES	YES	54	170	58	20.07	129	92	5.62	2.11	3.43	0.71	1.4	4.3	295	74	36	20	42	4.8	3.4	1	1	27	20	35	30	2.37		4.05	29.17	60.08	4.51	198.394	12.9	123.295	55.88
290	9.1544	0	female	Han	NO	NO	NO	NO	NO	NO	NO	NO	NO	NO	45	180	102	31.4823	145	89	9.96	1.19	3.68	0.7	1.84	5.9	159.6	74.8	37	19	36	5.2	3.3	0.9	0.8	31	17	35	23	0.89	0.51	1.75	36.54	85.38	6.66	181.817	7.12	80.7824	65.93
291	9.1519	0	male	Han	NO	NO	NO	YES	YES	NO	YES	NO	YES	NO	49	169	95	33.2624	105	69	5.63	2.1	2.64	1.2	3.94	6.9	382	75	34	19	42	5.1	3.4	1	1	26	17	36	23	0.62	0.78	0.79	33.33	76.37	5.96	220.67	7.29	105.382	61.68
292	9.1515	0	female	Han	NO	NO	NO	NO	NO	NO	NO	NO	NO	NO	62	178	85	26.8279	159	74	8.04	1.47	2.49	0.86	3.01	4.9	364	92	37	23	41	4.5	3	0.9	0.9	32	21	38	24	0.75	0.98	0.77	33.33	57.45	4.08	151.679	10	75.0551	62.14
293	9.1514	0	male	Han	YES	YES	NO	NO	NO	NO	YES	NO	NO	NO	60	170	85	29.4126	120	73	7.25	1.63	3.04	0.92	1.57	6.91	392.36	85.97	39	22	40	5.3	3.5	0.9	0.9	31	20	36	23	0.52	0.81	0.64	33.96	84.47	4.39	203.795	6.74	104.693	62.41
294	9.1499	0	male	Han	YES	NO	NO	NO	YES	NO	YES	NO	NO	NO	46	155	72	29.9692	173	82	6.31	1.87	2.93	1.31	1.29	3.3	264.7	78.2	35	25	33	4.5	3	1	1	30	18	30	24	0.76	1.07	0.71	33.33	57.45	4.14	177.24	16.89	103.395	62.14
295	9.1494	1	male	Han	YES	YES	NO	YES	YES	NO	NO	YES	NO	YES	70	175	60	19.5921	123	66	5.46	2.16	5.09	0.92	1.59	12.2	452	123	34	21	35	5.3	3.8	0.9	0.9	30	18	36	25	0.71		0.89	28.3	73.39	5.5	203.795	13.67	122.429	54.23
296	9.1473	0	female	Han	NO	NO	NO	NO	YES	YES	NO	NO	NO	NO	53	174	73	24.1124	156	101	3.91	3.01	2.52	1.09	1.81	6.8	451	109	36	21	33	4.9	3.1	0.9	0.9	32	20	30	23	0.85	0.57	1.49	36.73	74.89	5.84	176.839	7.39	95.9567	66.39
297	9.147	0	male	Uygur	YES	NO	NO	NO	NO	NO	NO	NO	YES	NO	69	170	70	24.2219	132	65	8.78	1.34	6.76	0.93	1.97	6.69	409.82	79.44	34	22	36	5	3.4	0.8	0.8	30	20	36	24	0.75	0.95	0.79	32	70.8	4.32	155.396	10	87.2961	59.88
298	9.1364	0	male	Kazak	YES	NO	NO	YES	YES	NO	YES	NO	YES	NO	75	182	110	33.2086	156	109	5.85	1.99	4.86	0.96	2.2	3.8	406.6	85.4	34	24	36	5.3	3.6	1.3	1.3	27	20	37	25	0.65	0.95	0.68	32.08	80.91	5.74	344.328	10.94	145.575	59.78
299	9.1339	1	male	Other	NO	NO	NO	NO	YES	YES	NO	YES	NO	YES	68	175	60	19.5927	136	80	5.61	2.07	3.47	0.48	1.31	6	443.9	93.8	44	24	42	6	4.4	0.8	0.8	28	21	44	29	0.96		1.16	26.23	94.48	6.8	218.295	10.88	131.14	50.54
300	9.1314	0	male	Other	NO	YES	NO	NO	NO	NO	YES	NO	NO	NO	63	172	88	29.7467	156	92	4.29	2.7	1.81	0.71	1.51	3.8	439	75	35	21	35	4.9	3.2	1	1	29	19	31	20	0.45	0.79	0.57	34.69	71.85	5.39	205.694	6.93	101.693	63.69
301	9.1234	0	male	Uygur	YES	NO	YES	NO	NO	YES	YES	YES	YES	NO	60	180	102	31.4821	113	63	4.56	2.52	5.92	0.53	2.47	3.48	287.97	49.52				5.7	3.9	1	0.9					0.82	0.61	1.34	31.58	94.13	6.68	250.334	5.92	111.225	58.82
302	9.1219	0	female	Han	NO	NO	NO	NO	NO	NO	YES	NO	YES	NO	74	165	73	26.8144	140	95	6.27	1.83	4.56	1.05	1.24	3.59	371.94	47.48	36	21	37	4.7	3.1	0.9	0.8	28	19	36	26	0.77	0.6	1.28	34.04	64.44	4.25	151.054	6.16	84.482	62.95
303	9.1151	0	male	Kazak	NO	NO	YES	YES	NO	NO	YES	YES	YES	NO	47	175	76	24.8172	135	86	3.7	3.08	3.41	0.73	1.92	4.3	427.7	77.7	34	18	33	4.5	3	1	1	26	18	34	24	0.85	0.74	1.15	33.33	57.45	4.48	177.24	2.03	93.907	62.14
304	9.1148	0	female	Han	NO	NO	NO	NO	YES	NO	NO	NO	NO	NO	54	174	73	24.112	129	71	6.06	1.88	4.43	0.78	3.67	3.9	388.2	86.2	32	19	30	5	3.4	1	1	23	15	29	23	0.63	0.51	1.24	33.33	66.56	4.86	213.12	5.75	117.035	61.9
305	9.1147	0	male	Han	NO	NO	NO	YES	YES	NO	YES	NO	NO	NO	49	169	95	33.2623	105	69	5.53	2.06	3.11	1.2	2.3	6.9	382	75	34	19	42	5.1	3.4	1	1	26	17	36	23	0.62	0.78	0.79	33.33	76.37	5.96	220.67	7.29	106.836	61.68
306	9.1142	0	female	Uygur	NO	NO	NO	NO	YES	NO	YES	NO	NO	NO	56	163	74.5	28.0403	189	103	7.54	1.51	5.21	1.08	1.37	3.2	296.4	77.1	34	26	37	5.3	3.5	0.9	0.9	24	19	32	26	0.66	0.9	0.73	33.96	84.47	6.93	203.795	8.8	113.535	62.41
307	9.1092	0	female	Han	NO	NO	YES	NO	NO	YES	NO	YES	NO	NO	74	161	64	24.6909	135	78	4.76	2.38	2.37	0.98	1.91	5.9	291	42	29	19	30	4.6	3	0.8	0.8	26	19	30	24	0.89	0.72	1.24	34.78	62.34	4.36	133.032	7.19	80.7035	64.04
308	9.1088	0	female	Other	NO	NO	NO	YES	NO	YES	NO	NO	YES	NO	68	169	70	24.5091	138	96	5.96	1.9	3.21	0.91	1.81	5.2	338	55	31	19	30	5	3.3	0.9	0.9	25	15	31	19	0.76	0.93	0.82	34	74.11	5.78	183.409	6.61	103.387	62.68
309	9.105	0	male	Han	NO	NO	NO	NO	NO	YES	NO	NO	NO	NO	53	163	70	26.3471	170	74	4.97	2.27	2.5	1	2.83	3.9	241.2	84.7	33	20	39	4.9	3.2	0.9	0.9	32	23	32	23	0.52	0.84	0.62	34.69	71.85	5.03	176.839	6.12	101.783	63.69
310	9.1048	1	male	Han	NO	NO	NO	YES	NO	NO	NO	YES	YES	NO	59	166	76	27.5805	129	65	6.52	1.73	3.78	0.92	3.22	3.8	376.9	72.3	34	20	51	5.4	3.8	1.2	1.2	27	16	36	26	0.9	0.85	1.06	31.37	72.94	6.47	316.172	11.38	174.709	61.68
311	9.1043	0	male	Han	YES	NO	NO	NO	YES	YES	YES	NO	NO	NO	58	175	82	26.7762	138	83	5.42	2.08	2.46	0.9	2.07	6.5	330	82				4.8	3.2	0.9	0.9					0.62	0.89	0.7	33.33	66.56	4.99	170.38	7.19	86.7428	61.9
312	9.102	0	male	Han	YES	NO	NO	NO	NO	NO	NO	NO	NO	NO	57	175	89	29.0622	137	82	4.12	2.73	2.73	1.23	3.67	5.9	383.6	77.8	41	21	38	4.5	2.8	0.8	0.8	30	20	30	22	0.58	0.74	0.78	37.78	62.9	3.77	127.69	6.11	62.1727	68.04
313	9.1013	0	female	Han	NO	NO	NO	NO	NO	YES	NO	NO	YES	NO	61	178	80	25.25	85	60	5.62	2	5.85	0.87	1.59	5.2	357	67	36	20	34	4.8	3.3	0.9	0.9	33	30	35	24	0.86	0.73	1.18	31.25	63.39	4.63	170.38	8.6	87.0664	58.96
314	9.1013	0	female	Han	NO	NO	NO	NO	YES	NO	NO	NO	NO	NO	56	173	89	29.7371	189	95	5.04	2.23	2.55	1	2.09	6.9	530	84	31	18	43	5.4	3.5	0.9	0.9	29	18	34	24	0.68	0.86	0.79	35.19	90.44	7.33	210.815	2.03	103.26	64
315	9.1	0	male	Han	YES	YES	NO	NO	YES	NO	YES	NO	NO	NO	53	153	60	25.6316	146	103	8.77	1.28	4.49	1.21	2.75	2.01	246.15	52.06	30	20	30	4.8	3.1	1	1	28	19	32	23	0.87	0.62	1.4	35.42	69.6	5.5	198.394	7.25	128.128	64.73
316	9.0998	0	male	Han	YES	YES	NO	NO	YES	YES	YES	NO	NO	NO	45	175	83	27.103	158	90	6.68	1.68	3.19	0.81	3.75	15.3	538	184	27	18	42	4.5	2.9	0.9	0.9	26	17	35	23	0.55	0.71	0.77	35.56	60.24	3.86	151.679	7.19	76.7217	65.16
317	9.0933	0	male	Han	YES	YES	NO	YES	YES	NO	NO	YES	YES	NO	51	160	60	23.4384	127	68	8.92	1.25	3.24	1.01	4.11	9.08	176.42	54.76	31	23	34	4.6	3.2	0.9	0.9	29	20	30	23	0.77	0.3	2.57	30.43	56.38	4.28	157.8	7.19	99.1769	57.92
318	9.0918	0	male	Kazak	NO	NO	YES	YES	NO	NO	YES	YES	NO	NO	64	184	107	31.6053	114	70	3.49	3.19	4.99	0.86	3.43	6.4	475.7	69.8	30	20	40	5.2	3.5	1.4	1.4	26	18	35	23	0.82	0.59	1.39	34	74.11	5.26	372.648	6.37	161.529	62.68
319	9.0888	0	male	Han	NO	NO	NO	NO	NO	NO	NO	NO	NO	NO	41	174	83	27.4149	139	97	6.81	1.63	3.15	0.98	1.6	8.4	318	110	34	23	37	5	3.4	0.9	0.9	29	19	31	23	0.4	0.82	0.49	32	71	4.74	183.409	10	94.2494	60
320	9.0842	0	male	Han	YES	YES	NO	YES	NO	YES	NO	YES	NO	NO	83	160	75	29.2972	149	78	6.35	1.74	5.67	0.95	2.26	5.8	374.6	77.1	39	24	42	4.8	3.2	1	0.9	28	18	33	24	0.82	0.57	1.44	33.33	66.56	4.39	184.178	7.45	103.291	61.9
321	9.0805	1	male	Han	NO	NO	NO	YES	NO	YES	NO	NO	NO	NO	76	176	74	23.8895	136	78	4.53	2.43	4.4	0.83	2.99	5.5	456	53	30	20	36	5.1	3.5	1.4	1.3	29	19	35	23	0.72	0.64	1.13	33.33	66.56	5.46	341.977	8.58	185.283	63.69
322	9.0799	0	female	Han	NO	NO	NO	NO	YES	NO	NO	NO	NO	NO	50	155	59	24.5584	165	75	5.07	2.17	2.99	0.83	3.58	5.3	273	67	32	21	41	4	2.8	0.8	0.8	28	19	33	24	0.87	1.2	0.73	30	40.45	3.52	102.481	11.6	66.9764	57.79
323	9.0779	0	male	Han	YES	YES	NO	NO	NO	NO	NO	NO	NO	NO	44	168	71	25.1563	153	85	5.06	2.17	4.77	0.84	2.75	4.8	372.2	77.2	37	23	35	5.2	3.4	0.9	0.9	32	20	36	25	0.54	0.9	0.6	34.62	82.07	6.16	196.888	8.31	110.568	63.37
324	9.0726	0	female	Uygur	NO	NO	YES	NO	NO	NO	YES	YES	NO	NO	45	161	57	21.9902	171	103	5.01	2.18	4.33	1	4.63	5.1	311	60	30	18	29	4.2	2.8	1	1	25	18	30	20	0.72	0.63	1.14	35	45.39	3.31	157.21	10	101.972	64.84
325	9.0677	1	male	Kazak	YES	YES	YES	YES	NO	NO	NO	NO	YES	NO	52	174	88	29.0666	139	96	5.69	1.91	3.25	0.82	2.73	6.4	463.4	62.2	35	22	39	5.4	3.9	1.2	1.3	30	20	38	22	0.57	0.78	0.73	29.41	69.38	4.58	335.398	7.71	166.989	65.36
326	9.0643	0	female	Uygur	NO	NO	NO	NO	YES	YES	YES	NO	NO	NO	60	160	60	23.4377	169	77	4.73	2.29	4.86	0.94	4.19	5.3	296.9	57.6	30	21	30	4.5	3	0.9	0.9	26	18	32	23	0.65	0.41	1.59	33.33	57.45	3.85	151.679	7.65	95.3296	62.14
327	9.0642	0	male	Han	YES	YES	NO	YES	NO	YES	YES	NO	YES	NO	63	150	70	31.1112	130	68	5.47	1.98	4.02	1.15	3.02	3.3	274.2	58.1	31	21	31	5.1	3.4	0.9	0.9	26	30	31	24	0.59	0.72	0.84	33.33	76.37	5.27	190.092	8	114.645	61.68
328	9.0638	1	male	Han	YES	NO	NO	YES	YES	NO	YES	YES	YES	NO	70	177	105	33.516	172	82	5.23	2.07	2.15	1.28	0.72	5.3	509.1	118.3	39	21	40	5.5	3.7	1.3	1.3	29	18	35	21	0.63	0.77	0.82	34.62	82.07	5.91	366.069	6.92	163.475	59.01
329	9.0628	0	female	Han	NO	NO	YES	YES	NO	NO	YES	YES	NO	NO	78	184	110	32.4913	133	74	5.25	2.06	3.78	1.16	2.33	8	373.3	105.8	33	20	42	5.8	4	1.2	1.2	27	19	33	22	0.61	0.74	0.82	31.03	96.56	6.86	356.906	10.94	150.118	57.97
330	9.0616	0	female	Han	NO	NO	YES	YES	NO	YES	YES	NO	NO	NO	69	173	96	32.0769	153	85	12.86	0.84	3.21	1.2	1.25	6.92	303.73	81.11	33	21	42	5	3.3	1.1	1	29	20	38	24	0.62	0.81	0.77	34	74.11	4.97	228.627	8.86	108.746	62.68
331	9.0607	0	male	Han	NO	YES	NO	NO	NO	NO	NO	NO	NO	NO	38	165	75	27.5483	123	75	5.02	2.15	3.49	0.95	2.71	4.9	377.9	93.1	35	22	33	4.7	3.2	0.9	0.9	26	18	35	25	0.45	0.65	0.69	31.91	61.4	4.79	164.034	6.92	90.4467	59.98
332	9.0581	0	male	Han	NO	NO	NO	NO	NO	NO	YES	YES	NO	NO	54	178	90	28.4064	116	73	4.64	2.32	4.09	0.72	2.22	3.7	390	72				5	3.3	1.1	1.1					0.58	0.84	0.69	34	74.11	5.63	244.578	6.59	117.309	62.68
333	9.0554	1	male	Han	NO	NO	NO	YES	NO	YES	NO	NO	YES	NO	77	165	60	22.0392	162	68	9.94	1.08	3.75	0.85	3.8	9.98	207.74	83.6	33	20	32	4.8	3.4	1.3	1.2	29	20	33	28	0.56	0.66	0.85	31.11	54.33	4.36	275.962	9.4	172.089	61.29
334	9.0483	0	female	Han	NO	NO	NO	NO	NO	NO	NO	NO	NO	NO	62	155	89	37.0449	137	66	5.7	1.87	2.93	1.42	1.45	6.23	427.75	89.87	35	19	41	5.1	3.5	0.9	0.9	31	21	36	34	0.62	0.79	0.78	31.37	72.94	5.76	190.092	5.9	98.4017	58.91
335	9.0463	1	male	Han	YES	YES	NO	NO	NO	NO	NO	YES	NO	NO	49	168	75	26.5741	129	62	4.36	2.44	4.02	0.8	3.09	6.6	512	64	37	16	46	5.2	4.1	1.2	1.2	25	17	40	21	0.69		0.65	22.45	50.86	4.22	296.703	14.23	163.978	61.04
336	9.0439	0	male	Han	YES	NO	NO	NO	YES	NO	NO	NO	YES	NO	53	175	85	27.7554	137	88	6.76	1.57	4.6	0.37	3.35	12.3	423.3	100.98	34	23	35	5.1	3.6	0.9	0.9	30	19	33	22	1.06	0.89	1.19	29.41	69.38	5.97	190.092	11.44	96.147	56.04
337	9.0397	1	female	Han	NO	NO	YES	NO	NO	YES	NO	YES	NO	NO	74	168	58	20.5507	113	51	4.87	2.17	4.15	1.38	1.45	6.4	293	63	35	22	50	4.6	3	0.9	0.9	29	20	45	30	0.56		0.8	34.78	62.34	4.49	157.8	9.67	98.8167	64.04
338	9.0385	0	female	Han	NO	NO	NO	NO	NO	NO	NO	NO	NO	NO	62	178	85	26.8277	159	74	7.54	1.4	3.13	0.86	1.61	4.9	364	92	37	23	41	4.5	3	0.9	0.9	32	21	38	24	0.75	0.98	0.77	33.33	57.45	4.08	151.679	10	76.0143	62.14
339	9.0361	0	male	Han	YES	NO	YES	YES	NO	NO	NO	YES	YES	NO	60	160	63	24.6101	126	61	4.68	2.25	3.69	1.07	2.39	4.9	361	77				4.7	3.1	0.9	0.9					0.42	0.74	0.57	34.04	64.44	4.38	164.034	7.65	100.665	62.95
340	9.0321	0	male	Han	NO	NO	YES	YES	NO	NO	YES	YES	YES	NO	67	157	73	29.6165	152	81	5.7	1.84	5.19	0.89	2.77	5.2	234	58	36	26	33	4.7	3.1	0.9	0.9	24	17	37	23	0.77	0.89	0.87	34.04	64.44	4.83	164.034	11	94.3158	62.95
341	9.0311	0	male	Han	YES	YES	NO	NO	NO	NO	YES	NO	NO	NO	63	170	75	25.9523	138	82	4.03	2.6	3.46	1.24	3.74	5.2	319.7	92.3	32	17	35	4.9	3.2	1.1	1.1	29	16	31	18	0.53	0.77	0.69	36.17	67.36	5.46	236.272	7.57	129.706	65.81
342	9.0309	1	male	Kazak	YES	YES	NO	YES	NO	YES	NO	YES	YES	NO	71	173	90	30.0719	160	90	5.82	1.8	4.38	1.28	2.33	3.91	343.61	60.26	39	23	41	5.6	3.9	1.2	1.2	36	25	39	25	0.65	0.74	0.88	32.08	80.91	6.31	336.239	7.47	165.848	65.93
343	9.0275	0	male	Uygur	NO	NO	NO	NO	YES	YES	NO	NO	NO	NO	51	170	65	22.492	157	85	7.25	1.44	3.68	0.86	2.63	5.2	331	53	38	23	35	4.8	3.2	1	1	24	17	34	26	0.65	0.94	0.69	33.33	66.56	4.79	198.394	8	115.607	61.9
344	9.0209	1	male	Han	NO	NO	NO	NO	NO	YES	NO	YES	NO	NO	56	173	100	33.4125	190	100	6.03	1.72	4.79	0.87	3.59	3.9	365.6	67.1	37	26	49	6.3	4.5	1.2	1.1	38	25	42	24	0.84	0.92	0.91	30	101.42	9.33	387.849	13	180.194	62.14
345	9.0175	0	male	Han	NO	NO	YES	YES	YES	YES	NO	YES	YES	NO	63	152	60	25.97	112	60	3.4	3.04	2.52	0.89	3.84	9.18	419.06	72.75	32	22	35	4.6	3	0.9	0.9	28	19	36	22	0.45	0.68	0.66	34.78	62.34	4.61	157.8	6.43	102.315	64.04
346	9.0162	0	male	Uygur	YES	YES	NO	NO	NO	NO	NO	NO	NO	NO	33	175	78	25.47	112	89	2.79	3.7	2.87	0.8	1.64	3.71	324.51	69.06	29	22	41	4.8	2.9	1.2	1	27	20	30	22	0.68	0.74	0.92	39.58	75.31	4.9	228.104	9.07	119.239	70.04
347	9.0149	0	male	Han	NO	NO	NO	NO	NO	NO	NO	NO	NO	NO	24	176	98	31.6376	143	91	5.26	1.96	3.41	1.18	2.75	6.05	341.4	56.06	38	21	37	5	3.2	0.9	0.9	27	20	35	25	0.89	0.74	1.2	36	77.28	5.1	183.409	8.09	84.3222	65.36
348	9.0143	0	male	Other	YES	YES	NO	NO	NO	NO	NO	NO	NO	NO	41	150	55	24.4453	125	65	5.99	1.72	2.61	1.12	1.99	4.1	252.9	55.7	31	17	40	4.4	3	0.8	0.8	29	18	32	32	0.56	0.68	0.82	31.82	52.69	3.9	122.449	7.47	84.4706	60.09
349	9.0136	0	female	Han	NO	NO	NO	NO	YES	NO	NO	NO	NO	NO	44	158	59	23.6348	142	84	8.58	1.2	6.09	1.92	2.32	3.8	325.7	65.4	28	19	30	4.8	3.2	0.9	0.9	29	17	31	22	0.78	0.52	1.5	33.33	66.56	4.73	170.38	11.9	108.793	61.9
350	9.0133	0	female	Uygur	NO	NO	NO	NO	YES	NO	NO	YES	NO	NO	75	165	92	33.7929	143	90	5.75	1.79	7.1	0.74	3.43	3.4	377.3	74.8	33	18	37	5.3	3.5	0.9	0.9	26	17	35	22	0.8	0.69	1.16	33.96	84.47	6	203.795	2.03	100.332	62.41
351	9.0115	0	male	Han	NO	NO	NO	NO	NO	YES	NO	NO	NO	NO	53	163	70	26.3467	170	74	4.67	2.2	3.7	1	3.59	3.9	241.2	84.7	33	20	39	4.9	3.2	0.9	0.9	32	23	32	23	0.52	0.84	0.62	34.69	71.85	5.03	176.839	6.12	103.029	63.69
352	9.0053	0	female	Kazak	NO	NO	NO	NO	NO	NO	NO	NO	NO	NO	72	160	90	35.1565	125	79	8.04	1.27	4.45	1.03	1.61	3.52	226.85	49.64	28	21	35	5	3.2	0.9	0.9	32	19	39	25	0.9	1.08	0.83	36	77.28	5.41	183.409	10.59	94.1478	65.36
353	9.0007	0	male	Han	YES	YES	NO	NO	NO	YES	NO	YES	YES	NO	53	168	73	25.865	146	81	11.42	0.89	3.91	0.77	2.85	4.8	221.8	69.4	41	23	33	4.8	3	1	1	28	18	32	23	0.52	0.69	0.75	37.5	72.52	5.66	198.394	7.43	109.834	67.45
354	8.9964	0	female	Han	NO	NO	NO	YES	NO	YES	NO	NO	YES	NO	75	168	90	31.888	152	85	4	2.53	3.59	0.58	2.05	4.4	341	61	30	16	34	4.7	3	1.2	1.2	30	17	38	25	0.64	0.81	0.79	36.17	67.36	5.32	250.652	9.14	123.846	65.81
355	8.9936	1	male	Uygur	NO	NO	NO	YES	YES	YES	NO	YES	YES	NO	67	175	88	28.7354	122	56	5.34	1.89	5.01	0.95	2.1	6.66	354.47	107.82	35	21	37	5.1	3.5	1.3	1.2	29	19	35	25	0.89	1.02	0.87	33.33	66.56	4.59	304.978	12.87	151.384	63.69
356	8.9933	0	male	Han	YES	NO	NO	NO	YES	NO	NO	NO	NO	NO	48	174	78	25.7632	110	76	6.91	1.46	2.74	0.86	1.56	6.4	295	77	31	20	34	5	3.6	0.9	0.9	27	19	31	22	0.99	0.67	1.48	28	63.81	4.85	183.409	10.42	96.1819	53.97
357	8.9918	0	female	Han	NO	NO	NO	YES	YES	NO	YES	NO	YES	YES	67	174	84	27.7457	162	102	3.92	2.57	3.57	0.88	2.24	5.1	346	77	34	19	35	4.5	2.9	0.9	0.9	27	18	35	24	0.82	0.55	1.49	35.56	60.24	6.81	151.679	6.33	76.4626	65.16
358	8.9909	1	male	Han	YES	NO	YES	YES	NO	YES	YES	YES	YES	NO	61	171	80	27.3592	135	100	5.47	1.84	4.3	0.7	3.58	7.6	376.2	128	35	21	39	5.4	3.7	1.3	1.2	30	20	35	24	0.72	0.89	0.81	33.33	76.37	6.11	335.398	10.6	177.44	64.04
359	8.9903	0	female	Han	NO	NO	NO	NO	YES	NO	NO	NO	NO	NO	64	163	68	25.5938	103	70	4.79	2.1	3.96	1	2.77	5.1	362.3	144.2				4.5	3	0.8	0.8					0.56	0.79	0.71	33.33	57.45	4.31	127.69	8.4	74.5941	62.14
360	8.9879	0	male	Han	NO	NO	NO	NO	YES	YES	NO	YES	YES	NO	62	166	77	27.9434	123	72	4.52	2.22	3.45	0.93	4.4	4.4	312.1	67.8	30	16	33	4.9	3.2	0.9	0.9	25	16	32	21	0.78	0.91	0.86	34.69	71.85	5.17	176.839	9.75	95.8319	63.69
361	8.9834	0	female	Han	NO	NO	NO	YES	NO	YES	YES	NO	NO	NO	61	158	58	23.2341	138	60	4.97	2.01	2.11	1.29	1.76	3.3	232	46	29	17	32	4.6	3	0.9	0.9	25	16	35	21	0.47	0.7	0.67	34.78	62.34	4.68	157.8	7.23	101.59	64.04
362	8.9813	0	male	Uygur	NO	YES	NO	YES	NO	NO	YES	YES	NO	NO	57	185	83	24.2516	218	105	7.02	1.42	3.06	1.06	1.69	6.3	394.1	82.6	33	20	35	4.9	3.2	1.2	1.2	33	19	34	25	0.57	0.88	0.65	34.69	71.85	5.82	268.623	8.77	131.807	63.69
363	8.9808	0	male	Han	NO	YES	NO	YES	NO	YES	YES	NO	NO	NO	48	154	56	23.613	150	85	4.7	2.12	4.68	1.07	2.33	3.6	363.1	61.7	34	20	34	5.1	3.3	0.8	0.8	28	19	32	24	0.46	0.72	0.64	35.29	79.68	6.29	161.236	7.22	107.255	64.36
364	8.9808	0	male	Kazak	YES	NO	NO	NO	NO	YES	NO	NO	YES	NO	54	170	70	24.2223	129	87	3.61	2.76	4.19	0.82	2.94	9.19	480.11	139.29	40	20	38	5.3	3.6	0.9	0.9	29	19	37	24	0.72	0.54	1.33	32.08	80.91	6.47	203.795	8	114.485	59.78
365	8.9764	1	male	Kazak	NO	NO	NO	YES	NO	YES	YES	YES	YES	NO	63	175	90	29.3887	122	72	4.96	2	4.77	0.98	2.01	5.8	433.3	72	30	20	38	4.7	3.2	1.4	1.3	28	20	38	26	0.56	0.83	0.67	34.09	55.48	3.38	299.857	8.47	147.018	64.73
366	8.9733	1	female	Han	NO	NO	YES	YES	NO	NO	YES	YES	YES	NO	69	150	60	26.6669	123	71	5.02	1.97	4.03	1.03	0.61	5.8	260	52	33	19	45	5	3.4	0.9	0.9	26	16	43	25	1.33		2.45	32	70.8	5.24	183.409	12.6	121.294	59.88
367	8.9701	0	male	Han	NO	NO	NO	NO	YES	NO	NO	NO	NO	NO	33	145	51	24.2571	119	57	5.3	1.86	4.15	1.04	2.74	4.6	247	55	30	20	31	4.6	3	0.9	0.9	27	16	33	24	0.64	0.82	0.78	34.78	62.34	4.92	157.8	9.14	113.985	64.04
368	8.9679	0	male	Other	NO	NO	NO	YES	NO	YES	NO	YES	YES	NO	50	180	102	31.4825	160	61	5.26	1.87	4.09	0.83	3.39	8.6	505	81	33	18	39	5.1	3.4	1.3	1.3	31	18	34	20	0.63	0.84	0.75	34.69	71.85	6.11	323.237	7.41	145.596	63.69
369	8.9627	0	female	Han	NO	NO	NO	NO	NO	YES	NO	NO	NO	NO	81	160	72	28.1252	132	75	3.02	3.24	3.28	1.11	2.48	4.7	178.4	59.3	30	19	33	4.5	3	0.9	0.9	27	18	32	19	1.05	0.82	1.28	33.33	57.45	4.48	151.679	8.75	88.0267	62.14
370	8.9623	1	male	Han	NO	NO	NO	NO	YES	NO	NO	NO	NO	NO	48	176	83	26.7958	130	102	5.72	1.71	3.7	0.43	3.43	6.47	413.66	69.47	33	22	39	5.4	4	1.2	1.2	31	20	36	24	0.52		0.62	27.45	65.68	10.25	316.172	7.22	161.46	58.82
371	8.9595	0	male	Uygur	NO	YES	NO	NO	NO	NO	NO	NO	NO	NO	50	163	75	28.2293	134	68	3.81	2.56	4.63	1.01	2.87	4.4	278	48	32	18	35	4.6	3.1	0.9	0.9	26	17	36	21	0.62	0.83	0.75	32.61	59.42	4.75	157.8	6.89	87.5987	61.04
372	8.9592	0	female	Uygur	NO	NO	NO	NO	NO	YES	NO	NO	NO	NO	49	158	67	26.8395	187	82	4.9	1.99	4.93	1.1	2.63	5.5	203.3	72.5	28	17	40	4.8	3.2	1.1	1	23	17	35	26	1.07	0.71	1.51	33.33	66.56	6.32	213.034	7.64	127.68	61.9
373	8.9577	0	female	Uygur	NO	NO	NO	YES	NO	YES	NO	NO	NO	NO	57	176	92	29.7012	137	74	5.47	1.78	2.54	0.8	3.23	6.5	313.5	62.2	39	23	39	5.2	3.6	0.9	0.9	31	22	32	23	0.51	0.56	0.91	30.77	75.08	5.56	196.888	7.85	93.832	57.97
374	8.9552	0	male	Han	NO	NO	NO	NO	NO	NO	NO	NO	NO	NO	16	174	80	26.424	151	74	6.07	1.6	2.99	0.81	3	3.9	375.5	71.6	34	23	32	4.3	2.8	0.9	0.9	25	18	31	23	0.84	0.96	0.88	34.88	53.52	4.01	139.773	10	72.3275	64.43
375	8.9551	1	male	Han	NO	NO	NO	YES	YES	NO	NO	YES	YES	NO	50	173	89	29.7377	128	81	4.98	1.95	3.28	0.88	3.12	4.9	322	62	34	20	34	5.5	3.7	1.3	1.2	30	20	35	25	0.52	0.71	0.73	34.62	82.07	5.83	345.85	6.47	171.646	60.88
376	8.9542	0	male	Han	YES	YES	NO	NO	YES	YES	YES	NO	NO	NO	45	175	83	27.1025	158	90	5.88	1.65	4.14	0.81	2.28	15.3	538	184	27	18	42	4.5	2.9	0.9	0.9	26	17	35	23	0.55	0.71	0.77	35.56	60.24	3.86	151.679	8	77.7004	65.16
377	8.9542	0	male	Uygur	YES	YES	NO	YES	YES	YES	YES	NO	YES	NO	67	155	56	23.3094	102	60	3.79	2.56	6.18	1.35	3.59	4.9	203	51.9	36	22	33	4.5	3	0.9	0.8	30	20	34	25	0.86	0.6	1.43	33.33	57.45	3.79	139.491	6.88	92.4149	62.14
378	8.9494	1	male	Uygur	NO	NO	YES	YES	NO	YES	YES	YES	YES	NO	55	173	89	29.7379	114	57	7.1	1.36	3.48	0.64	1.53	3.9	237.2	53.8	33	25	42	6	4.4	1.2	1.2	29	18	32	26	0.62	0.49	1.27	28.07	85.82	7.29	378.172	9.8	187.688	64.95
379	8.9482	0	male	Uygur	YES	NO	NO	NO	YES	NO	YES	NO	NO	NO	50	160	80	31.2507	170	71	5.81	1.66	3.84	1.02	2.34	4.1	350.3	66.6				4.4	2.9	0.9	0.9					0.55	0.77	0.71	34.09	55.48	4.27	145.67	8.4	78.864	63.27
380	8.9477	0	male	Han	YES	YES	NO	NO	NO	YES	NO	NO	NO	NO	46	173	93	31.0737	209	115	5.54	1.74	4.04	0.83	3.55	5	349.9	76.7	32	19	36	5.1	3.3	1	1	27	17	34	23	0.65	0.7	0.93	35.29	79.68	5.9	220.67	6.11	105.443	64.36
381	8.9459	0	male	Uygur	YES	NO	YES	YES	NO	NO	NO	NO	YES	NO	54	172	73	24.6758	181	116	5.66	1.7	5.09	0.98	2.2	3.4	308	63	41	22	30	5	3.4	0.9	0.9	30	20	33	20	0.85	0.74	1.15	32	70.8	5.17	183.409	10	100.185	59.88
382	8.9457	0	male	Han	NO	NO	NO	YES	YES	NO	NO	NO	YES	NO	65	160	75	29.2972	161	81	7.4	1.3	2.78	0.83	3.24	4.1	375.4	57.7	34	24	31	4.4	2.8	0.9	0.9	23	17	34	25	0.6	0.96	0.63	36.36	58.14	3.95	145.67	7.19	81.6947	66.3
383	8.9448	0	male	Uygur	NO	NO	NO	NO	NO	NO	NO	NO	NO	NO	47	161	67	25.8484	143	87	5.79	1.66	4.07	1.18	1.7	6.9	190	31				5.2	3.5	0.9	0.9					0.86	1.13	0.76	32.69	78.64	4.95	196.888	11.6	116.723	60.72
384	8.9441	0	male	Han	YES	YES	NO	NO	NO	YES	NO	NO	YES	NO	65	170	75	25.9519	116	65	4.14	2.32	3.46	1.16	2.09	3.2	243	54	35	23	36	4.5	3	0.9	0.9	28	18	35	25	0.81	0.55	1.47	33.33	57.45	4.02	151.679	8.4	82.2509	62.14
385	8.9436	0	male	Han	YES	YES	NO	NO	NO	NO	NO	NO	NO	NO	28	155	49	20.3961	113	60	6	1.6	2.26	0.49	2.07	6.83	161.68	34.06	31	20	43	4.4	2.8	0.8	0.8	24	16	32	21	1.56	1.18	1.32	36.36	58.14	3.66	122.449	11.9	87.1459	66.3
386	8.9423	0	female	Han	NO	NO	NO	NO	NO	YES	YES	NO	NO	NO	55	174	85	28.076	152	68	6.03	1.59	3.01	0.71	3.66	5.8	332.8	95.2	35	23	40	5.3	3.5	1	1	32	23	34	27	1.01	0.93	1.09	33.96	84.47	6.76	236.146	10.1	118.28	62.41
387	8.9396	1	male	Han	YES	NO	NO	YES	NO	YES	YES	NO	YES	NO	71	165	64	23.5088	120	64	6.09	1.57	3.84	0.67	2.01	9.8	364.6	93.6	34	21	35	5.1	3.5	1.2	1.2	31	20	36	31	0.52	0.77	0.68	33.33	66.56	4.93	287.193	7.93	173.677	65.93
388	8.9374	0	male	Han	NO	NO	YES	NO	YES	NO	NO	NO	NO	NO	50	153	57	24.35	108	107	5.33	1.79	3.26	0.97	2.82	6.4	310	75	27	16	38	4.5	3.1	0.9	0.9	25	17	36	25	0.81			31.11	54.53	3.65	151.679	12	100.45	58.98
389	8.9356	0	female	Han	NO	NO	NO	YES	NO	NO	YES	NO	NO	NO	74	175	60	19.5924	120	80	4.96	1.92	3.51	1.03	1.45	7.7	385	65				5	3.3	1.3	1.2					0.87	0.66	1.32	34	74.11	5.48	295.15	4	175.413	62.68
390	8.9332	0	male	Han	YES	YES	NO	YES	YES	NO	NO	NO	NO	NO	51	160	60	23.4381	127	68	8.12	1.17	2.55	1.01	3.59	9.08	176.42	54.76	31	23	34	4.6	3.2	0.9	0.9	29	20	30	23	0.77	0.3	2.57	30.43	56.38	4.28	157.8	6.13	100.312	57.92
391	8.9319	1	male	Han	NO	NO	NO	NO	YES	YES	NO	NO	NO	NO	35	182	123	37.1335	163	90	4.54	2.09	3.63	0.76	3.26	87	449	87	30	20	37	5.7	3.9	1.2	1.2	29	19	31	26	1.13	0.54	2.09	33.33	86.88	6.95	346.498	11.94	138.888	61.9
392	8.9311	0	male	Han	YES	YES	YES	YES	NO	YES	NO	YES	NO	NO	56	158	58	23.2339	148	78	4.14	2.29	3.6	1.42	1.84	6	157.1	63.7	28	18	28	4.5	2.9	0.9	0.9	27	16	31	21	1.02	0.69	1.48	35.56	60.24		151.679	7.85	97.6494	65.16
393	8.9238	0	male	Uygur	NO	YES	NO	YES	NO	NO	YES	YES	NO	NO	57	185	83	24.252	218	105	6.82	1.38	5.84	1.06	2.86	6.3	394.1	82.6	33	20	35	5.1	3.4	1.4	1.4	33	19	34	25	0.57	0.88	0.65	34.69	71.85	5.82	361.204	8.77	179.427	63.69
394	8.9224	0	male	Uygur	YES	NO	NO	NO	YES	NO	NO	NO	NO	NO	39	175	72	23.5103	105	60	5.31	1.77	3.88	0.98	2.07	5.8	333	90	35	23	37	4.8	3.3	1	0.9	31	21	36	24	0.68	0.88	0.77	31.25	63.39	4.63	184.178	8.5	100.304	58.96
395	8.9214	1	male	Han	YES	NO	NO	NO	NO	NO	NO	YES	YES	NO	57	172	71	23.9997	142	79	4.84	1.94	4.84	0.82	2.68	5.8	347	66	29	19	32	4.8	3.3	1.2	1.2	28	19	29	19	0.48	0.65	0.74	33.33	57.45	3.62	259.562	6.65	145.511	63.27
396	8.9186	1	male	Han	NO	NO	NO	NO	YES	YES	NO	YES	NO	NO	76	165	52	19.101	100	60	9.09	1.03	3.98	1.27	3.46	4.83	202.37	71.64	32	15	34	5	3.4	1.2	1.2	26	16	28	23	0.65	0.95	0.68	34.04	64.44	4.96	277.833	9.67	184.779	63.69
397	8.9153	0	female	Uygur	NO	NO	NO	NO	NO	NO	YES	NO	NO	YES	70	170	78	26.9904	120	88	4.62	2.02	3.09	1.05	2.35	4.7	377	65				5.1	3.4	0.9	0.8					0.68	0.6	1.13	33.33	76.37	4.81	175.452	8.4	93.2017	61.68
398	8.9151	0	male	Han	NO	NO	NO	NO	NO	YES	YES	NO	NO	NO	84	170	94	32.5267	111	93	8.56	1.09	3.06	0.94	2.28	3.66	346.18	57.76	34	23	46	5	3.4	0.9	1	31	21	48	29	0.8			32	70.8	5.31	198.049	10	94.883	59.88
399	8.915	1	male	Han	NO	YES	NO	YES	NO	YES	NO	YES	YES	NO	81	158	54	21.632	118	66	4.38	2.13	4.94	0.88	2.76	8.23	388.4	119.65	34	20	34	4.9	3.3	1.2	1.2	26	19	33	24	0.42	1.01	0.42	34.78	62.34	4.36	268.623	7	180.781	69.74
400	8.9103	0	male	Han	YES	YES	NO	NO	YES	NO	YES	NO	NO	NO	61	167	67	24.0244	176	83	4.38	2.12	3.72	1.1	2.14	6.2	196	45	32	21	40	4.9	3.2	0.9	0.9	28	18	34	26	0.69	0.63	1.1	34.69	71.85	5.53	176.839	6.57	102.61	63.69
401	8.9063	0	female	Han	NO	NO	NO	YES	NO	YES	YES	YES	YES	NO	75		81		115	89	3.67	2.52	3	1.14	4.16	4.3	445	59	35	21	38	4.7	3.3	1.2	1.1	30	20	33	23	0.68	0.57	1.19	31.11	54.53	4.04	235.144	6.8	273.551	58.98
402	8.9059	1	male	Kazak	YES	NO	NO	YES	NO	YES	YES	YES	YES	NO	56	172	81	27.3804	112	72	4.3	2.15	2.34	0.58	1.76	3.8	425	63	33	18	38	4.7	3.2	1.2	1.2	31	19	32	25	0.65	0.78	0.83	34.09	55.48	3.99	250.652	15.44	131.314	67.82
403	8.8984	0	male	Uygur	YES	NO	NO	NO	NO	YES	YES	NO	NO	NO	51	167	84	30.1199	158	76	5.92	1.55	2.75	0.94	3.35	3.6	289	62.8	32	22	33	5.2	3.5	0.9	0.9	30	20	33	23	0.8	1.14	0.7	32.69	78.64	6.06	196.888	8.89	101.436	60.72
404	8.8962	0	female	Han	NO	NO	NO	NO	YES	YES	YES	YES	NO	NO	50	168	69	24.4478	134	63	4.51	2.03	3.07	0.94	1.18	12.4	372.3	234.4	30	17	35	4.9	3.1	0.8	0.8	24	16	36	24	0.86	0.72	1.19	36.73	74.89	5.77	149.655	7.48	85.2687	66.39
405	8.8952	0	male	Han	NO	NO	NO	NO	YES	NO	NO	YES	NO	NO	37	170	72	24.9139	120	62	5.51	1.66	3	1.41	4.67	5.3	349.4	71.7	30	18	40	5.2	3.3	1	1	31	21	32	21	0.52	0.6	0.87	36.54	85.38	5.81	228.346	6.12	126.458	65.93
406	8.8942	0	male	Other	YES	NO	NO	NO	YES	YES	YES	YES	NO	NO	52	165	80	29.3855	182	109	3.99	2.29	3.72	1.26	2.54	3.6	354.9	75.2	34	19	36	5	3.3	0.9	0.9	29	19	38	22	0.67	0.85	0.79	34	74.11	6.45	183.409	6.38	97.6828	62.68
407	8.8921	0	female	Han	NO	NO	NO	NO	NO	YES	YES	YES	NO	NO	48	169	61	21.3583	131	81	5.01	1.82	3.26	0.99	2.78	6	208	56				4.2	2.7	0.9	0.9					0.5	0.86	0.58	35.71	51.56	5.36	133.988	2.03	80.7743	65.61
408	8.8916	0	male	Han	YES	YES	NO	YES	NO	NO	NO	YES	YES	NO	55	170	65	22.4914	132	94	4.98	1.83	3.47	1.06	0.91	4.6	286.9	67.1	30	22	33	5.2	3.4	1	0.9	28	19	34	23	0.62	0.72	0.86	34.62	82.07	6.4	212.395	6.53	123.766	63.37
409	8.8914	0	female	Han	NO	NO	NO	NO	YES	NO	NO	NO	NO	NO	51	160	78	30.4693	172	89	6.7	1.36	3.24	0.89	2.17	6.7	307.2	67.7	31	17	30	4	2.5	0.9	0.9	30	18	31	20	0.45	0.61	0.74	37.5	47.68	3.53	122.756	8.4	67.3931	68.11
410	8.8902	0	male	Han	YES	YES	NO	YES	YES	YES	NO	NO	YES	NO	48	159	82	32.4357	170	78	7.11	1.28	5.4	1.67	1.64	3.9	276	37				4.5	3	1.1	1					0.78	1.21	0.64	33.33	57.45	3.73	190.626	7.65	102.125	62.14
411	8.8884	0	male	Han	NO	NO	NO	NO	YES	NO	YES	YES	NO	NO	76	172	73	24.6757	159	106	3.34	2.72	4.94	1.13	5.87	7.2	458.9	90	36	20	31	4.8	3.2	1.1	1.1	26	16	31	23	0.7	0.45	1.56	33.33	66.56	5.13	228.104	5.83	124.6	61.9
412	8.8876	1	male	Han	YES	NO	YES	YES	NO	YES	YES	YES	YES	YES	60	175	60	19.5924	120	72	6.53	1.39	2.93	0.84	1.83	5.8	260	72	35	21	32	5.4	3.8	1.2	1.2	29	19	34	24	0.63	0.82	0.77	31.37	72.94	5.84	316.172	7.3	189.938	68.04
413	8.8781	0	female	Han	NO	NO	NO	YES	NO	NO	NO	NO	NO	NO	74	175	60	19.592	120	80	4.86	1.85	2.44	1.03	3.52	7.7	385	65	32	20	36	5.2	3.5	1.5	1.4	24	17	28	19	0.87	0.66	1.32	34	74.11	5.48	392.866	7.74	236.012	62.68
414	8.8773	0	female	Uygur	NO	NO	NO	NO	NO	NO	NO	NO	NO	NO	55	178	110	34.7184	143	87	5.58	1.61	3.78	1.05	2.48	5	437	72				4.9	3.2	1.1	1.1					0.61	0.92	0.66	34.69	71.85	5.46	236.272	7.43	100.932	63.69
415	8.8766	0	female	Han	NO	NO	NO	NO	YES	YES	NO	NO	NO	NO	49	170	94	32.526	160	87	5.83	1.54	2.16	0.85	1.76	4.6	276	69.8	43	24	39	5.2	3.6	1.2	1.1	34	23	39	30	0.49	0.67	0.73	30.77	75.08	5.56	278.918	6.53	133.626	57.97
416	8.8742	0	female	Uygur	NO	NO	NO	NO	NO	YES	YES	NO	NO	NO	34	174	85	28.0755	135	87	5.06	1.77	4.54	1.04	1.95	4.2	463	71				4.9	3.2	1	0.9					0.66	0.87	0.76	34.69	71.85	5.6	191.054	10	95.6946	63.69
417	8.8653	1	male	Uygur	NO	NO	NO	YES	NO	NO	NO	NO	NO	NO	54	162	50	19.0524	101	69	5.84	1.52	3.7	1.08	2.05	3.2	237.4	67.4	30	20	33	4.7	3.2	1.2	1.2	27	17	34	23	0.65	0.77	0.84	34.09	55.48	4.33	250.652	7.84	171.644	66.92
418	8.8639	0	female	Uygur	NO	NO	NO	YES	NO	NO	YES	YES	NO	NO	61	155	55	22.8936	152	87	3.49	2.54	3.82	0.69	5.27	2.9	269	46	28	21	35	4.7	3.1	0.9	0.9	25	18	31	28	0.71	1.09	0.65	34.04	64.44	4.58	164.034	9.47	110.826	62.95
419	8.8632	0	female	Han	NO	NO	NO	NO	NO	YES	YES	NO	NO	NO	51	172	71	24.0003	167	84	5.15	1.72	1.68	0.88	1.77	6.1	328.5	103.6	35	23	38	5.1	3.3	0.9	0.9	30	20	32	25	1.25	1.04	1.2	35.29	79.68	6.37	190.092	11.9	105.308	64.36
420	8.8629	0	female	Han	NO	NO	NO	YES	NO	NO	YES	YES	YES	NO	71	162	69	26.2919	160	110	3.6	2.46	3.84	0.75	2.39	5.6	338.4	50	35	19	34	4.9	3.2	1.3	1.2	29	18	35	24	0.62	0.79	0.78	34.69	71.85	5.68	285.478	8.86	166.12	63.69
421	8.8624	1	male	Han	NO	NO	YES	YES	NO	NO	NO	YES	YES	NO	81	168	67	23.7394	147	77	5.3	1.67	5.9	1.01	3.93	8	315.7	117.5	34	21	44	5.2	3.5	1.3	1.2	30	20	35	25	0.66	1.11	0.59	34.69	71.85	5.75	314.962	10.43	184.253	64.43
422	8.861	0	male	Han	YES	YES	NO	NO	NO	YES	NO	NO	YES	NO	67	156	72	29.5863	142	78	4.83	1.83	3.89	0.91	4.15	7.2	284.5	84.8				4.7	3	0.8	0.8					0.75	1.01	0.74	36.17	67.36	4.24	138.473	8.4	80.4935	65.81
423	8.8597	0	male	Kazak	YES	NO	NO	NO	NO	NO	NO	NO	YES	NO	54	170	70	24.2217	129	87	3.21	2.75	2.67	0.82	2.24	9.19	480.11	139.29	40	20	38	5.5	3.8	1.1	1.1	29	19	37	24	0.72	0.54	1.33	32.08	80.91	6.47	288.164	8	163.814	59.78
424	8.8596	0	male	Han	YES	YES	NO	YES	NO	YES	NO	YES	NO	NO	50	170	80	27.6819	153	78	6.26	1.41	3.39	0.58	2.37	5	236.5	64.7	43	25	40	5.7	3.9	0.9	0.9	29	20	35	26	0.63	1.19	0.53	31.58	94.13	6.78	232.549	9	121.875	58.82
425	8.8588	0	female	Han	NO	NO	NO	NO	YES	NO	NO	NO	NO	NO	61	168	65	23.0307	123	91	5.69	1.55	3.88	1.19	2.14	7.8	491	138	34	19	32	4.4	3	1	1	31	19	33	23	0.69	0.5	1.38	33.33	49.03	3.53	170.438	5.75	101.186	62.4
426	8.8584	0	male	Han	YES	YES	NO	NO	NO	NO	NO	NO	NO	NO	55	160	67	26.1728	162	82	5.8	1.52	2.08	0.89	1.7	3.8	351.3	63.3	27	20	35	4.9	3.2	0.8	0.8	25	16	32	21	0.98	0.61	0.61	34.69	71.85	5.6	149.655	2.03	89.0433	63.69
427	8.8567	0	male	Kazak	YES	YES	NO	NO	NO	YES	NO	NO	YES	NO	42	158	59	23.6343	134	59	5.57	1.58	3.99	1.21	1.88	4.3	330	65	31	19	35	4.4	2.9	0.9	0.9	26	19	33	23	0.66	0.58	1.14	34.09	55.48	3.99	145.67	6.95	94.0776	63.27
428	8.8556	0	male	Other	YES	YES	YES	NO	NO	YES	YES	NO	NO	NO	46	175	60	19.5921	154	109	2.98	2.95	2.96	0.69	2.26	4.7	316	66	36	21	40	4.9	3.2	1.1	1	31	20	35	23	0.98	0.56	1.75	34.69	71.85	5.39	220.765	7	131.205	63.69
429	8.8548	0	female	Han	NO	NO	NO	NO	NO	NO	NO	NO	NO	NO	62	155	89	37.0449	137	66	4.8	1.83	3.22	1.42	1.88	6.23	427.75	89.87	35	19	41	5.1	3.5	0.9	0.9	31	21	36	34	0.62	0.79	0.78	31.37	72.94	5.76	190.092	5.9	99.7808	58.91
430	8.8541	0	male	Han	NO	NO	YES	YES	NO	YES	NO	NO	NO	NO	69	178	105	33.1398	170	115	4.18	2.1	4.42	0.81	2.91	4.5	411	56				5	3.3	1	0.9					0.64	0.81	0.79	34	74.11	5.04	198.049	6.33	86.982	62.68
431	8.8534	0	male	Han	YES	YES	YES	YES	NO	NO	YES	YES	NO	NO	51	175	96	31.3478	152	89	4.3	2.04	2.87	0.78	1.45	6.6	333	76	39	26	40	5	3.3	1.3	1.2	28	20	36	26	0.51	0.69	0.74	34	74.11	5.78	295.15	9.27	137.702	62.68
432	8.8495	0	female	Other	NO	NO	NO	NO	NO	NO	YES	NO	NO	NO	61	158	53	21.231	164	94	5.11	1.71	3.85	1.37	1.82	4.3	249.3	77.2	33	22	35	4.7	3.1	0.9	0.9	30	20	36	25	0.76	0.96	0.79	34.04	64.44	4.77	164.034	10.13	110.142	62.95
433	8.8488	1	male	Han	NO	NO	NO	YES	NO	YES	NO	NO	YES	YES	84	165	65	23.8755	145	62	4.41	1.98	4.3	0.6	1.77	2.9	563.9	75.4	44	23	41	5.3	3.5	1	0.9	30	20	36	26	0.56	0.8	0.7	33.96	84.47	6.17	219.746	8	131.892	62.41
434	8.8477	0	female	Uygur	NO	NO	NO	NO	NO	NO	NO	NO	NO	NO	61	167	85	30.4783	127	76	4.45	1.96	4.87	0.86	3.23	7.9	376.6	104.9	40	20	34	5.1	3.4	1.2	1.2	28	18	33	22	0.75	0.69	1.09	34.69	71.85	5.53	287.193	5.56	148.936	63.69
435	8.8475	0	male	Kazak	NO	NO	NO	NO	YES	NO	YES	NO	NO	NO	58	160	63	24.6098	140	73	4.36	2	5.09	0.77	1.51	3.4	259.8	63.1	32	26	31	4.3	3	0.9	0.9	25	18	29	21	0.52	0.87	0.6	30.23	48.07	3.65	139.773	8.4	85.7766	57.87
436	8.8433	0	female	Han	NO	NO	NO	NO	NO	NO	NO	NO	NO	NO	57	165	70	25.7126	156	87	5.2	1.67	4.99	1.07	2.63	4.6	458.9	79.1	32	19	32	4.8	3.2	1.1	1.1	30	18	34	19	0.66	0.91	0.73	34.78	62.34	4.36	228.104	10.31	131.959	64.04
437	8.8424	0	male	Uygur	YES	YES	NO	NO	NO	NO	NO	NO	NO	NO	33	175	78	25.4701	112	89	2.39	3.63	3.96	0.8	2.34	3.71	324.51	69.06	29	22	41	4.8	2.9	1.2	1	27	20	30	22	0.68	0.74	0.92	39.58	75.31	4.9	228.104	9.07	120.716	70.04
438	8.8424	0	female	Han	NO	NO	NO	NO	YES	NO	NO	NO	NO	NO	43	180	80	24.6923	138	68	5.29	1.64	5.4	1.11	1.12	4.8	332	91	35	20	40	5.5	3.5	0.9	0.9	30	20	35	23	0.77	0.7	1.1	36.36	96.55	5.6	217.948	7.78	110.684	65.49
439	8.8364	1	male	Kazak	NO	NO	NO	YES	NO	NO	NO	NO	YES	NO	82	180	87	26.852	148	78	5.39	1.6	3.91	0.86	3.01	6.2	419.8	87.5	38	23	38	5.2	3.6	1.2	1.2	28	19	35	19	0.56	1.13	0.5	32.65	68.68	5.91	296.703	6.89	145.972	63.69
440	8.8352	0	female	Han	NO	NO	NO	NO	NO	NO	NO	NO	NO	NO	67	159	74	29.271	122	73	4.51	1.91	2.22	0.95	3.07	3.8	322.2	63.3	32	18	35	5.4	3.5	0.9	0.9	33	18	33	23	0.57	0.79	0.72	35.19	90.44	6.42	210.815	7.6	119.496	64
441	8.831	0	female	Han	NO	NO	NO	NO	YES	NO	NO	NO	NO	NO	33	155	68	28.3047	127	67	5.57	1.54	4.38	0.98	4.06	4.8	279.8	79.8	31	19	32	4.5	3	0.9	0.9	29	20	34	23	0.9	0.98	0.92	33.33	57.45	5.06	151.679	6.33	91.208	62.14
442	8.829	0	female	Han	NO	NO	YES	YES	YES	NO	YES	YES	YES	NO	56	160	60	23.4384	149	76	4.92	1.74	5.82	1.52	2.14	3.9	301.9	44				4.1	2.6	0.9	0.9					0.88	1.26	0.7	36。59	49.61	4.61	128.316	8.4	80.6463	66.84
443	8.8289	0	male	Uygur	YES	NO	NO	YES	NO	YES	NO	YES	NO	NO	61	164	60	22.3083	144	94	6.74	1.27	3.74	1.47	1.88	5.45	290.48	59.68	30	20	31	4.7	3.1	0.9	0.9	28	17	34	22	0.76	1.02	0.75	34.04	64.44	4.83	164.034	2.03	101.538	62.95
444	8.8271	0	male	Han	NO	NO	NO	NO	NO	YES	YES	NO	NO	NO	84	170	94	32.5267	111	93	8.46	1.01	2.86	0.94	2.23	3.66	346.18	57.76	34	23	46	5	3.4	0.9	1	31	21	48	29	0.8		1.05	32	70.8	5.31	198.049	9.88	96.1825	59.88
445	8.826	1	male	Han	YES	YES	NO	NO	YES	NO	NO	NO	NO	NO	64	184	79	23.3351	141	79	5.05	1.69	4.04	0.94	2.48	6.4	362	65	30	17	32	4.9	3.2	1.3	1.3	26	16	30	17	0.58	0.84	0.69	36.96	65.13	4.95	302.795	7.12	154.724	58.98
446	8.8253	0	female	Han	NO	NO	YES	NO	NO	YES	YES	NO	NO	NO	70	175	81	26.4494	135	94	4.93	1.73	2.41	1.01	3.01	7.1	320	66	37	23	37	4.9	3.2	1	1	30	20	36	26	0.82	0.58	1.41	34.69	71.85	5.6	205.694	6.11	105.409	63.69
447	8.8222	0	male	Uygur	YES	NO	NO	NO	NO	NO	YES	NO	NO	NO	64	155	51	21.2286	135	72	4.75	1.79	3.9	1.01	1.99	5.1	206	44	33	23	44	4.6	3	0.9	0.9	28	20	29	23	0.86	0.6	1.43	34.78	62.34	4.8	157.8	13.23	109.174	64.06
448	8.8211	0	male	Han	NO	YES	NO	NO	YES	NO	NO	NO	NO	NO	25	159	52	20.5695	147	71	11.03	0.77	4.04	1.26	5.27	4.2	182	56	31	21	30	4.4	2.8	0.8	0.8	22	18	32	22	0.63	0.74	0.85	36.36	58.14	4.24	122.449	7.19	82.5905	66.3
449	8.8194	0	male	Uygur	NO	NO	NO	YES	YES	NO	YES	YES	YES	NO	67	176	69	22.2759	122	76	5.47	1.55	4.37	1.15	2.13	9.9	397.4	94.8	34	26	42	4.8	3.2	1.3	1.2	27	18	32	21	0.68			33.33	66.56	4.86	275.962	8.5	152.981	61.9
450	8.818	0	male	Other	YES	YES	NO	NO	YES	YES	NO	NO	NO	NO	53	173	84	28.0669	143	87	4.13	2.05	3.8	0.82	1.69	4.3	325	78	34	18	36	5	3.1	1	1	24	19	34	25	0.78	0.65	1.2	38	80.32	6.18	213.12	6.53	107.767	67.93
451	8.8177	0	male	Han	YES	NO	NO	NO	NO	NO	NO	NO	NO	NO	34	173	88	29.4037	153	88	4.95	1.71	4.5	0.68	1.88	4.8	288	70	33	23	34	5.2	3.3	1.2	1.2	29	21	29	20	0.75	0.6	1.25	36.54	85.38	6.23	296.703	8	146.245	65.93
452	8.8145	0	male	Kazak	NO	NO	NO	NO	NO	NO	YES	YES	YES	NO	66	158	58	23.2338	134	62	6.49	1.3	5.17	1.36	1.7	4.7	340.1	79.1	30	16	32	4.5	2.9	0.9	0.9	26	17	31	23	0.66	0.72	0.92	35.56	60.24	4.64	151.679	7.65	97.6494	65.16
453	8.8121	0	male	Uygur	NO	YES	YES	YES	NO	YES	YES	NO	YES	YES	59	165	75	27.5488	110	87	5.04	1.67	2.73	0.8	2.72	3.6	215	65	33	17	34	4.9	3.2	0.9	0.9	28	17	35	22	0.76	0.52	1.46	34.69	71.85	5.39	176.839	2.03	97.5069	63.69
454	8.811	0	female	Uygur	NO	NO	NO	YES	NO	NO	YES	YES	NO	NO	49	168	80	28.3449	150	95	2.95	2.85	3.52	1.08	3.52	4.9	565	89.5	35	22	40	4.9	3.2	1	0.9	28	18	34	23	1.05	0.64	1.64	34.69	71.85	6.11	191.054	8.4	100.772	63.69
455	8.8096	0	male	Uygur	YES	YES	NO	NO	YES	NO	YES	NO	NO	NO	63	168	75	26.5732	183	100	4.49	1.87	4.43	1.06	1.51	2.3	433	53	30	21	33	4.5	3.1	1.4	1.3	23	16	27	24	0.61	0.89	0.69	31.11	54.53	5.4	279.808	4.95	152.742	58.98
456	8.8069	0	female	Han	NO	NO	NO	YES	NO	YES	YES	NO	YES	NO	64	152	60	25.9702	141	60	4.84	1.73	3.98	1.55	1.46	7.47	285.63	73.87	30	20	30	4.6	3	0.9	0.9	30	18	31	21	0.66	0.56	1.18	34.78	62.34	4.86	157.8	6.29	102.315	64.04
457	8.8057	0	male	Han	YES	NO	YES	NO	NO	NO	YES	NO	NO	NO	59	160	67	26.1719	173	97	5.26	1.59	1.71	0.96	1.25	5	291	53	27	17	28	4.5	3.1	1	1	24	16	28	16	0.62	0.73	0.85	31.11	54.53	4.04	177.24	8.27	105.456	58.98
458	8.8027	0	male	Han	NO	NO	NO	NO	NO	YES	NO	YES	NO	NO	56	178	83	26.1972	153	78	4.82	1.73	4.97	0.9	1.74	4	309	54				5.3	3.5	1.2	1.2					0.61	0.88	0.69	33.96	84.47	6.79	306.362	8.11	153.542	62.41
459	8.801	0	female	Uygur	NO	NO	NO	NO	YES	NO	NO	NO	NO	NO	55	157	72	29.2106	146	80	3.29	2.53	3.39	0.66	2.22	6.98	319.09	62.31	30	20	30	4.2	2.9	0.8	0.8	26	19	33	23	0.54	0.88	0.61	30.95	46.37	3.29	112.265	7.2	65.8523	59.01
460	8.7989	0	female	Kazak	NO	NO	NO	YES	NO	YES	NO	NO	YES	NO	79	176	80	25.8271	135	70	4.49	1.85	2.44	0.8	1.92	4.4	342.4	88.7	34	18	42	5.1	3.2	1	0.9	32	16	35	26	0.6	0.84	0.71	37.25	82.85	6.38	205.163	11.44	105.499	66.92
461	8.7986	0	male	Han	NO	NO	NO	NO	YES	NO	YES	NO	NO	NO	54	175	60	19.5925	120	80	5.19	1.6	2.87	0.92	2.88	4.4	304	49				4.3	2.9	1	1					0.65	0.88	0.74	32.56	50.86	3.81	163.762	2.03	97.3265	61.23
462	8.7975	0	male	Kazak	NO	YES	NO	YES	NO	YES	NO	NO	YES	NO	70	164	83	30.8598	168	93	4.74	1.75	3.67	0.71	2.79	3.4	411.4	80.9	33	21	36	5	3.3	1.2	1.2	28	19	33	22	0.52	0.62	0.84	34	74.11	5.26	277.833	6.93	145.47	62.68
463	8.7969	0	female	Other	NO	NO	NO	NO	YES	NO	NO	NO	NO	NO	23	168	83	29.4079	152	81	5.49	1.51	3.77	1.07	2.31	3.3	317	61.2	33	21	39	4.8	3.2	0.9	0.9	27	19	31	25	0.95	0.63	1.51	33.33	66.56	5.06	170.38	9.5	88.0836	61.9
464	8.7935	0	male	Uygur	YES	YES	NO	YES	YES	NO	YES	NO	YES	NO	45	163	75	28.2284	168	107	4.07	2.03	3.47	1	1.6	4.8	290	51	39	19	42	5.9	4	1.4	1.4	29	20	35	29	0.89	0.74	1.2	33.33	98.09	6.67	457.649	9.6	257.265	61.29
465	8.7932	0	male	Uygur	YES	YES	NO	YES	NO	NO	NO	NO	NO	NO	28	172	60	20.2813	128	95	5.47	1.51	1.84	0.95	2.52	4.6	363.5	89.2	40	20	31	4.7	3.1	1	0.9	26	19	32	23	0.78	0.56	1.39	34.04	64.44	4.64	177.42	5.68	106.603	62.95
466	8.7821	0	female	Han	NO	NO	NO	NO	YES	NO	YES	NO	NO	NO	57	162	62	23.6245	108	63	5.17	1.58	3.28	1.07	3.44	5.6	266	69	38	21	31	5.4	4	0.8	0.8	30	20	31	19	0.49	0.65	0.75	25.93	71.31	4.85	179.357	6.13	110.109	50.46
467	8.7781	0	male	Han	NO	YES	NO	YES	YES	YES	NO	NO	YES	NO	49	160	63	24.6096	124	93	5.65	1.44	3.98	1.1	3.32	8.6	220.4	94.4	41	23	42	4.8	3.2	0.9	0.9	28	20	37	31	0.74			33.33	66.56	4.93	170.38	6.73	104.56	61.9
468	8.777	1	male	Han	NO	NO	NO	YES	NO	YES	NO	YES	YES	NO	61	174	83	27.4148	139	97	6.11	1.33	4.44	0.98	1.95	8.4	318	110	34	23	37	5.3	3.7	1.2	1.2	29	19	31	23	0.4	0.82	0.49	32	71	4.74	306.362	11	157.432	63.27
469	8.7747	1	male	Kazak	NO	NO	NO	YES	NO	YES	NO	NO	YES	NO	69	179	85	26.5295	148	85	5.67	1.43	5.45	1.13	2.29	5	235	63	38	24	40	5.9	4.3	1.2	1.2	30	20	35	26	0.48	0.91	0.53	28.57	83.66	6.69	367.464	7.4	183.595	66.39
470	8.7738	0	female	Han	NO	NO	NO	YES	NO	NO	YES	YES	NO	NO	79	170	78	26.9904	171	102	4.97	1.63	5.4	1.02	1.4	4.1	321.8	89.2	38	25	30	5	3.2	1.2	1.2	29	20	32	23	0.68	0.77	0.88	36	77.28	6.18	277.833	7.16	147.587	65.36
471	8.7732	1	male	Kazak	YES	NO	NO	YES	YES	YES	NO	NO	YES	NO	75	170	98	33.9109	129	60	5.06	1.6	3.91	0.99	2.44	6.8	283.7	62.9	37	20	40	5.2	3.5	1.3	1.2	28	19	35	24	0.89	1.01	0.88	34.69	71.85	5.17	314.962	11.47	149.335	64.73
472	8.7732	0	male	Han	NO	NO	NO	YES	YES	NO	YES	NO	NO	NO	51	163	69	25.9704	150	80	4.6	1.76	5.21	1.34	2.06	4.9	337.3	76.2	29	18	35	4.6	3.1	0.9	0.9	27	18	35	26	0.67	0.73	0.92	32.61	59.42	4.34	157.8	8.93	91.4997	61.04
473	8.7682	0	female	Han	NO	NO	YES	NO	NO	YES	YES	NO	NO	NO	81	165	79	29.0182	125	77	7.39	1.09	4.21	0.99	3.45	7.5	305	74	30	20	35	4.7	3.2	0.9	0.9	26	18	35	23	0.65	0.85	0.76	31.91	61.4	4.91	164.034	2.03	87.9634	59.98
474	8.7653	0	female	Uygur	NO	NO	YES	NO	NO	NO	YES	NO	NO	NO	68	180	100	30.8646	147	86	4.67	1.72	2.86	0.88	3.46	4.2	539.4	77.1				5.1	3.3	1	1					0.74	0.62	1.19	35.29	79.68	6.14	220.67	5.92	99.1733	64.36
475	8.763	0	male	Han	NO	NO	YES	NO	NO	NO	YES	NO	NO	NO	49	165	95	34.8946	128	84	5.04	1.59	3.34	0.87	1.81	6.8	354	55	36	21	36	4.8	3.2	0.9	0.9	30	20	27	24	0.66	0.94	0.7	33.33	66.56	5.46	170.38	7.76	82.3252	61.9
476	8.7613	0	male	Han	YES	YES	NO	NO	NO	YES	NO	NO	YES	NO	65	170	75	25.9523	116	65	3.54	2.26	4.53	1.16	3.45	3.2	243	54	35	23	36	4.5	3	0.9	0.9	28	18	35	25	0.81	0.55	1.47	33.33	57.45	4.02	151.679	10.94	83.2668	62.14
477	8.7582	0	female	Uygur	NO	NO	NO	NO	YES	YES	YES	YES	YES	NO	57	150	52	23.112	159	100	5.08	1.57	3.02	1.27	2.14	3.1	250.1	60.3	32	15	29	4.6	3	1.1	1	38	17	31	24	0.49	0.76	0.64	34.78	62.34	5.55	197.964	8.13	138.659	64.04
478	8.7578	0	male	Han	YES	YES	NO	NO	NO	YES	YES	NO	NO	NO	40	160	75	29.2975	118	59	6.18	1.29	3.07	1.05	3.51	6.4	290	61	28	19	41	5.5	3.9	0.8	0.9	27	18	36	26	0.54	0.67	0.81	29.09	81.51	6.28	201.548	7.71	113.032	55.29
479	8.7531	0	female	Han	NO	NO	NO	NO	NO	NO	NO	NO	NO	NO	46	155	67	27.8877	172	81	5.75	1.38	3.37	1.29	2.73	5	268.7	53.5	30	19	36	4.7	3.1	1	1	26	18	35	23	1.12	0.83	1.35	34.04	64.44	5.03	191.218	7.17	115.875	62.95
480	8.7525	0	female	Han	NO	NO	NO	NO	YES	NO	NO	NO	NO	NO	51	160	78	30.4696	172	89	6.1	1.3	3.49	0.89	1.9	6.7	307.2	67.7	31	17	30	4.2	2.7	1.1	1.1	30	18	31	20	0.45	0.61	0.74	37.5	47.68	3.53	181.978	8.46	101.206	68.11
481	8.7522	0	female	Han	NO	NO	NO	NO	YES	NO	NO	NO	NO	NO	36	160	66	25.7813	167	81	4.53	1.75	2.52	1.17	1.61	3.6	384	66				5	3.2	1	1					0.99	0.84	1.18	36	77.28	5.26	213.12	8.4	127.777	65.36
482	8.7521	0	male	Han	NO	NO	NO	NO	YES	NO	NO	NO	NO	NO	36	176	70	22.5983	158	88	5.32	1.49	7.1	0.95	1.1	3.7	284.1	80.9	33	21	40	5.4	3.6	0.9	0.9	26	19	32	22	0.72	0.78	0.92	33.33	86.88	6.52	210.815	9.57	116.043	61.48
483	8.7518	0	male	Han	NO	NO	NO	YES	NO	NO	NO	YES	YES	NO	56	155	61	25.3903	120	65	5.62	1.41	3.26	1.37	1.67	6.7	272	52	27	19	33	4.4	3	0.9	0.9	27	18	31	22	0.89	1.12	0.79	31.82	52.69	4.11	145.67	9.89	92.5828	60.09
484	8.7492	0	female	Han	NO	NO	NO	YES	NO	YES	YES	NO	NO	NO	48	180	91	28.0865	128	85	4.16	1.9	2.48	1.03	2.12	7.3	463	81				4.9	3.3	1	1					0.7	0.56	1.25	32.65	68.68	5.49	205.694	2.03	97.4901	60.88
485	8.7487	0	female	Han	NO	NO	NO	NO	YES	YES	YES	YES	NO	NO	50	168	69	24.4474	134	63	4.01	1.97	3.51	0.94	3	12.4	372.3	234.4	30	17	35	4.9	3.1	0.8	0.8	24	16	36	24	0.86	0.72	1.19	36.73	74.89	5.77	149.655	7.48	86.2863	66.39
486	8.7476	0	male	Uygur	NO	NO	NO	YES	NO	YES	NO	YES	YES	NO	62	178	102	32.1937	143	84	5.48	1.44	3.77	1	2.21	6.7	467.5	104.1	33	18	40	5	3.3	1.2	1.2	32	18	34	23	0.99	0.95	1.04	34	74.11	5.56	277.833	8.25	124.116	62.68
487	8.7464	0	female	Uygur	NO	NO	NO	YES	YES	YES	NO	NO	YES	NO	63	160	62	24.2189	125	80	5.59	1.41	3.01	0.72	2.81	5.4	353.5	89.5				4.8	3.2	0.9	0.9					0.55	0.69	0.8	33.33	66.56	4.79	170.38	7.65	105.388	61.9
488	8.7461	0	male	Uygur	YES	YES	NO	YES	YES	YES	YES	NO	YES	NO	67	155	56	23.3092	102	60	3.19	2.47	4.89	1.35	2.83	4.9	203	51.9	36	22	33	4.5	3	0.9	0.8	30	20	34	25	0.86	0.6	1.43	33.33	57.45	3.79	139.491	6.88	93.4551	62.14
489	8.7461	0	female	Other	NO	NO	NO	NO	YES	YES	NO	YES	YES	NO	64	175	60	19.592	120	82	5.71	1.38	1.28	0.9	2.71	3.4	251	78.4	29	17	32	4.4	2.9	0.8	0.8	28	18	34	23	0.56	0.68	0.82	34.09	55.48	3.94	122.449	8.4	72.7735	63.27
490	8.7398	0	male	Han	NO	NO	NO	YES	YES	NO	YES	NO	NO	NO	51	163	69	25.971	150	80	4.5	1.74	2.53	1.34	3.84	4.9	337.3	76.2	29	18	35	4.6	3.1	0.9	0.9	27	18	35	26	0.67	0.73	0.92	32.61	59.42	4.34	157.8	8.93	92.6113	61.04
491	8.7385	0	male	Kazak	YES	YES	NO	YES	NO	NO	YES	NO	YES	NO	51	175	94	30.6947	157	99	4.6	1.7	3.97	0.95	1.99	6	306	86				4.9	3.2	1	1					0.89	0.99	0.9	34.69	71.85	4.89	205.694	2.03	97.1265	63.69
492	8.7384	0	female	Han	NO	NO	YES	NO	NO	NO	YES	NO	NO	NO	68	175	67	21.8777	150	97	4.32	1.81	6.41	1.06	3.81	6.9	300	55	31	20	31	4.8	3.2	0.9	0.9	26	18	32	23	0.78	0.56	1.39	33.33	66.56	5.13	170.38	6	96.1405	61.9
493	8.7357	0	male	Han	YES	YES	NO	YES	NO	NO	NO	YES	YES	NO	55	166	79	28.6696	153	86	4.56	1.71	5.74	0.79	3.44	5.4	296.2	86.8	39	17	34	5	3.1	0.9	0.9	27	18	33	24	0.5	0.83	0.6	38	80.32	6.59	183.409	6.67	98.0326	67.93
494	8.735	1	male	Han	NO	NO	NO	NO	YES	YES	NO	NO	YES	NO	41	167	73	26.1754	135	57	5.23	1.49	4.42	1.23	3.1	7.8	397.3	152.9	40	16	35	5	3.4	1.3	1.3	24	18	36	22	0.66	0.81	0.81	34.04	64.44	4.96	312.935	10.43	175.974	64
495	8.7337	0	female	Han	NO	NO	NO	NO	YES	YES	NO	YES	NO	NO	47	172	86	29.0706	155	96	4.66	1.67	4.77	0.83	3.3	3.6	538.4	89.5	34	19	32	4.9	3.1	0.9	0.9	26	19	37	23	0.9	0.63	1.43	36.73	74.89	4.94	176.839	7.65	88.5477	66.39
496	8.7321	0	female	Han	NO	NO	NO	NO	YES	NO	NO	NO	NO	NO	41	157	80	32.4563	140	59	6.07	1.28	3.84	0.83	2.5	139.4	1187	3766	35	21	35	4.9	3.2	1	1	27	18	35	23	0.6	0.7	0.86	34.69	71.85	5.6	205.694	7.65	112.475	63.69
497	8.7303	1	male	Kazak	NO	NO	YES	YES	NO	YES	NO	YES	YES	NO	77	170	106	36.6784	128	57	5.54	1.4	2.95	0.86	2.41	7.6	381	84	31	19	40	5	3.5	1.3	1.3	34	21	33	24	0.6	1.07	0.56	31.91	61.4	5.34	312.935	9	141.657	64.36
498	8.7294	0	female	Han	NO	NO	NO	YES	NO	NO	YES	NO	YES	NO	64	152	60	25.97	141	60	4.64	1.67	3.05	1.55	1.15	7.47	285.63	73.87	30	20	30	4.6	3	0.9	0.9	30	18	31	21	0.66	0.56	1.18	34.78	62.34	4.86	157.8	6.29	103.523	64.04
499	8.7291	0	male	Uygur	NO	YES	YES	NO	YES	NO	YES	YES	NO	NO	54	160	40	15.6254	118	79	4.21	1.84	2.93	0.93	3.95	4.3	340	58	32	19	32	4.2	2.9	0.8	0.8	30	20	33	23	0.76	0.46	1.65	30.95	46.37	3.57	112.265	6.08	84.0873	59.01
500	8.7286	0	male	Han	YES	NO	NO	NO	NO	YES	NO	NO	NO	NO	34	173	88	29.403	153	88	4.75	1.63	3.14	0.68	3.22	4.8	288	70	33	23	34	5.4	3.5	1.4	1.4	29	21	29	20	0.75	0.6	1.25	36.54	85.38	6.23	396.06	6.93	197.793	65.93
501	8.7276	0	male	Han	YES	YES	NO	NO	YES	YES	YES	NO	NO	NO	55	180	114	35.1859	144	74	3.5	2.21	3.29	0.96	1.98	4.7	363	74	36	20	42	5.3	3.5	1	1	30	20	35	24	0.75	0.68	1.1	33.96	84.47	6.42	236.146	10	98.218	62.41
502	8.7267	0	male	Han	NO	NO	NO	NO	YES	NO	NO	NO	NO	NO	35	175	85	27.7557	112	65	4.2	1.84	6.3	0.92	1.7	10.5	437	123	35	18	37	4.9	3.3	0.9	0.9	30	20	35	23	0.65	0.88	0.74	32.65	68.68	4.81	176.839	7.65	88.3045	60.88
503	8.7265	0	male	Han	YES	YES	NO	NO	NO	YES	NO	YES	YES	NO	59	172	80	27.0418	174	102	4.11	1.88	3.86	0.94	2.68	0.5	401	72	39	18	37	5	3.2	1	0.9	28	19	32	25	0.81	0.62	1.31	36	77.28	5.49	198.049	8.53	103.135	65.36
504	8.7262	0	female	Uygur	NO	NO	YES	NO	NO	NO	YES	YES	YES	NO	76	155	55	22.8935	121	73	4.71	1.64	3.32	1.28	3.6	5	195.5	62.1	31	19	34	4	2.7	0.9	0.9	27	16	33	23	0.8	0.73	1.1	32.5	42.98	3.35	122.756	6.96	82.0236	61.4
505	8.7251	0	female	Han	NO	NO	YES	NO	NO	NO	NO	NO	NO	NO	58	170	75	25.9522	129	66	5.01	1.54	4.71	0.99	2.1	4.3	292.4	78.3	37	21	36	4.4	2.8	1	0.9	30	20	32	24	0.75	0.96	0.78	36.36	58.14	4.3	157.858	8.82	85.6014	66.3
506	8.7225	0	male	Han	NO	NO	YES	YES	YES	NO	NO	YES	YES	NO	63	152	60	25.9697	112	60	2.6	2.96	3.29	0.89	2.06	9.18	419.06	72.75	32	22	35	4.8	3.2	1.1	1.1	28	19	36	22	0.45	0.68	0.66	34.78	62.34	4.61	228.104	6.43	149.645	64.04
507	8.7222	1	male	Han	YES	YES	NO	YES	NO	NO	YES	YES	NO	NO	65	166	74	26.8546	102	62	4.9	1.57	4.81	0.9	2.91	6.3	280.8	85.7	35	20	32	5.5	4	1.2	1.2	29	20	36	24	0.99	0.86	1.15	28.85	71.38	5.57	326.131	11.42	182.737	67.47
508	8.7212	0	male	Han	NO	YES	NO	NO	YES	YES	NO	NO	NO	NO	39	180	87	26.8525	148	78	5.49	1.4	3.47	0.86	2.66	6.2	419.8	87.5	38	23	38	4.9	3.3	0.9	0.9	28	19	35	19	0.56	1.13	0.5	32.65	68.68	5.91	176.839	5.89	87.0012	60.88
509	8.72	0	male	Other	NO	NO	NO	NO	NO	NO	YES	NO	NO	NO	43	163	68	25.5947	101	70	5.86	1.31	4.35	0.98	1.15	6	240	61.5	31	18	31	4.5	3	0.9	0.9	27	18	33	23	0.86	0.98	0.88	33.33	57.45	4.14	151.679	8.19	88.6078	62.14
510	8.7197	1	male	Han	YES	NO	NO	YES	NO	YES	NO	NO	YES	NO	84	169	68	23.8093	164	77	4.24	1.81	2.69	0.65	1.61	5.9	365	82	31	18	32	5.1	3.5	1.2	1.2	28	16	32	23	0.44	0.65	0.68	33.33	66.56	5.13	287.193	6.87	166.2	63.69
511	8.718	0	male	Han	YES	YES	NO	NO	YES	NO	NO	NO	YES	NO	46	169	103	36.0632	145	87	5.32	1.44	4.04	0.86	2.63	5.4	366.2	77.1	36	20	39	4.8	3.2	1.3	1.2	31	21	36	24	0.58	0.92	0.63	33.33	66.56	4.13	275.962	7.25	125.643	61.9
512	8.7173	0	male	Han	YES	YES	YES	NO	YES	YES	YES	YES	YES	NO	61	152	54	23.3733	166	82	6.38	1.2	6.39	1.21	3.66	6.6	254	35	32	20	31	4.3	2.9	0.8	0.8	25	18	27	18	0.38	0.76	0.5	32.56	50.86	3.71	117.307	5.07	80.0456	61.23
513	8.7171	0	male	Uygur	YES	NO	NO	YES	NO	NO	NO	YES	NO	NO	50	175	72	23.5104	147	86	4.3	1.78	3.4	1.16	1.7	5.2	424	77	35	23	38	5.5	3.4	1.1	1	28	18	39	27	0.51	0.67	0.76	38.18	99.98	7.5	269.905	5.75	146.991	67.82
514	8.7153	0	female	Other	YES	YES	NO	NO	YES	NO	YES	YES	YES	NO	63	150	66	29.3337	143	82	5.06	1.51	4.32	0.99	2.48	6.7	404	68				4.8	3.2	0.9	0.9					0.63	0.98	0.64	33.33	66.56	4.99	170.38	10.13	106.03	61.9
515	8.7135	0	male	Kazak	NO	NO	NO	YES	NO	NO	YES	NO	YES	NO	67	187	86	24.5941	143	87	5.26	1.45	3.04	0.73	1.63	5.3	314	68	30	18	35	5.1	3.2	1	1	24	3	34	22	0.7	0.56	1.25	37.25	82.85	5.8	220.67	6.25	105.655	66.92
516	8.7117	1	male	Han	YES	NO	NO	NO	NO	YES	NO	NO	NO	NO	56	170	70	24.2215	121	79	4.88	1.56	2.41	0.91	4.31	6.5	287.3	94.7	35	21	34	5.3	3.6	1.2	1.2	30	20	34	21	0.52	0.8	0.65	34	74.11	4.82	306.362	7.5	174.159	65.81
517	8.711	0	male	Han	NO	YES	NO	NO	YES	NO	NO	YES	NO	NO	51	170	106	36.679	128	57	6.34	1.2	3.65	0.86	2.09	7.6	381	84	31	19	40	4.7	3.2	1	1	34	21	33	24	0.6	1.07	0.56	31.91	61.4	5.34	191.218	8	85.3307	59.98
518	8.7031	0	male	Uygur	YES	NO	NO	YES	NO	NO	YES	YES	YES	NO	52	170	90	31.1421	132	69	4.17	1.81	2.83	0.99	3.9	2.9	446.4	68.1	38	21	32	4.8	3.2	1	1	32	17	32	25	0.65	0.74	0.88	33.33	66.56	4.93	198.394	7.19	97.438	61.9
519	8.7017	0	female	Han	NO	NO	NO	NO	YES	NO	YES	NO	YES	NO	57	163	71	26.7235	141	70	6.03	1.25	3.37	1.34	4.77	5.6	369.9	58.8	32	21	33	4.9	3.4	0.9	0.9	24	15	32	20	0.73	0.86	0.85	30.61	65.37	4.38	176.839	7.19	101.039	57.95
520	8.7014	0	male	Han	YES	NO	NO	NO	YES	YES	NO	NO	NO	NO	68	160	79	30.8603	141	91	4.83	1.56	2.72	1.02	2.5	4.3	337	51	37	20	36	5.1	3.4	1	0.9	33	18	34	20	0.59	0.89	0.66	33.33	76.37	5.42	205.163	5.9	111.848	61.68
521	8.7005	0	female	Han	NO	NO	NO	NO	YES	NO	NO	NO	NO	NO	38	156	50	20.5461	127	66	6.49	1.16	4.24	1.12	2.47	3.78	269.41	56.49	32	20	32	4.3	2.8	0.8	0.8	27	18	31	22	0.83	1.05	0.79	34.88	53.52	4.55	117.307	12.77	82.3958	64.43
522	8.7004	0	male	Han	YES	YES	NO	NO	YES	YES	YES	YES	YES	NO	47	165	100	36.7318	141	90	5.66	1.33	2.16	1.5	1.34	4.9	289	57	35	22	41	5	3.5	0.9	0.9	32	20	36	25	0.62	0.71	0.87	30	67.37	5.46	183.409	12.93	85.9624	56.98
523	8.7003	0	male	Kazak	YES	NO	YES	YES	YES	NO	NO	NO	NO	NO	54	168	78	27.6364	172	92	4.48	1.68	3.4	1.18	2.91	5.6	190.2	71.3	34	17	40	5.3	3.7	1.4	1.4	29	21	5	25	0.56	0.88	0.64	31.37	72.94	5.25	384.267	6.73	208.06	58.91
524	8.6977	0	female	Han	NO	NO	NO	NO	NO	YES	YES	NO	NO	NO	51	172	71	23.9998	167	84	4.55	1.65	5.52	0.88	2.86	6.1	328.5	103.6	35	23	38	5.1	3.3	0.9	0.9	30	20	32	25	1.25	1.04	1.2	35.29	79.68	6.37	190.092	11.9	106.566	64.36
525	8.6972	0	male	Han	NO	NO	YES	NO	YES	NO	NO	NO	NO	NO	56	167	73	26.1761	160	94	4.44	1.69	3.22	1.03	2.1	5.5	487	87	34	21	33	4.9	3.2	0.8	0.8	29	21	35	24	0.72	0.56	1.29	34.69	71.85	5.17	149.655	6	83.1325	63.69
526	8.6947	0	male	Han	NO	NO	YES	YES	NO	YES	NO	NO	NO	NO	67	172	97	32.7883	130	80	5.67	1.32	3.21	1.03	2.37	8.3	397.3	89.5	38	21	40	5	3.2	1.1	1	31	21	37	25	0.62	0.79	0.78	36	77.28	5.87	228.627	7.29	106.94	65.36
527	8.6937	0	male	Han	NO	NO	NO	NO	YES	NO	NO	NO	NO	NO	54	176	86	27.7636	154	84	4.02	1.86	3.13	0.91	3.35	4.1	534.6	84.8	35	19	36	5	3.3	1.2	1.2	30	19	35	24	0.65	0.79	0.82	34	74.11	5.04	277.833	5.2	137.439	62.68
528	8.6934	1	male	Han	YES	YES	NO	YES	NO	YES	NO	YES	NO	NO	83	178	80	25.2498	138	81	5.62	1.33	3.41	1.12	2.4	5.24	429.32	82.49	34	20	33	5	3.5	1.2	1.2	28	19	34	23	0.56	0.98	0.57	31.91	61.4	4.85	277.833	7.59	143.739	62.68
529	8.6927	0	male	Han	NO	YES	NO	NO	YES	NO	YES	NO	NO	NO	57	183	90	26.8747	127	80	4.42	1.69	4.53	0.99	4.08	3.8	357.6	79.8	28	19	35	4.5	3	0.9	0.9	26	17	32	23	0.85	0.74	1.15	33.33	57.45	4.08	151.679	12.93	71.7022	62.14
530	8.6927	0	male	Han	YES	NO	NO	NO	YES	YES	YES	NO	YES	NO	47	160	67	26.1726	138	69	4.5	1.66	3.9	1.11	2.18	4.4	272	57	32	20	37	4.7	3.1	1	0.9	24	17	33	23	0.93	1.16	0.8	34.04	64.44	5.03	177.42	7.43	105.563	62.95
531	8.6903	0	male	Han	YES	YES	NO	NO	YES	YES	YES	NO	NO	NO	57	175	60	19.5924	117	105	5.4	1.38	3.98	1.02	2.75	3.4	282	54				4.4	2.9	0.9	0.9					0.68	0.74	0.92	34.09	55.48	6.55	145.67	6.33	86.5742	63.27
532	8.6889	0	male	Han	YES	YES	NO	YES	NO	YES	YES	NO	YES	NO	85	168	88	31.18	179	104	4.51	1.65	3.21	1	1.24	7.2	366	65	35	23	41	5.3	3.5	1.2	1.2	30	21	34	23	0.75	0.6	1.25	33.96	84.47	6.42	306.362	9	153.311	62.41
533	8.6885	0	male	Han	YES	YES	NO	NO	NO	YES	NO	NO	NO	NO	53	164	68	25.2829	146	63	5.13	1.45	3.42	1.71	2.66	3.4	163	53	31	20	33	4.3	2.8	0.8	0.8	28	18	34	22	0.84	0.96	0.88	34.88	53.52	3.96	117.307	11.2	68.285	64.43
534	8.6868	0	female	Han	NO	NO	NO	YES	NO	NO	YES	YES	NO	NO	79	177	105	33.5159	172	82	4.73	1.57	2.34	1.28	1.81	5.3	509.1	118.3				5.2	3.4	1	1					0.63	0.77	0.82	34.62	82.07	5.91	228.346	5.92	100.557	63.37
535	8.6856	0	male	Han	NO	NO	NO	NO	YES	NO	YES	NO	NO	NO	71	168	95	33.6603	148	82	5.84	1.27	5.19	0.73	3.4	4.6	383.7	67.7	31	22	40	5.3	3.4	1.1	1	26	20	32	22	0.68	0.84	0.81	35.85	87.9	7.47	253.001	7.47	121.175	64.95
536	8.6812	0	male	Han	NO	NO	YES	NO	NO	NO	YES	NO	NO	NO	87	174	72	23.7816	96	70	7.94	0.93	3.51	1.12	1.78	6.7	412.33	88.93	33	22	33	4.7	3.3	0.9	0.9	31	20	34	23	0.56	0.78	0.72	29.79	58.23	5.12	164.034	5.89	89.6312	56.89
537	8.6808	0	male	Han	YES	YES	YES	YES	NO	YES	NO	YES	YES	NO	54	176	68	21.9526	139	67	7.61	0.97	4.4	1.16	2.57	3.7	296	65	36	21	42	4.7	3.1	1	0.9	29	19	36	25	0.47	0.81	0.58	340.4	64.44	5.03	177.42	6.27	99.0564	62.95
538	8.6787	0	male	Other	NO	NO	NO	NO	YES	YES	NO	NO	NO	NO	53	165	52	19.1003	100	60	10.09	0.73	3.53	1.27	3.26	4.83	202.37	71.64	32	15	34	4.7	3.1	0.9	0.9	26	16	28	23	0.65	0.95	0.68	34.04	64.44	4.96	164.034	8.67	107.974	62.95
539	8.6772	0	male	Han	NO	NO	YES	NO	YES	NO	NO	NO	NO	YES	50	153	53	22.6414	141	60	4.54	1.62	5.55	0.97	3.67	6.2	260.8	69.6	27	18	33	4.8	3.2	0.9	0.9	25	16	30	24	0.75	0.97	0.77	33.33	66.56	4.79	170.38	10	116.795	61.9
540	8.6754	0	female	Han	NO	NO	YES	YES	NO	NO	YES	NO	YES	NO	77	182	108	32.605	159	105	4.37	1.68	3.12	0.87	1.67	4.6	394.9	81.8	40	22	37	5.2	3.5	0.9	0.9	29	19	36	24	0.73	0.61	1.2	32.69	78.64	5.74	196.888	5.62	84.1508	60.72
541	8.6744	0	female	Uygur	NO	NO	YES	NO	NO	NO	NO	NO	NO	NO	57	172	79	26.7044	140	95	3.8	1.93	3.81	1	3.04	8.8	354	65				4.8	3.2	0.9	0.9					0.68	0.52	1.31	33.33	66.56	5.13	170.38	8.4	89.3212	61.9
542	8.6722	0	female	Han	NO	NO	NO	NO	YES	NO	NO	YES	NO	NO	33	174	88	29.0664	139	96	5.19	1.41	4.57	0.82	3.05	6.4	463.4	62.2	35	22	39	5.1	3.6	0.9	1	30	20	38	22	0.57	0.78	0.73	29.41	69.38	4.58	205.163	6.71	100.822	56.04
543	8.6719	0	male	Han	NO	NO	NO	NO	NO	NO	NO	NO	NO	NO	32	178	105	33.1407	162	92	5.34	1.37	4.93	0.84	1.31	6.7	314.9	83.5	35	22	40	5.2	3.4	1.1	1	28	18	33	26	0.94	0.67	1.4	34.62	82.07	6.48	244.745	6.96	107.491	63.37
544	8.6718	0	male	Han	NO	NO	NO	NO	YES	NO	YES	NO	NO	NO	69	180	90	27.7785	169	78	3.5	2.09	3.76	0.8	2.04	8.5	410	96				5	3.2	1.1	1					0.79	0.64	1.23	36	77.28	5.72	228.627	11.44	109.021	65.36
545	8.6715	0	male	Kazak	NO	NO	NO	YES	NO	NO	YES	NO	NO	NO	51	169	77	26.9602	158	87	3.89	1.88	3.85	1.22	2.31	6.8	368	63	31	18	36	5	3.4	1.2	1.1	32	22	39	23	0.76	0.89	0.86	33.33	66.56	4.93	260.978	10	141.797	61.9
546	8.6697	0	male	Han	YES	YES	NO	NO	YES	YES	NO	NO	NO	NO	52	155	70	29.1372	143	90	5	1.46	3.55	1.09	1.69	9.4	310.4	83.9	29	20	41	4.5	3.1	0.9	0.8	31	21	35	34	0.56			31.11	54.53	3.54	139.491	8.4	82.6076	58.98
547	8.6683	0	male	Han	NO	NO	NO	NO	NO	NO	NO	NO	NO	YES	66	168	75	26.5732	164	64	5.17	1.41	4.45	0.93	1.68	5.9	375	61	34	16	38	4.3	2.7	1	1	28	17	33	25	0.7	0.97	0.72	37.21	56.05	3.76	163.762	2.03	89.3944	67.47
548	8.6674	0	male	Han	YES	NO	NO	NO	NO	NO	NO	YES	YES	NO	57	172	95	32.1126	154	86	4.21	1.73	3.97	1.09	3.58	5.6	290	60	41	22	45	5.1	3.3	1	0.9	24	18	36	26	0.56	0.68	0.82	35.29	79.68	5.58	205.163	7.47	97.1278	64.36
549	8.6654	0	male	Han	NO	NO	NO	YES	NO	YES	NO	NO	YES	NO	75	167	80	28.6852	120	85	4.13	1.76	3.82	0.78	5.37	5.1	255.3	75	32	21	39	5	3.3	1	1	30	21	33	20	0.68	0.6	1.13	34	74.11	5.56	213.12	7.16	112.774	62.68
550	8.6644	0	female	Uygur	NO	NO	NO	NO	NO	NO	YES	NO	NO	NO	64	163	50	18.8199	165	85	6.26	1.16	4.38	1.08	2.07	3.9	352	63	30	18	30	4.6	3	0.9	0.9	24	15	20	23	0.63	0.94	0.67	34.78	62.34	4.49	157.8	9.57	106.521	64.04
551	8.6634	0	male	Uygur	NO	NO	NO	YES	NO	YES	NO	YES	YES	NO	50	170	80	27.6819	137	84	3.72	1.95	3.17	0.87	1.45	5.7	303	92	38	20	35	5	3.4	0.9	0.9	25	17	34	24	0.51	1.12	0.46	32	70.8	8.140000000000001	183.409	10	96.1214	59.88
552	8.6621	0	male	Han	NO	NO	NO	NO	NO	NO	YES	NO	NO	NO	45	170	80	27.6824	153	83	5.66	1.28	3.85	0.87	4.67	4.5	320	71	39	20	33	5.2	3.3	0.9	0.9	26	16	32	23	0.65	0.89	0.73	36.54	85.38	7.43	196.888	8.67	103.185	65.93
553	8.6597	0	female	Han	NO	NO	NO	NO	NO	NO	NO	NO	NO	NO	51	170	70	24.2215	157	74	4.95	1.46	5.58	1.03	2.76	3.9	162	41				5.2	3.7	0.9	0.9					0.38	0.82	0.46	28.85	71.38	5.71	196.888	10	110.605	55.12
554	8.6587	1	male	Han	NO	NO	YES	YES	NO	YES	NO	YES	NO	NO	70	172	76	25.6899	132	67	5.27	1.37	3.33	1.32	2.24	10.7	386	108	38	16	33	5.6	3.7	1.2	1.2	28	18	30	17	1.3		2.59	35.85	87.9	6.15	336.239	11.13	182.115	53.62
555	8.6581	0	male	Han	YES	YES	NO	NO	YES	YES	NO	NO	NO	NO	42	163	64	24.0883	151	105	4.4	1.64	2.57	0.87	2.9	4.9	332.6	70.2	30	18	30	4.6	3	1	1	26	16	32	22	0.97	0.75	1.29	34.78	62.34	4.18	184.166	8.82	110.903	64.04
556	8.6548	0	male	Han	YES	YES	NO	YES	NO	NO	NO	NO	YES	NO	65	178	83	26.1968	111	68	4.61	1.56	2.15	1.06	2.05	5.3	326	56	38	23	33	5	3.3	1	1	30	19	36	22	0.96	0.8	1.23	34	74.11	4.89	213.12	6.76	106.811	62.68
557	8.651	0	male	Uygur	NO	NO	NO	NO	NO	NO	NO	NO	NO	NO	46	175	80	26.1227	145	90	4.29	1.67	6.89	1.24	2.57	5.9	352.9	82	33	22	40	5.1	3.3	0.9	0.9	24	17	31	21	1.1	0.91	1.21	35.29	79.68	7.81	190.092	7.65	98.0565	64.36
558	8.6459	0	male	Han	NO	NO	NO	YES	NO	NO	NO	YES	YES	NO	59	170	85	29.4122	176	100	4.95	1.44	5.43	1.64	2.12	5.5	342	76	38	24	39	4.8	3.2	1	0.9	30	20	35	25	0.61	0.8	0.76	33.33	66.56	4.93	184.178	8.4	93.3917	61.9
559	8.6455	0	male	Han	NO	NO	NO	NO	NO	YES	YES	NO	NO	NO	43	175	60	19.5922	185	106	3.51	2.03	3.02	1.11	2.58	4.2	366.7	80.9	39	22	38	4.9	3.3	0.9	0.8	29	20	32	20	0.67	0.9	0.74	32.65	68.68	5.56	163.041	7.88	96.8982	60.88
560	8.6439	0	male	Han	NO	NO	NO	NO	YES	NO	YES	NO	NO	NO	49	175	67	21.8783	112	67	5.01	1.42	4.64	0.92	1.48	4.5	324	97.1	36	22	36	5	3.3	1.1	1.1	31	21	35	23	0.45	0.66	0.68	35.42	69.6	4.94	244.578	5.87	139.591	64.73
561	8.6428	0	male	Han	NO	NO	NO	NO	NO	YES	YES	NO	NO	NO	82	155	66	27.4718	112	63	5.04	1.41	2.2	1.01	4.6	3.54	309.55	61.01	24	14	37	4.6	2.8	0.9	0.9	26	16	32	22	0.78	0.56	1.39	39.13	67.79		157.8	6.24	96.3725	69.64
562	8.6397	1	male	Kazak	NO	NO	NO	YES	NO	YES	YES	YES	YES	NO	80	175	85	27.7561	112	65	4.6	1.54	2.98	0.92	1.77	10.5	437	123	35	18	37	5.2	3.6	1.2	1.2	30	20	35	23	0.65	0.88	0.74	32.65	68.68	4.81	296.703	8.65	150.07	63.37
563	8.6376	0	male	Han	YES	YES	YES	NO	YES	YES	NO	NO	NO	NO	50	158	64	25.6373	168	72	5.16	1.37	4.17	0.98	2.14	4.8	332.5	59.9	27	21	33	4.2	2.6	0.8	0.8	29	19	28	20	0.71	0.62	1.15	38.1	53.97	3.83	112.265	5.68	68.87	68.68
564	8.6373	0	female	Han	NO	NO	NO	NO	NO	YES	YES	YES	NO	NO	39	158	86	34.4504	156	79	4.68	1.51	3.26	0.93	4.15	4.1	218	51	26	17	35	4.9	3.3	0.8	0.8	30	19	30	21	0.78	1.05	0.74	32.65	68.68	6.73	149.655	10.4	78.2837	60.88
565	8.6371	0	female	Uygur	NO	NO	NO	NO	YES	NO	NO	YES	YES	NO	51	156	62	25.4773	144	74	7.21	0.98	3.34	1.23	1.13	3.28	249.48	52.89	32	20	32	5	3.3	0.9	0.9	23	16	29	20	0.53	0.85	0.62	34	74.11	4.52	183.409	7.07	115.185	62.68
566	8.637	0	female	Han	NO	NO	NO	NO	YES	NO	YES	NO	NO	NO	57	176	87	28.0865	152	68	4.71	1.5	3.41	1.27	2.24	5.4	414.2	80.4				5.3	3.7	1	1					0.59	0.68	0.87	30.19	77.21	5.25	236.146	7.43	116.082	57.05
567	8.6328	0	male	Uygur	YES	YES	NO	NO	YES	YES	NO	YES	NO	NO	56	170	70	24.2221	150	75	4.92	1.43	4.5	0.63	2.8	7.35	282.71	93.66	51	35	33	5.4	3.6	1	1	30	20	35	23	0.65	0.77	0.84	33.33	86.88	6.52	244.07	7.22	137.111	61.48
568	8.6321	0	male	Han	NO	YES	NO	NO	YES	NO	NO	NO	NO	NO	45	175	103	33.6327	163	88	3.78	1.86	4.29	0.95	2.95	6	406.9	116.4	35	18	33	4.9	3.2	0.9	0.9	28	18	35	25	0.72	0.88	0.82	34.69	71.85	5.39	176.839	10.29	79.1933	63.69
569	8.6306	0	male	Han	NO	YES	YES	NO	NO	YES	YES	NO	NO	NO	55	163	69	25.9705	147	87	4.68	1.5	3.02	0.93	2.02	4.7	258.4	81.3				4.7	3.1	0.9	0.9					0.65	0.86	0.76	34.04	64.44	4.58	164.034	10	95.1143	62.95
570	8.6288	1	male	Han	YES	NO	NO	NO	YES	YES	NO	YES	NO	NO	70	182	90	27.1707	179	90	4.61	1.52	2.65	1	3.26	4.9	408	64	39	22	40	5.6	3.8	1.2	1.2	31	23	37	23	0.52	0.77	0.68	33.96	84.47	5.49	336.239	7.93	161.475	64.04
571	8.6244	0	male	Kazak	NO	NO	NO	YES	NO	YES	YES	YES	NO	NO	51	162	57	21.7197	174	90	4.56	1.53	3.87	1.12	1.38	4.4	191	51	31	20	30	4.5	2.9	0.9	0.9	24	18	31	23	0.85	0.6	1.42	35.56	60.24	4.7	151.679	6.8	96.9256	65.16
572	8.6234	0	male	Han	NO	NO	NO	NO	YES	NO	NO	NO	NO	NO	21	163	65	24.4649	168	80	7.26	0.96	3.06	1.11	2.77	4.3	337.9	54				4.8	3.2	0.9	0.9					0.71	0.91	0.78	33.33	66.56	5.06	170.38	7.65	101.817	61.9
573	8.6229	0	male	Uygur	YES	YES	NO	YES	YES	NO	NO	YES	NO	NO	53	174	74	24.4424	125	66	5.4	1.29	3.54	1.03	2.44	4.7	217	42	32	19	32	4.5	2.8	0.9	0.9	27	19	33	23	0.89	0.73	1.22	37.78	62.9	4.47	151.679	7.74	81.7367	68.04
574	8.6157	0	male	Uygur	YES	YES	NO	NO	NO	YES	NO	YES	NO	NO	55	173	90	30.0712	160	90	5.32	1.3	3.54	1.28	1.79	3.91	343.61	60.26	39	23	41	5.3	3.6	0.9	0.9	36	25	39	25	0.65	0.74	0.88	32.08	80.91	6.31	203.795	6.33	99.1995	59.78
575	8.612	0	female	Kazak	NO	NO	NO	YES	YES	NO	YES	NO	YES	NO	58	163	63	23.712	161	88	4.28	1.61	5.03	1.05	2.79	5.86	227.76	48.39	31	20	32	4.2	2.8	0.9	0.9	27	18	30	22	0.44	0.73	0.6	33.33	49.03	3.48	133.988	5.87	81.3136	62.4
576	8.612	0	male	Other	YES	NO	NO	NO	NO	YES	NO	NO	YES	NO	67	156	55	22.6007	142	84	5.22	1.32	5.39	1.24	1.56	2.1	190	52				4.5	2.8	0.8	0.8					0.82	0.67	1.22	37.78	62.09	无	127.69	2.03	84.9739	68.04
577	8.6116	0	male	Uygur	YES	YES	YES	YES	NO	YES	NO	NO	YES	NO	65	165	64	23.5081	122	80	4.1	1.68	3.35	0.81	1.92	4.6	395	68				5	3.3	1	1					0.65	0.82	0.79	34	74.11	5.34	213.12	7.47	127.403	62.68
578	8.6104	0	male	Han	NO	NO	NO	YES	NO	NO	YES	YES	YES	NO	78	183	106	31.653	157	93	4.41	1.56	3.61	0.79	3.45	4.4	363	62	35	22	39	5.2	3.4	1.2	1.2	30	20	38	27	1.01	0.82	1.23	34.62	82.07	6.16	296.703	9.62	127.878	63.37
579	8.6087	0	male	Han	YES	YES	NO	NO	NO	YES	YES	NO	NO	NO	55	172	85	28.7326	140	81	4.04	1.7	5.05	0.86	2.08	6.2	296.3	85.4	32	21	36	4.8	3.2	0.9	0.9	29	17	34	23	0.59	0.67	0.88	33.33	66.56	5.19	170.38	10	85.8641	61.9
580	8.6081	0	male	Han	NO	NO	NO	NO	NO	NO	NO	NO	NO	NO	73	160	66	25.7813	115	67	5.2	1.32	3.86	0.92	3.09	4.5	256.5	69.4	27	17	38	4.7	3	0.9	0.9	22	18	34	24	0.85	1.04	0.82	36.17	67.36	5.32	164.034	8.1	98.3477	65.81
581	8.6061	0	male	Han	YES	YES	NO	NO	NO	YES	NO	NO	NO	NO	40	160	75	29.2973	118	59	5.48	1.25	3.61	1.05	1.85	6.4	290	61	28	19	41	5.5	3.9	0.8	0.9	27	18	36	26	0.54	0.67	0.81	29.09	81.51	6.28	201.548	7.71	114.477	55.29
582	8.6025	0	female	Other	NO	NO	NO	NO	NO	NO	NO	NO	NO	NO	69	160	76	29.688	124	69	4.32	1.58	3.91	0.59	1.74	7.1	326.8	56.6	26	20	38	4.8	3.3	0.9	0.9	27	16	32	23	0.83	1	0.83	31.25	63.39	5.07	170.38	7.22	96.0917	58.96
583	8.5995	0	female	Uygur	NO	NO	NO	NO	NO	NO	YES	NO	NO	NO	63	165	63	23.1407	171	62	6.36	1.07	2.81	1.4	3.12	4.77	346.78	69.85	37	20	30	4.8	3.1	1	1	26	17	32	23	0.72	1.04	0.698	35.42	69.6	3.76	198.394	10	119.514	64.73
584	8.5993	0	male	Han	NO	NO	NO	NO	NO	NO	NO	NO	NO	NO	47	170	84	29.0658	132	71	4.93	1.38	2.7	0.77	1.51	3.6	330.1	90.1	32	20	35	4.5	3	1	1	28	19	35	23	0.84	0.89	0.94	34.88	53.52	3.64	177.24	9.88	91.6395	64.43
585	8.5988	0	female	Other	NO	NO	NO	NO	YES	YES	NO	NO	NO	NO	60	168	56	19.8422	111	47	5.62	1.21	4.28	1.32	2.82	5	267	69	28	17	28	4.4	2.9	0.9	0.9	23	18	34	22	0.77	0.59	1.31	34.09	55.48	4.6	145.67	8.13	91.6912	63.27
586	8.5988	0	female	Han	NO	NO	NO	YES	YES	YES	NO	YES	NO	NO	59	170	60	20.7619	136	78	4.69	1.45	2.99	1.9	2.29	4.7	214	51	29	16	35	5	3.3	0.9	0.9	25	17	32	22	0.74	0.85	0.87	34	74.11	5.93	183.409	6.43	111.016	62.68
587	8.5983	0	male	Han	NO	NO	NO	NO	NO	NO	NO	NO	NO	NO	42	178	96	30.3	140	93	4.17	1.63	3.82	0.82	2.73	4.3	485.7	81.2	35	22	33	4.8	3.3	0.8	1	26	17	32	26	0.96	0.85	1.13	31.25	63.39	4.5	170.38	9.14	78.8177	58.96
588	8.5971	0	male	Han	NO	NO	NO	YES	NO	YES	NO	NO	YES	YES	84	175	90	29.3886	149	90	4.65	1.46	3.87	0.97	2.03	8.5	312.2	68.1	33	23	43	5.1	3.4	1	1	33	17	36	23	0.35	0.65	0.54	33.33	76.37	5.88	220.67	7	106.779	61.68
589	8.5964	0	female	Han	NO	NO	NO	NO	YES	YES	NO	NO	NO	NO	53	156	55	22.6007	150	105	5.3	1.28	3.5	0.89	3.07	5.56	509.22	51.08	28	20	31	4.6	3.1	0.9	0.9	29	20	36	23	0.71	0.56	1.27	32.61	59.42	3.57	157.8	7.65	105.011	61.04
590	8.5952	0	male	Uygur	YES	NO	NO	NO	NO	NO	YES	NO	NO	NO	64	155	51	21.2282	135	72	3.85	1.76	3.93	1.01	2.17	5.1	206	44	33	23	44	4.6	3	0.9	0.9	28	20	29	23	0.86	0.6	1.43	34.78	62.34	4.8	157.8	13.23	110.342	64.06
591	8.5941	0	female	Kazak	NO	NO	NO	NO	NO	NO	YES	YES	NO	NO	69	172	77	26.0286	155	77	7.78	0.87	3.73	1.02	2.02	4.19	340.46	94.21	40	22	35	4.7	3.1	0.9	0.9	32	21	39	23	0.76	0.69	1.1	34.04	64.44	4	164.034	12.67	88.2473	62.95
592	8.5933	1	male	Han	NO	NO	NO	YES	NO	YES	NO	NO	YES	NO	75	166	74	26.8551	184	94	5.83	1.16	3.01	0.99	3.86	4	362	82	37	21	42	4.9	3.3	1.3	1.3	30	19	36	23	0.64	0.82	0.78	34.78	62.34	4.86	302.795	8.53	169.662	64.04
593	8.5923	0	male	Han	YES	YES	NO	NO	YES	NO	NO	NO	NO	NO	47	170	84	29.0664	149	79	4.07	1.66	5.01	0.82	2.95	4.1	336	57	31	20	36	4.8	3.2	0.8	0.8	27	19	34	21	0.62	0.65	0.95	33.33	66.56	4.99	144.014	8.86	73.5028	61.9
594	8.5881	0	male	Han	YES	YES	NO	NO	YES	YES	YES	NO	NO	NO	48	175	88	28.7349	122	56	4.84	1.39	4.04	0.95	2.62	6.66	354.47	107.82	35	21	37	4.8	3.2	1	0.9	29	19	35	25	0.89	1.02	0.87	33.33	66.56	4.59	184.178	11.87	90.239	61.9
595	8.5871	0	male	Uygur	NO	NO	NO	YES	NO	YES	YES	NO	YES	YES	59	160	91	35.547	148	78	5.42	1.24	3.9	0.98	4.07	8.1	380	109	33	20	35	4.8	3.2	1	1	26	16	33	25	0.64	1.2	0.53	33.33	66.56	4.66	198.394	8.53	99.8006	61.9
596	8.5858	0	female	Han	NO	NO	NO	NO	YES	NO	NO	NO	NO	NO	41	157	80	32.4561	140	59	5.37	1.25	3.17	0.83	2.14	139.4	1187	3766	35	21	35	5.1	3.4	1.2	1.2	27	18	35	23	0.6	0.7	0.86	34.69	71.85	5.6	287.193	6.71	159.127	63.69
597	8.5848	0	male	Other	NO	NO	NO	NO	YES	YES	NO	YES	NO	YES	68	156	67	27.5316	120	84	4.79	1.4	3.84	1.16	2.81	5.9	336.8	85.5				4.6	3.1	0.9	0.9					0.85	0.7	1.21	32.61	59.42	4.46	157.8	10	95.2728	61.04
598	8.5847	0	male	Uygur	NO	NO	NO	YES	YES	NO	YES	YES	YES	NO	67	176	69	22.276	122	76	4.47	1.5	3.06	1.15	3.58	9.9	397.4	94.8	34	26	42	5	3.4	1.5	1.4	27	18	32	21	0.68		1.22	33.33	66.56	4.86	369.161	8.5	207.021	61.9
599	8.5844	0	male	Kazak	YES	YES	NO	NO	YES	NO	NO	NO	NO	NO	34	160	86	33.5945	145	126	4.56	1.47	3.78	0.88	2.24	5.5	307	49				4.6	3	0.9	0.9					0.71	0.98	0.72	34.78	62.34	5.36	157.8	7.19	82.0211	64.04
600	8.5825	0	female	Han	NO	NO	NO	NO	YES	NO	NO	NO	NO	NO	36	175	90	29.3887	122	72	4.46	1.5	2.6	0.98	5.35	5.8	433.3	72	30	20	38	4.4	2.9	1.1	1	28	20	38	26	0.56	0.83	0.67	34.09	55.48	3.38	183.419	7.47	88.7538	63.27
601	8.5824	0	male	Han	YES	YES	YES	NO	NO	NO	YES	NO	NO	NO	61	178	80	25.2501	138	81	5.92	1.13	3.59	1.12	3.41	5.24	429.32	82.49	34	20	33	4.7	3.2	0.9	0.9	28	19	34	23	0.56	0.98	0.57	31.91	61.4	4.85	164.034	6.59	83.8234	59.98
602	8.5789	0	male	Han	YES	YES	NO	NO	NO	NO	YES	YES	NO	NO	49	175	110	35.9191	195	99	6.41	1.04	5.84	0.95	2.01	8.4	317.1	65.9				5.4	3.7	1	1					1.4	0.54	2.59	31.48	83.18	4.57	244.07	8.4	105.085	58.86
603	8.5783	0	female	Kazak	NO	NO	NO	NO	NO	YES	NO	YES	NO	NO	72	167	96	34.4226	155	104	5.33	1.25	5.17	0.93	3.78	4.4	256.7	6.6	36	21	33	4.8	3.2	1	1	31	19	34	24	0.65	0.85	0.76	33.33	66.56	5.13	198.394	7.19	94.7167	61.9
604	8.5779	0	male	Kazak	YES	YES	NO	YES	YES	YES	NO	YES	NO	NO	59	171	80	27.3591	135	100	4.97	1.34	4.99	0.7	1.15	7.6	376.2	128	35	21	39	5.1	3.4	1	0.9	30	20	35	24	0.72	0.89	0.81	33.33	76.37	6.11	205.163	9.6	107.18	61.68
605	8.5777	0	male	Han	YES	YES	YES	YES	YES	YES	YES	YES	YES	NO	58	175	85	27.7554	165	88	4.86	1.37	3.22	1.14	4.45	2.9	233.9	65.9	32	23	40	4.7	3.1	0.9	0.9	29	19	32	23	0.67	0.99	0.68	34.04	64.44	5.03	164.034	7.19	81.9106	62.95
606	8.5762	0	male	Han	NO	NO	NO	NO	YES	NO	YES	NO	NO	NO	63	172	75	25.3524	164	97	7.47	0.89	3.03	1.35	2.79	6.05	298.24	66.02	30	18	35	4.8	3.1	0.9	0.9	26	17	35	21	0.74	0.87	0.85	35.42	69.6	5.71	170.38	10.57	91.7848	64.73
607	8.5752	0	male	Uygur	YES	YES	YES	YES	NO	YES	NO	NO	NO	NO	57	164	58	21.5649	119	64	5.07	1.31	3.5	1.16	3.46	4.9	245	53	28	19	30	4.5	3	0.9	0.9	26	17	32	20	0.85	0.6	1.42	33.33	57.45	4.08	151.679	6.33	95.4015	62.14
608	8.5742	0	male	Uygur	NO	NO	NO	YES	NO	YES	NO	YES	YES	NO	64	160	57	22.2665	148	74	5.82	1.14	3.42	1.22	2.4	3.8	291	50	32	18	34	4.4	2.9	1	1	24	18	33	21	0.56	0.68	0.82	34.09	55.48	3.88	170.438	7.22	109.769	63.27
609	8.5713	0	female	Han	NO	NO	NO	NO	NO	NO	YES	NO	NO	NO	73	160	55	21.4846	136	79	4.44	1.49	3.7	1.11	3.18	5	307	67	34	23	35	4.6	3	0.8	0.8	29	20	33	22				34.78	62.34	4.8	133.032	6.33	87.1139	64.04
610	8.5712	0	female	Han	NO	NO	NO	NO	YES	YES	NO	YES	NO	NO	52	165	69	25.3453	148	92	4.5	1.47	3.41	1.37	1.75	4.2	238.8	68.5	30	19	33	4.4	2.8	0.9	0.9	28	19	34	25	0.56	0.66	0.85	36.36	58.14	5.52	145.67	5.89	83.8725	66.3
611	8.5677	0	male	Uygur	YES	YES	NO	NO	NO	NO	NO	NO	YES	NO	59	170	68	23.53	125	65	5.15	1.28	3.47	0.84	2.7	7.8	477	92	32	20	32	4.7	3.1	0.9	0.8	30	20	31	22	0.57	1.02	0.58	34.04	64.44	4.9	151.054	6.71	86.0951	62.95
612	8.5671	0	female	Han	NO	NO	NO	YES	NO	NO	YES	YES	YES	NO	71	162	69	26.2918	160	110	2.7	2.44	5.55	0.75	2.79	5.6	338.4	50	35	19	34	5.1	3.4	1.5	1.4	29	18	35	24	0.62	0.79	0.78	34.69	71.85	5.68	380.923	8.86	224.363	63.69
613	8.5668	0	female	Han	NO	NO	NO	YES	NO	YES	NO	YES	NO	NO	84	175	80	26.1229	152	77	4.42	1.49	4.54	0.97	1.53	6.1	282	60	36	22	34	5.2	3.4	0.9	0.9	31	22	35	23	0.53	0.71	0.75	34.62	82.07	6.48	196.888	7.07	101.562	63.37
614	8.566	0	female	Han	NO	NO	NO	YES	NO	NO	NO	NO	YES	NO	77	178	120	37.874	161	93	4.57	1.44	6.46	0.81	1.25	4.1	360	57	39	24	38	5.8	4	1.3	1.2	33	22	36	20	0.85	0.66	1.29	31.03	96.56	7.15	378.142	6	153.162	57.97
615	8.5638	0	male	Han	NO	NO	NO	YES	NO	YES	YES	NO	NO	NO	65	170	85	29.4123	174	84	4.69	1.4	4.01	0.82	3.25	4.9	322	55	35	22	38	5	3.2	0.9	0.9	29	19	36	23	0.88	0.97	0.91	36	77.28	5.1	183.409	8.38	93.002	65.36
616	8.5632	0	male	Kazak	YES	YES	NO	YES	YES	YES	NO	YES	YES	NO	69	170	68	23.5295	104	57	4.79	1.37	3.29	1.08	2.22	5.2	316.7	59.9	35	20	33	4.6	3	1.1	1	30	20	36	20	0.6	0.79	0.76	34.78	62.34	3.87	197.964	7.5	112.832	64.04
617	8.5632	0	male	Han	YES	NO	NO	YES	YES	YES	NO	NO	YES	NO	51	170	75	25.9518	141	87	4.18	1.57	4.88	1.22	3.88	5.8	432.3	80.2	38	23	36	5.1	3.4	1	1	31	20	37	25	0.49	0.67	0.73	33.33	79.37	5.65	220.67	8.17	119.663	61.68
618	8.5586	0	male	Han	NO	NO	NO	NO	NO	YES	NO	YES	NO	NO	56	178	83	26.1965	153	78	3.82	1.71	4.74	0.9	3.59	4	309	54	54	31	40	5.5	3.7	1.4	1.4	32	19	34	25	0.61	0.88	0.69	33.96	84.47	6.79	408.028	8.95	207.079	62.41
619	8.5573	0	female	Han	NO	NO	YES	NO	NO	YES	YES	NO	NO	NO	81	165	79	29.0179	125	77	6.59	0.99	5.78	0.99	2.59	7.5	305	74	30	20	35	4.9	3.4	1.1	1.1	26	18	35	23	0.65	0.85	0.76	31.91	61.4	4.91	236.272	6.5	128.332	59.98
620	8.5571	0	male	Han	NO	NO	NO	NO	NO	NO	NO	NO	NO	NO	17	156	35	14.3822	157	61	5.26	1.24	2.73	1.47	2.23	5.9	343.4	69.2	27	17	28	3.6	2.5	1	1	25	18	33	20	0.8	0.97	0.82	32.35	29.32	2.23	120.518	9.41	97.491	61.8
621	8.553	1	male	Han	NO	NO	NO	NO	YES	NO	NO	YES	NO	NO	37	180	77	23.7661	152	96	4.64	1.4	2.76	0.95	2.79	4.2	383	66	32	20	37	5.7	4.1	1.1	1.3	24	17	37	24	1.01	0.88	1.15	29.63	79.36	6.11	346.498	9.78	181.641	63.69
622	8.553	0	female	Han	NO	NO	NO	YES	YES	NO	NO	YES	NO	NO	66	173	89	29.7376	128	81	4.48	1.45	3.4	0.88	3.49	4.9	322	62	34	20	34	5.2	3.4	1	0.9	30	20	35	25	0.52	0.71	0.73	34.62	82.07	5.83	212.395	5.47	104.034	63.37
623	8.5467	0	male	Other	YES	YES	NO	NO	YES	NO	YES	NO	NO	NO	56	170	75	25.952	119	72	4.89	1.32	3.02	1.33	3.35	3.7	383	73	42	24	33	5	3.2	0.9	0.9	30	19	30	23	0.92	0.74	1.24	36	77.28	5.26	183.409	7.43	99.4573	65.36
624	8.5452	0	male	Han	NO	NO	NO	NO	YES	NO	YES	NO	YES	NO	67	175	75	24.4899	123	76	3.93	1.64	4.81	0.92	4.14	6.1	328.4	83.5	33	19	34	4.8	3	1	1	28	19	32	24	0.74	0.69	1.07	37.5	72.52	5.58	198.394	5.29	105.832	67.45
625	8.5449	0	male	Han	NO	NO	YES	NO	NO	NO	YES	NO	NO	NO	87	174	72	23.7816	96	70	7.24	0.89	7.1	1.12	1.6	6.7	412.33	88.93	33	22	33	4.9	3.5	1.1	1.1	31	20	34	23	0.56	0.78	0.72	29.79	58.23	5.12	236.272	5.89	130.646	56.89
626	8.5446	0	male	Han	NO	NO	YES	NO	NO	YES	NO	NO	YES	NO	76	158	73	29.243	147	92	4.21	1.53	2.87	1.09	3.07	1.4	334	56	36	22	33	4.5	2.9	0.8	0.8	29	21	31	21	0.8	0.65	1.23	35.56	60.24	4.34	127.69	7.62	73.1623	65.16
627	8.5445	0	female	Han	NO	NO	NO	NO	NO	YES	YES	YES	YES	NO	82	168	82	29.0536	125	65	5.7	1.13	4.95	0.63	1.45	7.65	308.03	123.84	34	22	36	5	3.5	0.9	0.9	28	20	33	21	0.55	0.79	0.7	30	67.37	5.73	183.409	6.53	96.689	56.98
628	8.5428	0	male	Kazak	YES	YES	NO	NO	YES	YES	NO	NO	YES	NO	44	178	95	29.9839	171	99	3.42	1.88	2.75	0.56	2.66	6.5	306	63	40	21	35	5	3.3	1.2	1.2	30	20	36	24	0.58	0.79	0.73	34	74.11	5.26	277.833	7.73	129.291	62.68
629	8.5422	0	female	Han	NO	NO	NO	YES	NO	NO	YES	YES	NO	NO	75	156	93	38.2151	108	79	5.06	1.27	2.4	1.09	3.95	5.9	350.6	71.8	34	20	31	4.8	3.2	1.2	1.2	29	19	34	24	0.65	0.87	0.75	33.33	66.56	5.19	259.562	8.67	130.492	61.9
630	8.5418	0	female	Uygur	NO	NO	YES	YES	NO	YES	NO	NO	YES	NO	54	182	123	37.1335	163	90	4.04	1.59	2.72	0.76	1.59	87	449	87	30	20	37	5.4	3.6	0.9	0.9	29	19	31	26	1.13	0.54	2.09	33.33	86.88	6.95	210.815	8.4	83.2703	61.48
631	8.5416	0	female	Han	NO	NO	NO	YES	NO	NO	YES	YES	NO	NO	57	164	60	22.3088	102	66	4.31	1.49	4.19	0.85	1.62	4.7	374.7	85.5				4.5	2.9	1	0.9					0.75	0.81	0.93	35.56	60.24	4.34	164.26	9.88	101.677	65.16
632	8.5392	0	male	Han	YES	YES	NO	NO	YES	NO	NO	NO	NO	NO	24	155	56	23.3092	134	68	5.62	1.14	4.05	1.42	1.71	4.7	283.6	67.9	30	18	30	4.5	2.9	0.8	0.8	24	17	31	19	0.94	1.03	0.91	36	60	4.16	127.69	10	84.5967	65
633	8.5391	0	female	Han	NO	NO	NO	NO	NO	NO	YES	YES	YES	NO	60	175	80	26.1228	132	83	4.89	1.31	5.19	1.16	2.49	5.4	317.5	98	32	20	31	4.9	3.2	0.9	0.9	26	18	30	21	0.56	0.91	0.62	34.69	71.85	5.39	176.839	11.2	91.2197	63.69
634	8.5365	0	female	Uygur	NO	NO	NO	NO	NO	NO	NO	NO	NO	NO	23	165	76	27.9158	139	86	3.92	1.63	4.28	1.18	3.81	3.3	195	43	34	19	35	4.8	3.1	0.9	0.9	28	18	33	26	0.57	0.78	0.73	35.42	69.6	5.36	170.38	8.14	93.2874	64.73
635	8.5263	0	male	Uygur	YES	YES	NO	NO	YES	YES	NO	YES	YES	NO	56	170	70	24.2217	150	75	4.72	1.34	4.71	0.63	3.29	7.35	282.71	93.66	51	35	33	5.6	3.8	1.2	1.2	30	20	35	23	0.65	0.77	0.84	33.33	86.88	6.52	336.239	7.22	191.143	61.48
636	8.5263	0	male	Han	NO	NO	NO	NO	YES	NO	NO	YES	NO	NO	43	158	54	21.6317	118	66	3.88	1.63	2.86	0.88	2.03	8.23	388.4	119.65	34	20	34	4.6	3	0.9	0.9	26	19	33	24	0.42	1.01	0.42	34.78	62.34	4.36	157.8	6	105.053	64.04
637	8.5246	1	male	Kazak	YES	NO	NO	YES	NO	YES	NO	NO	YES	NO	71	176	104	33.5753	124	60	6.13	1.03	3.35	0.79	3.35	10.5	345.2	125.3	34	21	44	5.6	3.9	1.3	1.3	25	17	39	27	1.02		2.57	32.08	80.91	6.88	377.182	8.56	169.848	65.81
638	8.5234	1	male	Uygur	YES	YES	NO	YES	YES	YES	YES	YES	YES	NO	54	162	62	23.6249	108	63	4.57	1.38	4.64	1.07	1.81	5.6	266	69	38	21	31	5.7	4.3	1.1	1.1	30	20	31	19	0.49	0.65	0.75	25.93	71.31	4.85	306.56	7.13	190.374	64.73
639	8.5197	0	female	Han	NO	NO	NO	YES	YES	YES	NO	YES	YES	NO	50	158	90	36.0528	167	92	5.37	1.17	4.05	1.17	3.13	5.6	432	51	31	21	39	4.8	3.2	1	1	31	21	37	25	0.74	1.04	0.71	33.33	66.56	4.59	198.394	8.22	101.072	61.9
640	8.5164	0	male	Uygur	NO	NO	NO	YES	YES	NO	YES	NO	YES	NO	85	158	56	22.4332	185	97	5.01	1.25	3.17	1.41	4.16	5.4	361.1	83.1	31	20	33	4.2	2.7	0.9	0.8	22	13	32	22	0.83	1.09	0.76	35.71	51.56	5.16	122.943	6.64	80.4756	65.61
641	8.5144	0	female	Han	NO	NO	NO	NO	NO	NO	YES	NO	NO	NO	50	172	71	24.0005	142	79	4.34	1.44	4.26	0.82	2.31	5.8	347	66	29	19	32	4.7	3.2	1.1	1.1	28	19	29	19	0.48	0.65	0.74	33.33	57.45	3.62	220.073	5.65	123.373	62.14
642	8.5125	0	female	Han	NO	NO	NO	NO	YES	NO	NO	YES	NO	NO	33	174	88	29.0663	139	96	4.69	1.33	3.09	0.82	3.94	6.4	463.4	62.2	35	22	39	5.1	3.6	0.9	1	30	20	38	22	0.57	0.78	0.73	29.41	69.38	4.58	205.163	6.71	102.147	56.04
643	8.5122	1	male	Han	YES	NO	YES	YES	YES	YES	YES	YES	YES	NO	59	175	65	21.2251	106	62	5.33	1.17	3.84	0.65	2.86	4.1	309.4	86.2	29	18	40	5.4	4.3	1.2	1	23	18	38	24	0.69	1.14	0.61	21.57	53.81	3.44	279.172	9.4	161.642	58.98
644	8.5096	0	female	Han	NO	NO	NO	YES	YES	NO	NO	YES	NO	NO	66	173	89	29.7375	128	81	4.38	1.42	3.6	0.88	1.7	4.9	322	62	34	20	34	5.2	3.4	1	0.9	30	20	35	25	0.52	0.71	0.73	34.62	82.07	5.83	212.395	5.47	105.412	63.37
645	8.5051	0	female	Han	NO	NO	NO	YES	YES	YES	NO	NO	YES	NO	66	171	82	28.0429	167	90	4.33	1.43	5.52	0.84	1.93	4.7	359	65				4.8	3.1	0.9	0.9					0.6	1.04	0.58	35.42	69.6	5.08	170.38	10	87.8339	64.73
646	8.5024	0	male	Uygur	NO	NO	NO	YES	NO	NO	NO	NO	NO	NO	54	174	75	24.7723	148	106	4.01	1.54	2.83	0.9	2.65	6.6	355	77				5.2	3.3	0.9	0.9					0.73	0.87	0.84	36.54	85.38	6.66	196.888	7.65	105.372	65.93
647	8.5023	0	male	Uygur	YES	YES	NO	NO	NO	NO	YES	YES	NO	NO	55	173	90	30.0717	160	90	5.02	1.23	3.97	1.28	1.6	3.91	343.61	60.26	39	23	41	5.3	3.6	0.9	0.9	36	25	39	25	0.65	0.74	0.88	32.08	80.91	6.31	203.795	6.95	100.52	59.78
648	8.5023	0	male	Han	NO	NO	NO	YES	NO	NO	YES	NO	YES	NO	55	176	68	21.9528	109	63	4.54	1.36	4.09	0.67	2.86	11.4	47	98	37	20	3	4.6	3.1	0.9	0.9	31	20	35	25	0.58	0.79	0.73	32.61	59.42	4.63	157.8	6.82	88.1025	61.04
649	8.5021	0	male	Han	YES	YES	NO	YES	YES	YES	NO	YES	YES	NO	60	168	74	26.2195	116	69	6.71	0.92	4.54	0.79	2.47	5	225.9	68.7	30	20	32	5.1	3.4	1	1	26	17	31	20	0.65	0.95	0.68	33.33	76.37	6.64	220.67	7.65	121.308	61.68
650	8.5009	0	female	Han	NO	NO	NO	NO	NO	NO	YES	NO	YES	NO	70	163	73	27.4757	128	79	5.27	1.17	4.34	0.69	3.4	4.4	272.6	75.8	30	18	32	4.5	2.8	0.9	0.9	26	16	34	22	0.56	0.8	0.7	37.78	62.9	4.34	151.679	8	85.4144	68.04
651	8.5003	0	female	Uygur	NO	NO	NO	NO	YES	NO	YES	NO	NO	NO	65	168	95	33.6597	142	100	5.01	1.23	3.65	0.72	1.31	1.06	293	49	31	19	40	4.9	3.2	1.2	1.2	26	18	35	25	0.86	0.55	1.56	34.69	71.85	5.46	268.623	11.87	128.657	63.69
652	8.4963	0	female	Han	NO	NO	NO	NO	NO	NO	YES	NO	NO	NO	55	171	90	30.7796	144	104	4.91	1.25	4.26	1.16	3.78	3.9	295.9	71.5	35	20	39	4.6	3	1.2	1.2	31	19	36	23	0.65	0.8	0.81	34.78	62.34	4.3	241.891	9.29	120.033	64.04
653	8.4958	0	female	Han	NO	NO	NO	NO	YES	NO	NO	NO	NO	NO	36	175	90	29.3884	122	72	4.26	1.44	3.85	0.98	3.95	5.8	433.3	72	30	20	38	4.4	2.9	1.1	1	28	20	38	26	0.56	0.83	0.67	34.09	55.48	3.38	183.419	7.47	89.9287	63.27
654	8.4936	0	male	Han	NO	NO	NO	NO	NO	NO	YES	NO	YES	NO	50	182	96	28.9824	139	83	4.82	1.27	4.74	0.86	2.07	4.3	367	63	38	22	42	4.7	3.2	1	1	33	23	37	24	0.6	0.98	0.61	31.91	61.4	4.18	191.218	4.14	87.4697	59.98
655	8.4933	0	male	Kazak	NO	NO	YES	YES	NO	NO	YES	YES	YES	NO	45	160	59	23.0471	128	67	5.23	1.17	5.84	1.08	1.86	4.8	262	50	30	19	30	4.8	3.5	0.9	0.9	24	17	34	23	0.83	0.92	0.9	27.08	56.65	4.31	170.38	9.76	107.952	52.69
656	8.4884	0	male	Han	NO	NO	NO	NO	YES	YES	NO	NO	NO	NO	46	170	80	27.6826	160	94	3.98	1.53	2.91	0.89	1.5	5	344.7	79.9	36	20	35	4	2.7	0.9	0.9	27	18	32	20	0.67	0.79	0.85	32.5	42.98	4	122.756	8.93	64.3344	61.4
657	8.4882	0	male	Han	NO	YES	NO	NO	NO	NO	NO	NO	NO	NO	28	172	83	28.0563	123	60	4.91	1.24	5.23	1.12	3.47	4.73	294.74	65.78	34	21	40	4.9	3.2	0.9	0.9	30	20	36	23	0.52	0.77	0.68	34.69	71.85	5.1	176.839	6.12	90.2836	63.69
658	8.4861	0	female	Han	NO	NO	NO	NO	YES	NO	YES	NO	NO	NO	57	172	80	27.0424	130	95	3.66	1.66	4.04	0.87	3.22	5.4	550.6	79.4	33	23	37	4.7	3.1	1	0.9	29	20	36	24	0.81	0.63	1.29	34.04	64.44	4.7	177.42	7.04	92.3918	62.95
659	8.4854	0	male	Other	YES	NO	NO	NO	YES	NO	YES	NO	NO	NO	45	170	65	22.4914	162	96	4.67	1.3	2.55	1.61	1.31	7.7	269.7	79.7	40	23	37	4.7	3.1	1	0.9	26	18	35	24	0.64	0.75	0.85	34.04	64.44	4.9	177.42	7.53	103.385	62.95
660	8.4847	0	male	Kazak	YES	NO	NO	YES	NO	NO	NO	NO	YES	NO	64	175	90	29.3886	132	88	3.84	1.58	5.23	0.83	3.25	4.8	292	70	38	20	33	5.2	3.4	1	1	29	18	36	23	0.73	0.5	1.46	34.62	82.07	5.33	228.346	5.1	110.493	63.37
661	8.4834	0	male	Han	YES	YES	NO	NO	YES	NO	YES	NO	NO	NO	34	176	98	31.638	122	82	4.59	1.32	3.29	1.06	2.96	7.9	382	93.8	33	21	31	5	3.4	1	1	27	18	33	19	0.88	0.68	1.29	33.33	66.56	4.93	213.12	7.04	99.3242	61.9
662	8.4817	0	male	Han	YES	YES	YES	NO	NO	NO	YES	NO	NO	NO	62	160	60	23.4384	137	70	5.17	1.17	3.01	1.01	2.72	4.8	236.7	61.3	35	22	34	5.2	3.5	1.1	1.1	27	15	33	22	0.69	0.87	0.79	34	74.11	4.97	261.601	7.67	166.296	62.68
663	8.4816	0	male	Han	NO	NO	NO	YES	YES	YES	NO	NO	YES	NO	55	158	66	26.4386	144	59	5.04	1.2	3.66	1.38	1.53	5.3	249	58	8	20	30	4.5	3	0.8	0.8	29	19	30	24				33.33	57.45	4.31	127.69	8.4	77.1216	62.14
664	8.479	0	male	Other	YES	YES	YES	YES	NO	NO	YES	NO	YES	NO	66	161	66	25.4623	102	62	4.57	1.32	2.33	1	4.51	4.37	387.98	63.49	32	20	30	4.2	2.7	0.8	0.8	28	20	33	22	0.52	0.85	0.61	35.71	51.56	4.02	112.265	7.43	67.0639	65.61
665	8.4784	0	male	Han	YES	YES	NO	NO	YES	YES	YES	NO	NO	YES	48	165	65	23.8759	145	62	4.71	1.28	4.4	0.6	2.93	2.9	563.9	75.4	44	23	41	5.3	3.5	1	0.9	30	20	36	26	0.56	0.8	0.7	33.96	84.47	6.17	219.746	7	130.367	62.41
666	8.4781	0	male	Han	YES	NO	NO	NO	YES	NO	NO	NO	NO	NO	51	156	70	28.7641	133	57	4.94	1.22	2.4	1.01	3.08	4.1	216	36	27	20	41	4.3	2.8	0.9	0.9	22	16	34	25	0.52	0.81	0.64	34.88	53.52	3.96	139.773	7.19	82.4765	64.43
667	8.4746	0	male	Han	NO	NO	NO	NO	NO	NO	YES	NO	NO	NO	37	165	105	38.5684	151	78	6.6	0.91	2.97	0.99	2.17	5.3	294.3	51.1	35	20	41	5.2	3.5	1	1	26	17	35	25	0.68	0.51	1.33	32.69	78.64	5.9	228.346	5.92	103.907	60.72
668	8.4737	0	female	Han	NO	NO	NO	NO	YES	NO	NO	NO	NO	NO	49	173	86	28.7356	123	59	4.38	1.37	2.96	1.22	1.69	2.9	365.3	78.8	38	19	36	4.9	3.2	1	0.9	29	20	35	23	0.68	0.88	0.77	34.69	71.85	5.46	191.054	7.65	95.3746	63.69
669	8.4705	0	female	Han	NO	NO	NO	YES	YES	YES	NO	NO	YES	NO	66	165	64	23.5086	120	64	5.59	1.07	3.57	0.67	2.24	9.8	364.6	93.6	34	21	35	4.8	3.2	0.9	0.9	31	20	36	31	0.52	0.77	0.68	33.33	66.56	4.93	170.38	6.93	101.853	61.9
670	8.4699	0	female	Han	NO	NO	NO	YES	NO	NO	NO	NO	NO	NO	77	178	120	37.8742	161	93	4.27	1.4	3.09	0.81	3.42	4.1	360	57	39	24	38	6	4.2	1.5	1.4	33	22	36	20	0.85	0.66	1.29	31.03	96.56	7.15	494.928	6.3	203.431	57.97
671	8.4692	1	male	Han	NO	NO	NO	NO	NO	YES	YES	YES	NO	NO	77	151	50	21.9295	134	63	4.56	1.31	2.36	0.77	2.02	5.5	347.8	79	28	18	36	4.9	3.4	1.2	1.2	36	26	43	30	0.48	0.84	0.57	32.61	59.42	4.75	268.623	6.65	192.81	64.73
672	8.4667	0	male	Han	YES	YES	YES	NO	NO	YES	YES	NO	NO	NO	67	160	73	28.5161	141	69	5.9	1.01	3.57	1.4	3.02	5.2	240	52				4.6	3.1	0.9	0.8					0.82	1.03	0.8	32.61	59.42	4.04	145.219	10	82.6284	61.04
673	8.4658	1	male	Han	YES	YES	NO	YES	NO	YES	NO	NO	YES	NO	78	168	56	19.8418	111	47	4.92	1.21	3.67	1.32	2.85	5	267	69	28	17	28	4.7	3.2	1.2	1.2	23	18	34	22	0.77	0.59	1.31	34.09	55.48	4.6	250.652	7.29	159.458	61.48
674	8.4656	0	female	Han	NO	NO	NO	NO	YES	NO	YES	NO	YES	NO	57	164	76	28.2578	145	81	4.65	1.28	4.93	1.29	4.13	3.6	4.65	61.3	34	20	34	4.7	3.2	1.2	1.2	27	17	33	23	0.72	0.68	1.06	33.33	57.45	4.25	250.652	7.47	139.445	62.14
675	8.4652	0	female	Han	NO	NO	NO	NO	YES	YES	YES	YES	NO	YES	43	159	63	24.9205	142	82	4.76	1.25	4.08	1.08	2.58	5.1	277	59	33	17	32	4.7	3.2	1	0.9	30	18	28	20	0.53	0.86	0.62	31.91	61.4	4.54	177.42	6.93	109.289	59.98
676	8.4651	0	male	Han	YES	YES	NO	YES	YES	YES	NO	YES	YES	NO	60	168	74	26.2197	116	69	6.61	0.9	3.72	0.79	1.79	5	225.9	68.7	30	20	32	5.3	3.6	1.2	1.2	26	17	31	20	0.65	0.95	0.68	33.33	76.37	6.64	306.362	7.65	170.495	61.68
677	8.4634	0	male	Han	NO	YES	NO	NO	NO	NO	NO	NO	NO	NO	43	162	72	27.4349	130	79	4.64	1.28	4.88	1.28	1.83	6.9	348	77				4.2	2.8	0.8	0.8					1.02	0.62	1.65	33.33	49.03	2.79	112.265	10	63.8995	62.4
678	8.461	0	male	Other	YES	YES	NO	NO	NO	NO	NO	NO	NO	NO	39	177	90	28.7281	159	110	3.95	1.5	4.15	1	2.7	4.7	560.5	75.1	32	22	34	4.9	3.2	1	1	28	17	34	27	0.78	0.63	1.24	34.69	71.85	5.32	205.694	6.78	98.9486	63.69
679	8.461	0	male	Han	YES	YES	NO	YES	YES	NO	YES	YES	YES	NO	44	175	76	24.8164	165	78	4.74	1.25	5.91	1.14	2.57	4.7	252	46	34	19	38	4.9	3.2	1	0.9	25	20	30	21	0.88	1.22	0.72	34.69	71.85	4.89	191.054	8.8	101.226	63.69
680	8.4565	0	male	Other	NO	NO	NO	YES	NO	NO	YES	NO	YES	NO	56	165	80	29.3856	132	82	5.84	1.01	2.76	0.97	3.45	5.6	355.6	84	35	22	40	5	3.3	1	1	30	20	36	24	0.56	0.75	0.75	34	74.11	5.93	213.12	7.47	113.507	62.68
681	8.4563	0	male	Han	YES	NO	NO	YES	NO	NO	NO	NO	YES	NO	63	163	82	30.8634	104	60	3.78	1.56	4.93	0.93	2.8	8.5	336.7	55.9	34	21	33	4.9	3.4	1.1	1.1	28	19	34	23	0.84	0.65	1.29	31.91	61.4	4.79	236.272	7.64	126.593	59.98
682	8.4547	0	female	Han	NO	NO	NO	NO	YES	NO	NO	NO	NO	NO	54	168	71	25.1567	131	79	6.07	0.97	4.6	0.79	3.16	6.8	311.5	69.5				4.9	3.2	0.9	0.9					0.49	0.82	0.6	34.69	71.85	5.6	176.839	2.03	99.3085	63.69
683	8.4546	0	male	Han	YES	YES	YES	YES	YES	NO	YES	YES	YES	NO	58	175	85	27.7559	165	88	4.46	1.32	3.69	1.14	2.76	2.9	233.9	65.9	32	23	40	4.7	3.1	0.9	0.9	29	19	32	23	0.67	0.99	0.68	34.04	64.44	5.03	164.034	10.42	82.967	62.95
684	8.4497	0	male	Han	YES	YES	NO	NO	YES	YES	NO	NO	NO	NO	39	162	59	22.4815	163	87	4.04	1.45	3.33	1.56	1.83	6.1	211	67				4.5	3	0.8	0.8					0.7	0.92	0.76	33.33	57.45	4.08	127.69	8.4	80.2831	62.14
685	8.4452	0	male	Han	NO	NO	NO	NO	NO	NO	NO	NO	NO	NO	17	156	35	14.3826	157	61	4.86	1.2	3.3	1.47	2.23	5.9	343.4	69.2	27	17	28	3.4	2.3	0.8	0.8	25	18	33	20	0.8	0.97	0.82	32.35	29.32	2.23	75.5238	9.41	61.0935	61.8
686	8.445	0	male	Uygur	NO	NO	NO	NO	NO	NO	NO	YES	YES	NO	66	180	86	26.5437	147	78	6.78	0.86	5.02	0.89	1.62	5.46	295.01	66.95	32	23	35	5.1	3.6	0.9	0.9	26	16	33	26	0.56	0.7	0.8	29.41	69.38	5.27	190.092	7.58	94.1005	56.04
687	8.4445	0	male	Han	NO	NO	YES	NO	NO	YES	YES	NO	NO	NO	91	174	71	23.4509	128	80	3.76	1.55	5.19	1.01	3.93	4.1	312.2	64.1	34	22	36	4.6	3	1	0.9	29	19	33	25	1.14	0.99	1.15	34.78	62.34	4.08	170.781	7.43	93.9749	64.04
688	8.4414	0	female	Uygur	NO	NO	NO	YES	NO	YES	NO	NO	YES	NO	70	165	75	27.5492	149	79	4.21	1.38	4.85	1.32	4.61	5.8	391.2	87.3	31	24	35	4.9	3.3	1.2	1.1	30	25	36	24	0.82	0.53	1.55	34.04	64.44	4.96	252.223	6.83	140.82	62.95
689	8.4369	0	male	Uygur	NO	NO	NO	NO	NO	YES	NO	YES	NO	NO	65	175	60	19.5919	145	69	4.82	1.2	2.76	0.88	4	3.9	315	68	37	24	39	4.8	3.2	1	0.9	31	21	36	26	0.62	0.86	0.72	33.33	66.56	4.59	184.178	8.86	109.46	61.9
690	8.4362	0	male	Han	NO	NO	NO	NO	YES	NO	YES	NO	NO	NO	49	176	72	23.244	119	80	4.25	1.36	3.63	1.15	1.52	3.1	353.1	79	42	21	34	4.9	3.1	0.9	0.9	31	19	35	23	0.76	0.62	1.23	36.73	74.89	5.77	176.839	7.43	95.9879	66.39
691	8.4284	1	male	Kazak	YES	NO	NO	YES	NO	YES	NO	YES	YES	NO	56	172	81	27.38	112	72	3.7	1.55	5.31	0.58	2.97	3.8	425	63	33	18	38	4.4	2.9	0.9	0.9	31	19	32	25	0.65	0.78	0.83	34.09	55.48	3.99	145.67	15.44	76.3148	63.27
692	8.4276	0	male	Han	NO	NO	NO	YES	NO	YES	YES	NO	YES	NO	54	157	55	22.3142	155	79	4.94	1.16	2.25	1.24	4.46	4.5	323	72	35	23	35	4.8	3.2	0.9	0.9	27	18	33	23	0.55	0.79	0.7	33.33	66.56	4.99	170.38	10.29	112.924	61.9
693	8.426	0	male	Han	YES	YES	NO	YES	NO	YES	YES	NO	YES	NO	85	168	88	31.18	179	104	3.51	1.63	3.73	1	3.46	7.2	366	65	35	23	41	5.5	3.7	1.4	1.4	30	21	34	23	0.75	0.6	1.25	33.96	84.47	6.42	408.028	6.09	206.922	62.41
694	8.4247	0	female	Han	NO	NO	NO	NO	YES	NO	NO	NO	NO	NO	38	156	50	20.5464	127	66	5.39	1.06	3.55	1.12	2.33	3.78	269.41	56.49	32	20	32	4.3	2.8	0.8	0.8	27	18	31	22	0.83	1.05	0.79	34.88	53.52	4.55	117.307	12.77	81.5367	64.43
695	8.4233	0	female	Other	NO	NO	YES	NO	NO	YES	NO	NO	NO	NO	58	160	51	19.9225	134	76	4.29	1.33	5.73	1.42	3.79	6	270	60	27	18	28	4.8	3.2	1	1	26	18	33	20	0.9	0.82	1.1	34.78	62.34	4.36	198.394	8.18	135.83	64.04
696	8.4229	0	male	Han	NO	NO	NO	NO	NO	NO	NO	NO	NO	NO	45	168	78	27.6364	107	64	5.88	0.97	3	0.94	1.3	5.3	272	58	31	21	38	5	3.2	0.8	0.8	32	20	34	26	1.02	0.85	1.2	36	77.28	5.8	155.396	7.56	83.0861	65.36
697	8.4222	0	male	Han	YES	NO	NO	YES	NO	YES	YES	NO	NO	NO	71	173	81	27.0648	122	74	4.71	1.21	3.26	0.95	1.14	5.3	158	65	34	19	39	4.7	3.1	1.1	1	31	21	34	26	0.63	1.05	0.6	34.04	64.44	4.83	205.433	10.13	105.937	62.95
698	8.4214	0	male	Uygur	YES	YES	NO	YES	YES	NO	YES	YES	NO	NO	54	157	56	22.7194	137	86	4.63	1.23	4.96	1.21	2.23	4.1	188.7	69.4	31	20	32	4.5	3	0.9	0.9	30	21	33	23	0.63	0.85	0.74	33.33	57.45	4.48	151.679	7.41	99.6838	62.14
699	8.4194	0	male	Han	YES	YES	NO	NO	YES	NO	YES	NO	YES	NO	39	164	68	25.2829	118	75	4.21	1.35	4.84	0.98	1.98	4.8	296	58	31	21	31	4.7	3.2	1	1	26	18	31	20	0.88	0.7	1.26	33.33	57.45	4.31	191.218	6.29	112.647	62.14
700	8.4194	0	male	Han	YES	YES	YES	NO	NO	YES	NO	NO	NO	NO	59	170	69	23.8761	183	100	4.44	1.28	2.54	1.01	1.64	5.9	497.7	75.1	40	23	39	5.7	4	0.9	0.9	28	20	34	23	0.8	1.1	0.73	29.82	90.04	6.48	232.549	8	131.584	56.26
701	8.4181	0	female	Han	NO	NO	NO	NO	NO	NO	NO	NO	NO	NO	81	173	89	29.7376	114	57	6.6	0.86	5.82	0.64	1.65	3.9	237.2	53.8	33	25	42	5.7	4.1	0.9	0.9	29	18	32	26	0.62	0.49	1.27	28.07	85.82	7.29	232.549	8.4	113.905	53.62
702	8.4135	0	male	Han	YES	YES	NO	NO	YES	YES	NO	NO	YES	NO	42	168	115	40.7462	102	80	5.09	1.11	4.01	0.91	2.76	6.3	296.3	60.8	30	19	32	5.2	3.5	1.4	1.4	31	20	35	25	0.61	0.76	0.8	34	74.11	4.97	372.648	4.52	161.361	62.68
703	8.4108	0	male	Han	YES	NO	YES	YES	YES	YES	NO	NO	YES	NO	56	168	86	30.4711	127	68	5.75	0.98	2.92	1.61	2.01	7	234	45	34	22	34	4.7	3.2	0.9	0.9	28	20	34	21	0.57	0.9	0.63	31.91	61.4	4.61	164.034	10.36	83.1521	59.98
704	8.4068	0	male	Other	YES	YES	NO	NO	NO	NO	NO	NO	NO	NO	46	168	65	23.031	152	102	4.88	1.15	3.55	1.69	3.2	4.1	315	48				4.3	2.7	0.8	0.8					0.43	0.88	0.49	37.21	56.05	4.2	117.307	8.13	68.8461	67.47
705	8.4055	0	female	Han	NO	NO	NO	NO	YES	NO	YES	YES	NO	NO	57	166	96	34.8382	133	82	5.9	0.95	3.07	0.75	2.24	4.31	381.64	49.64	30	22	31	4.8	3.2	0.9	0.9	29	20	34	21	1.05	0.64	1.64	33.33	66.56	5.19	170.38	7.5	81.5802	61.9
706	8.4051	0	male	Han	NO	NO	NO	NO	YES	NO	NO	YES	NO	NO	43	158	54	21.6313	118	66	3.48	1.61	4.04	0.88	1.4	8.23	388.4	119.65	34	20	34	4.6	3	0.9	0.9	26	19	33	24	0.42	1.01	0.42	34.78	62.34	4.36	157.8	6	106.198	64.04
707	8.4035	0	male	Han	YES	NO	NO	YES	YES	NO	YES	YES	YES	NO	73	162	63	24.0057	150	87	9.17	0.61	3.22	1.42	3.85	6.17	306.66	55.04	39	23	30	4.9	3.2	0.9	0.9	26	17	34	20	0.84	0.99	0.85	34.69	71.85	5.6	176.839	10.59	108.971	63.69
708	8.4035	0	male	Han	YES	NO	NO	YES	YES	NO	YES	YES	YES	NO	73	162	63	24.0062	150	87	9.17	0.61	4.01	1.42	2.25	6.17	306.66	55.04	39	23	30	4.9	3.2	0.9	0.9	26	17	34	20	0.84	0.99	0.85	34.69	71.85	5.6	176.839	9.41	107.717	63.69
709	8.4032	0	female	Han	NO	NO	NO	NO	YES	YES	NO	NO	NO	NO	65	170	60	20.7621	163	114	4.66	1.2	2.81	1.51	3.31	3	202.6	53.8	27	17	32	4.1	2.7	0.9	0.9	28	19	30	22	0.94	0.8	1.18	34.15	47.2	3.4	128.316	7.83	77.6686	63.59
710	8.401	0	female	Han	YES	YES	NO	NO	YES	YES	YES	NO	NO	NO	46	160	66	25.7814	116	64	4.65	1.2	3.06	1.14	2.17	5	355	63.6	35	21	40	4.7	3.1	0.9	0.9	29	19	36	30	0.65	0.82	0.79	34.04	64.44	4.51	164.034	9.29	99.5292	62.95
711	8.3976	0	male	Han	NO	NO	NO	NO	YES	YES	YES	YES	NO	NO	22	166	80	29.0321	146	111	4.15	1.34	3.22	0.81	3.39	6.9	287	68				5	3.2	1	1					0.66	0.82	0.8	36	77.28	6.72	213.12	8.48	113.139	65.36
712	8.3974	0	male	Han	NO	YES	NO	YES	NO	NO	NO	YES	YES	NO	81	172	82	27.7178	164	90	6.95	0.8	4.63	1.04	0.72	4.2	236.7	72.1	36	19	39	4.7	3	1	1	31	18	36	24	0.56	0.66	0.85	36.17	67.36	5.25	191.218	9.33	98.2669	65.81
713	8.3964	0	male	Han	YES	YES	NO	NO	YES	YES	YES	NO	NO	NO	48	175	88	28.7351	122	56	4.24	1.31	4.19	0.95	1.29	6.66	354.47	107.82	35	21	37	4.8	3.2	1	0.9	29	19	35	25	0.89	1.02	0.87	33.33	66.56	4.59	184.178	11.87	91.4215	61.9
714	8.3904	0	female	Uygur	NO	NO	NO	NO	NO	NO	YES	NO	NO	NO	63	165	63	23.1408	171	62	5.36	1.03	5.24	1.4	1.71	4.77	346.78	69.85	37	20	30	4.8	3.1	1	1	26	17	32	23	0.72	1.04	0.698	35.42	69.6	3.76	198.394	9.29	120.891	64.73
715	8.3872	0	male	Uygur	NO	NO	NO	NO	NO	YES	YES	NO	NO	NO	37	176	83	26.7957	116	64	4.87	1.13	3.79	1.07	1.5	5.3	311	62	32	21	37	4.8	3.1	0.9	0.9	30	20	34	22	0.53	0.75	0.71	35.42	69.6	5.36	170.38	6.33	85.9161	64.73
716	8.3864	0	female	Han	NO	NO	NO	NO	NO	YES	NO	NO	NO	NO	40	160	78	30.4694	164	96	4.23	1.3	5.53	1.06	3.85	7	331.4	70.5	28	18	27	4.1	2.7	0.8	0.8	27	18	30	20	0.79	1.01	0.78	34.15	47.2	3.59	107.323	2.03	59.6868	63.59
717	8.3831	0	female	Han	NO	NO	NO	NO	NO	YES	NO	NO	NO	NO	41	185	82	23.96	132	71	4.42	1.24	4.4	0.62	4.65	4.8	402	71	33	18	34	5.3	3.5	0.9	0.9	25	18	32	22	0.76	0.93	0.82	33.96	84.47	5.66	203.795	7.65	100.63	62.41
718	8.3829	0	female	Uygur	NO	NO	YES	YES	NO	NO	NO	YES	YES	NO	67	161	63	24.3054	127	75	4.12	1.33	5.73	1.47	2.47	6.3	323	54	31	19	31	4.5	3	1	0.9	27	18	32	24	0.61	0.71	0.86	33.33	57.45	4.37	164.26	7.18	100.428	62.14
719	8.382	0	male	Han	YES	YES	YES	YES	NO	YES	NO	YES	YES	NO	54	176	68	21.9533	139	67	7.11	0.77	3.28	1.16	1.69	3.7	296	65	36	21	42	4.9	3.3	1.2	1.1	29	19	36	25	0.47	0.81	0.58	340.4	64.44	5.03	252.223	6.27	142.442	62.95
720	8.3784	0	male	Uygur	YES	YES	NO	YES	YES	NO	NO	YES	YES	NO	49	168	76	26.9274	169	95	5.51	0.99	4.93	0.95	2.2	7	328	83	36	19	34	4.9	3.3	1	1	26	19	34	23	0.72	0.68	1.06	32.65	68.88	5.29	205.694	11.9	111.506	60.88
721	8.3775	0	female	Han	NO	NO	NO	NO	NO	NO	YES	NO	NO	NO	57	168	70	24.8018	145	79	5.45	1	2.9	1.33	4.46	8.2	271	66	33	20	40	5	3.3	1	1	29	18	35	31	0.84	0.95	0.88	34	74.11	6.23	213.12	10.5	120.55	62.68
722	8.3769	0	female	Han	NO	NO	YES	YES	NO	NO	NO	YES	YES	NO	64	162	50	19.0528	101	69	5.34	1.02	4.88	1.08	2.58	3.2	237.4	67.4	30	20	33	4.4	2.9	0.9	0.9	27	17	34	23	0.65	0.77	0.84	34.09	55.48	4.33	145.67	6.84	99.7533	63.27
723	8.3763	0	male	Han	YES	YES	NO	NO	NO	NO	NO	NO	NO	NO	50	180	75	23.149	147	88	4.22	1.29	3.33	0.73	1.59	5.4	387	63				5.3	3.6	0.9	0.9					0.63	0.88	0.72	32.08	80.91	6.63	203.795	7.43	106.974	59.78
724	8.3727	0	female	Han	NO	NO	NO	NO	YES	NO	YES	YES	NO	NO	67	158	53	21.2311	151	88	4.52	1.2	3.69	1.6	1.48	7.9	258	69	30	19	32	4.5	3	0.8	0.9	26	18	34	23	0.74	0.68	1.09	33.33	57.45	4.31	139.491	10	93.6622	62.14
725	8.3709	0	male	Other	YES	YES	NO	NO	YES	YES	NO	NO	NO	NO	54	184	79	23.3346	141	79	4.55	1.19	5.59	0.94	2.06	6.4	362	65				4.6	2.9	1	1					0.58	0.84	0.69	36.96	65.13	4.95	184.166	7.65	92.9805	66.91
726	8.3671	0	male	Han	NO	NO	YES	NO	NO	YES	YES	NO	NO	NO	51	173	85	28.4015	122	72	4.35	1.24	3.2	0.99	2.96	5.3	375	63	34	21	36	4.8	3.2	0.9	0.9	31	22	35	23	0.81	0.56	1.45	33.33	66.56	4.73	170.38	6.75	85.601	61.9
727	8.3643	0	male	Han	NO	YES	NO	NO	YES	YES	NO	NO	NO	NO	39	180	87	26.8524	148	78	4.89	1.1	3.97	0.86	1.86	6.2	419.8	87.5	38	23	38	4.9	3.3	0.9	0.9	28	19	35	19	0.56	1.13	0.5	32.65	68.68	5.91	176.839	5.89	85.8982	60.88
728	8.3621	0	male	Kazak	YES	NO	NO	YES	NO	NO	NO	NO	YES	NO	71	175	60	19.5919	120	72	6.03	0.89	2.65	0.84	1.83	5.8	260	72	35	21	32	5.1	3.5	0.9	0.9	29	19	34	24	0.63	0.82	0.77	31.37	72.94	5.84	190.092	6.3	114.197	58.91
729	8.3614	0	male	Han	YES	NO	NO	NO	NO	YES	NO	NO	NO	NO	56	175	90	29.388	109	72	4.19	1.28	3.31	1.12	1.45	4.4	266	56	41	22	35	4.8	3.3	0.9	0.9	28	20	33	23	0.5	0.69	0.72	31.25	63.39	5.39	170.38	9.09	82.4447	58.96
730	8.3586	0	male	Han	NO	NO	NO	NO	YES	NO	YES	NO	NO	NO	63	172	75	25.3524	164	97	6.77	0.79	4.41	1.35	2.24	6.05	298.24	66.02	30	18	35	5	3.3	1.1	1.1	26	17	35	21	0.74	0.87	0.85	35.42	69.6	5.71	244.578	10.57	133.372	64.73
731	8.3555	0	male	Han	NO	NO	NO	NO	YES	NO	NO	NO	NO	NO	54	180	80	24.6921	118	82	5.03	1.06	3.14	0.89	3.03	4.1	342.5	77				4.4	3	0.9	0.9					0.8	0.67	1.19	31.82	52.69	4.74	145.67	8.13	73.9778	60.09
732	8.3548	0	female	Uygur	NO	NO	YES	NO	NO	NO	YES	YES	YES	NO	80	174	78	25.7632	167	93	4.13	1.29	3.24	0.9	1.57	3.1	264	79.1	33	21	35	5	3.3	1.2	1.2	28	18	35	21	0.75	0.58	1.29	34	74.11	5.78	277.833	7.22	145.699	62.68
733	8.3532	0	female	Uygur	NO	NO	NO	NO	YES	NO	YES	NO	YES	NO	56	175	60	19.5925	174	92	4.47	1.19	6.2	1.13	3.69	4.1	348.1	79.1	33	16	35	5	3.2	0.9	0.9	26	19	34	22	0.69	1.02	0.68	36	77.28	5.02	183.409	7.62	109.004	65.36
734	8.3503	0	male	Han	NO	NO	NO	YES	NO	YES	YES	YES	YES	NO	60	165	62	22.7733	135	88	4.42	1.2	3.92	1.04	2.83	4.1	321	56	29	19	32	4.8	3.2	0.9	0.9	27	16	33	24	0.69	0.74	0.93	33.33	65.56	4.99	170.38	9.86	103.436	61.9
735	8.3499	0	male	Han	YES	YES	NO	YES	YES	NO	NO	YES	YES	NO	46	155	56	23.3097	138	74	4.82	1.1	2.3	1.02	3.19	4.4	202.6	59.5	26	19	28	4.5	3	0.9	0.9	26	18	31	20	0.79	1.01	0.78	33.33	57.45	4.48	151.679	7.9	100.49	62.14
736	8.3476	0	male	Kazak	YES	YES	NO	YES	NO	YES	NO	YES	NO	NO	71	165	93	34.1602	131	77	3.48	1.52	3.4	1.31	3.4	6.41	189.24	64.18	31	21	42	5.3	3.5	1.1	1.1	30	20	39	23	0.72	1.15	0.63	35.29	79.68	6.22	270.318	9	134.08	64.36
737	8.3476	0	male	Kazak	YES	YES	NO	YES	NO	YES	NO	YES	YES	NO	71	165	93	34.1603	131	77	3.48	1.52	3.91	1.31	2.36	6.41	189.24	64.18	31	21	42	5.1	3.3	0.9	0.9	30	20	39	23	0.72	1.15	0.63	35.29	79.68	6.22	190.092	9	93.0002	64.36
738	8.3454	0	male	Han	YES	YES	YES	NO	NO	YES	YES	NO	NO	NO	67	160	73	28.5162	141	69	5.8	0.91	3.68	1.4	4	5.2	240	52	30	20	32	4.6	3.1	0.9	0.8	26	17	33	18	0.82	1.03	0.8	32.61	59.42	4.04	145.219	9.88	83.671	61.04
739	8.3452	1	male	Uygur	NO	NO	NO	YES	NO	NO	YES	NO	YES	NO	59	175	103	33.6329	163	88	3.88	1.36	4.94	0.95	1.1	6	406.9	116.4	35	18	33	5.2	3.5	1.2	1.2	28	18	35	25	0.72	0.88	0.82	34.69	71.85	5.39	296.703	11.29	134.736	66.29
740	8.3424	0	female	Han	NO	NO	NO	NO	NO	YES	YES	YES	NO	NO	39	158	86	34.4505	156	79	3.68	1.43	4.19	0.93	2.79	4.1	218	51	26	17	35	4.9	3.3	0.8	0.8	30	19	30	21	0.78	1.05	0.74	32.65	68.68	6.73	149.655	10.4	79.3547	60.88
741	8.3411	0	male	Han	YES	YES	NO	NO	YES	YES	NO	NO	NO	NO	32	167	60	21.5143	114	69	4.57	1.15	4.41	1.06	2.72	4	250	59				4.4	2.8	0.8	0.8					0.67	0.48	1.4	36.36	58.14	4.07	122.449	2.03	74.9471	66.3
742	8.3377	0	male	Han	YES	NO	NO	NO	NO	NO	NO	NO	NO	NO	49	172	75	25.3523	156	80	4.19	1.25	3.35	1.18	1.06	5.6	431	71	31	17	32	4.7	3.1	0.9	0.9	24	15	35	22	0.78	0.91	0.86	34.04	64.44	4.38	164.034	10.4	88.3661	62.95
743	8.3346	0	female	Han	NO	NO	YES	YES	NO	NO	YES	NO	YES	NO	71	165	69	25.3453	175	65	4.58	1.14	5.37	0.86	2.68	4.3	410.5	79.8	32	20	32	4.6	3	0.9	0.9	25	16	33	23	0.56	0.77	0.73	34.78	62.34	4.49	157.8	7	91.9529	64.04
744	8.3345	0	female	Han	NO	NO	NO	NO	YES	NO	YES	NO	NO	NO	56	165	83	30.4873	130	77	4.62	1.13	3.44	1.35	3.38	4.6	196	64	30	19	30	4.5	3	0.8	0.8	27	18	32	23	0.65	0.88	0.74	33.33	57.45	4.02	127.69	7.65	66.6442	62.14
745	8.3338	0	female	Kazak	NO	NO	NO	NO	NO	NO	YES	NO	NO	NO	56	165	98	35.9966	125	95	4.7	1.11	4.17	1.03	1.68	4.66	280.15	70.94	31	21	34	4.9	3.3	0.9	0.9	28	19	33	23	0.77	0.68	1.17	32.65	68.68	4.6	176.839	7	83.8893	60.88
746	8.3334	0	female	Other	NO	NO	NO	NO	YES	YES	NO	NO	NO	NO	56	181	60	18.3153	116	95	4.24	1.23	4.4	0.93	2.13	5.6	331	62	33	21	34	5.3	3.5	0.9	0.9	26	17	32	22	0.89	0.75	1.19	33.96	84.47	6	203.795	8.48	118.541	62.41
747	8.3249	0	male	Kazak	YES	YES	NO	YES	YES	YES	NO	YES	NO	NO	59	171	80	27.3592	135	100	4.17	1.24	4.06	0.7	2.13	7.6	376.2	128	35	21	39	5.1	3.4	1	0.9	30	20	35	24	0.72	0.89	0.81	33.33	76.37	6.11	205.163	9.6	108.54	61.68
748	8.3245	0	female	Han	NO	NO	NO	NO	NO	NO	YES	NO	NO	NO	73	160	55	21.4846	136	79	3.64	1.42	2.22	1.11	4.14	5	307	67	34	23	35	4.6	3	0.8	0.8	29	20	33	22	0.63		0.84	34.78	62.34	4.8	133.032	6.84	88.0655	64.04
749	8.3192	0	male	Uygur	YES	NO	NO	YES	NO	NO	YES	NO	YES	NO	62	168	85	30.117	145	73	5.47	0.94	2.54	1.15	2.02	4.5	186.9	58.4	32	21	36	4.8	3	0.9	0.9	27	18	35	24	0.68	0.77	0.88	37.5	72.52	5.37	170.38	9.71	86.9331	67.45
750	8.3172	0	female	Han	NO	NO	NO	YES	YES	YES	NO	NO	NO	NO	66	165	64	23.5082	120	64	5.29	0.97	4.4	0.67	2.79	9.8	364.6	93.6	34	21	35	4.8	3.2	0.9	0.9	31	20	36	31	0.52	0.77	0.68	33.33	66.56	4.93	170.38	6.93	103.036	61.9
751	8.317	0	male	Han	NO	NO	NO	NO	NO	NO	NO	NO	NO	NO	29	168	62	21.9675	138	74	4.54	1.13	6.23	1.11	1.68	3.5	328	51	32	20	36	4.4	3	0.9	0.9	30	20	30	25	0.76	0.9	0.84	31.82	52.69	3.58	145.67	8.94	87.4631	60.09
752	8.3167	0	male	Kazak	NO	NO	NO	YES	NO	NO	NO	YES	NO	NO	45	176	77	24.8588	155	96	4.31	1.19	4.67	0.99	2.66	3.7	310.4	61.4	28	19	36	5.3	3.4	0.9	0.9	24	15	36	23	0.55	0.91	0.6	35.85	87.9	6.86	203.795	8	106.906	64.95
753	8.3147	0	male	Uygur	YES	NO	YES	YES	NO	YES	NO	NO	YES	NO	66	154	55	23.1915	147	87	4.23	1.21	3.26	0.89	3.69	5.4	246	52	33	22	37	4.9	3.2	1	0.9	29	19	36	25	0.99	0.84	1.18	34.69	71.85	4.74	191.054	9.9	128.181	63.69
754	8.314	0	female	Han	NO	NO	NO	NO	YES	NO	YES	NO	NO	NO	54	163	64	24.0889	169	104	4.65	1.1	3.96	1.54	3.76	4	253	48	29	19	33	4.9	3.3	0.9	0.9	28	19	34	20	0.56	0.7	0.8	32.65	68.68	5.63	176.839	2.03	106.491	60.88
755	8.3123	0	male	Han	NO	NO	YES	NO	NO	NO	YES	NO	NO	NO	51	182	100	30.1904	145	85	4.44	1.15	3.58	0.95	2.31	6	373	68	35	21	41	5.1	3.4	1.2	1.2	31	21	30	23	0.77	0.58	1.33	33.33	76.37	5.73	287.193	5.92	128.366	61.68
756	8.3082	0	male	Uygur	YES	YES	YES	NO	NO	NO	YES	NO	NO	NO	57	189	90	25.1954	124	73	5.41	0.94	3.5	1.03	3.4	6.2	262.8	83.2	42	24	41	5.1	3.2	1	1	30	20	36	26	0.94	0.78	1.21	37.25	82.85	6.3	220.67	7.83	102.542	66.92
757	8.3064	0	female	Han	NO	NO	NO	NO	NO	YES	YES	NO	NO	NO	46	175	70	22.8572	102	61	5.18	0.98	2.8	0.77	2.47	5	382.2	83.9	31	22	45	4.9	3.4	0.9	0.9	30	20	32	22	0.78	0.65	1.2	30.61	65.37	4.45	176.839	6	97.6685	57.95
758	8.3055	0	male	Han	YES	YES	NO	NO	NO	YES	NO	NO	NO	NO	53	164	68	25.2832	146	63	4.83	1.05	4.66	1.71	3.29	3.4	163	53	31	20	33	4.5	3	1	1	28	18	34	22	0.84	0.96	0.88	34.88	53.52	3.96	177.24	11.2	104.412	64.43
759	8.3044	0	female	Han	NO	NO	NO	NO	NO	NO	YES	YES	YES	NO	63	150	59	26.2223	164	72	4.33	1.17	3.05	1.26	2.3	5.7	225	56	30	17	32	4.6	3	0.8	0.8	22	12	28	19	0.59	0.97	0.61	34.78	62.34	4.86	133.032	5.9	87.6766	64.04
760	8.3009	0	female	Han	NO	NO	NO	NO	YES	NO	NO	NO	NO	NO	61	168	65	23.0301	123	91	4.39	1.15	5.47	1.19	2.14	7.8	491	138	34	19	32	4.2	2.8	0.8	0.8	31	19	33	23	0.69	0.5	1.38	33.33	49.03	3.53	112.265	5.75	66.6498	62.4
761	8.3004	0	male	Han	NO	NO	NO	NO	YES	NO	NO	NO	NO	NO	45	156	79	32.4624	132	74	4.17	1.21	4.54	1.16	2.83	6	258	56	31	20	34	4.7	3	0.9	0.9	27	20	35	23	0.62	0.79	0.76	36.17	67.36	5.32	164.034	5.9	90.6316	65.81
762	8.3	0	female	Han	NO	NO	NO	NO	YES	NO	YES	NO	NO	NO	57	163	63	23.7125	127	79	3.91	1.29	3.57	1.04	2.97	3.5	250.7	60.3	28	16	32	4.4	2.9	0.8	0.8	23	15	34	22	0.74	0.64	1.07	34.09	55.48	3.9	122.449	10	74.3104	63.27
763	8.2993	0	male	Han	NO	NO	NO	NO	YES	NO	YES	NO	NO	NO	38	160	60	23.4382	153	80	6.38	0.79	2.83	0.59	1.51	4.92	96.93	41.32	28	17	32	4.8	3.2	0.9	0.9	26	18	33	24	0.93	0.7	1.33	33.33	66.56	5.32	170.38	10.94	108.308	61.9
764	8.2945	0	male	Han	YES	YES	NO	NO	YES	YES	YES	NO	YES	NO	65	170	98	33.9108	129	60	4.56	1.1	4	0.99	2.27	6.8	283.7	62.9	37	20	40	4.9	3.2	1	0.9	28	19	35	24	0.89	1.01	0.88	34.69	71.85	5.17	191.054	10.47	90.5857	63.69
765	8.2917	0	male	Han	YES	YES	NO	NO	YES	NO	NO	NO	NO	NO	47	170	84	29.066	149	79	3.97	1.26	5.01	0.82	1.1	4.1	336	57	31	20	36	5	3.4	1	1	27	19	34	21	0.62	0.65	0.95	33.33	66.56	4.99	213.12	8.86	110.191	61.9
766	8.2883	0	male	Han	NO	NO	NO	NO	YES	NO	YES	NO	NO	NO	47	177	67	21.3865	108	57	4.84	1.03	5.19	1.1	1.82	2.9	308	60	31	17	32	4.4	2.9	0.9	0.8	25	18	34	25	0.56	0.79	0.71	34.09	55.48	3.61	133.869	6.59	75.0218	63.27
767	8.2881	0	male	Han	NO	NO	NO	NO	NO	NO	YES	NO	NO	NO	58	155	74	30.8017	132	72	4.26	1.17	4.49	1.2	1.63	6.1	266.8	60.3	31	18	30	4.6	3	0.8	0.8	26	19	34	21	0.75	0.62	1.21	34.78	62.34	4.36	133.032	6.25	76.4638	64.04
768	8.2864	0	male	Han	YES	NO	NO	NO	YES	NO	NO	NO	NO	NO	47	170	60	20.7622	88	48	5.35	0.93	3.42	1.5	3.09	5.4	192	72.5	30	18	30	5.1	3.4	0.8	0.8	25	16	33	18	0.85	0.52	1.63	33.33	76.37	5.58	161.236	8.1	97.5949	61.68
769	8.285	0	male	Han	YES	YES	NO	YES	NO	NO	NO	YES	YES	NO	50	170	80	27.6819	153	78	5.46	0.91	3.87	0.58	2.06	5	236.5	64.7	43	25	40	5.7	3.9	0.9	0.9	29	20	35	26	0.63	1.19	0.53	31.58	94.13	6.78	232.549	9	123.427	58.82
770	8.285	0	male	Kazak	YES	YES	NO	NO	NO	YES	NO	YES	YES	NO	42	158	59	23.6343	134	59	5.07	0.98	3.66	1.21	3.56	4.3	330	65	31	19	35	4.4	2.9	0.9	0.9	26	19	33	23	0.66	0.58	1.14	34.09	55.48	3.99	145.67	6.95	93.0143	63.27
771	8.2841	0	male	Han	YES	YES	NO	NO	YES	NO	NO	NO	NO	NO	34	158	62	24.8362	137	74	3.94	1.26	3.53	1.05	3.45	4.4	389	62	29	19	34	4.9	3.2	0.9	0.9	30	20	35	23	0.65	0.87	0.75	34.69	71.85	5.32	176.839	8.13	110.214	63.69
772	8.2823	0	male	Kazak	YES	NO	NO	YES	NO	YES	YES	NO	NO	YES	57	175	57	18.6127	139	74	3.26	1.52	3.25	0.78	3.08	5.4	268	58	28	18	29	4.4	2.8	1	0.9	25	17	31	23	1.02	1.16	0.88	36.36	58.14	5.17	157.858	10.2	96.0087	66.3
773	8.2812	0	female	Han	NO	NO	NO	YES	NO	NO	YES	NO	NO	NO	63	170	72	24.9142	168	77	5.5	0.9	3.9	0.96	2.79	1.22	365	73	39	20	36	6.1	4.2	1.4	1.4	28	18	35	25	0.56	0.99	0.57	32.2	103.21	7.22	483.508	6.59	271.009	59.59
774	8.2782	0	male	Uygur	YES	NO	NO	NO	YES	NO	YES	NO	YES	NO	68	168	66	23.385	120	72	4.7	1.05	4.88	1	3.03	3.3	265.1	56.3	35	22	32	4.2	2.8	0.9	0.9	27	18	33	23	0.93	0.8	1.16	33.33	46.03	3.38	133.988	9.9	78.9607	62.4
775	8.2777	0	male	Han	NO	YES	NO	NO	NO	NO	NO	NO	NO	NO	57	160	87	33.985	143	85	4.18	1.18	2.87	1.62	3.08	9	172.9	64.1	31	21	36	5	3.2	0.9	0.9	30	20	32	25	1.1	0.96	1.15	36	77.28	6.34	183.409	9.17	94.702	65.36
776	8.2769	0	male	Han	NO	NO	NO	YES	NO	NO	NO	YES	YES	NO	42	167	70	25.1004	155	85	4.88	1.01	4.06	1.22	3.81	6.9	272.9	86.8	32	19	37	4.8	3.2	1	1	28	18	35	24	0.51	0.75	0.68	33.33	66.56	4.46	198.394	6	112.609	61.9
777	8.2727	0	female	Han	NO	NO	NO	NO	NO	NO	YES	YES	YES	NO	60	175	80	26.1234	132	83	3.99	1.23	2.75	1.16	3.4	5.4	317.5	98	32	20	31	5.1	3.4	1.1	1.1	26	18	30	21	0.56	0.91	0.62	34.69	71.85	5.39	253.021	11.2	132.153	63.69
778	8.2699	0	male	Han	YES	YES	NO	NO	YES	NO	NO	NO	NO	NO	53	170	78	26.9906	109	66	4.49	1.09	3.06	0.68	3.08	6.2	234	67	37	23	36	5	3.3	0.9	0.9	28	19	37	24	0.67	0.88	0.76	34	74.11	5.56	183.409	7.88	97.4286	62.68
779	8.269	0	female	Uygur	NO	NO	NO	NO	NO	NO	NO	NO	NO	NO	64	157	85	34.4842	151	92	4.89	1	6.16	1.11	3.05	4.4	363.2	62.5	33	22	32	5	3.2	0.9	0.9	27	19	27	22	1.04	0.94	1.11	36	77.28	5.33	183.409	9.9	98.2216	65.36
780	8.269	0	female	Uygur	NO	NO	NO	NO	NO	NO	NO	NO	NO	NO	64	157	85	34.4849	151	92	4.89	1	4.02	1.11	5.87	4.4	363.2	62.5	33	22	32	5	3.2	0.9	0.9	27	19	27	22	1.04	0.94	1.11	36	77.28	5.33	183.409	9.9	96.8984	65.36
781	8.2678	0	male	Han	YES	YES	NO	YES	NO	NO	NO	NO	YES	NO	78	175	87	28.4082	208	124	4.4	1.11	9.23	0.91	4.68	5.86	350.75	87.62	35	23	36	5	3.4	1.1	1.1	26	20	34	26	0.81	1.06	0.76	33.33	66.56	4.99	244.578	12.46	122.161	61.9
782	8.2633	0	female	Uygur	NO	NO	NO	NO	NO	NO	NO	NO	NO	NO	23	165	76	27.9157	139	86	3.02	1.61	3.47	1.18	2.57	3.3	195	43	34	19	35	5	3.3	1.1	1.1	28	18	33	26	0.57	0.78	0.73	35.42	69.6	5.36	244.578	8.14	135.605	64.73
783	8.263	0	female	Kazak	YES	NO	NO	YES	NO	YES	NO	YES	YES	NO	69	167	71	25.4583	103	58	4.34	1.12	2.12	1.03	3.85	5.7	326	65	31	18	33	4.7	3.1	0.9	0.8	27	18	32	22	0.65	0.7	0.93	34.04	64.44	4.25	151.054	7.65	85.1199	62.95
784	8.2608	0	male	Han	YES	NO	YES	YES	NO	NO	YES	YES	NO	YES	60	160	63	24.6099	126	61	3.88	1.25	4.05	1.07	2.31	4.9	361	77	37	23	37	4.7	3.1	0.9	0.9	29	18	34	25	0.42	0.74	0.57	34.04	64.44	4.38	164.034	8.14	101.847	62.95
785	8.2552	0	male	Han	NO	NO	NO	YES	NO	YES	NO	YES	NO	NO	60	167	64	22.9489	126	75	5.3	0.91	2.03	1	2.94	7.6	357.4	68.5	34	20	40	5.2	3.2	0.9	0.9	31	17	37	24	0.65	0.59	1.1	38.46	88.55	5.14	196.888	5.2	116.847	68.37
786	8.254	0	male	Uygur	YES	NO	NO	YES	NO	YES	NO	NO	YES	NO	56	160	56	21.876	144	76	4.46	1.08	2.71	1.28	4.03	4.2	312.9	69.3	35	20	30	4.4	2.8	1.2	1.2	26	17	32	22	0.5	0.82	0.61	36.36	58.14	4.53	224.818	4.76	145.995	66.3
787	8.2524	0	male	Han	NO	YES	NO	NO	NO	NO	NO	NO	NO	NO	28	172	83	28.0567	123	60	3.91	1.23	4.08	1.12	1.31	4.73	294.74	65.78	34	21	40	5.1	3.4	1.1	1.1	30	20	36	23	0.52	0.77	0.68	34.69	71.85	5.1	253.021	6.12	130.841	63.69
788	8.2502	0	male	Other	YES	YES	YES	YES	NO	YES	YES	YES	NO	NO	66	161	66	25.4623	102	62	3.87	1.24	5.75	1	3.33	4.37	387.98	63.49	32	20	30	4.2	2.7	0.8	0.8	28	20	33	22	0.52	0.85	0.61	35.71	51.56	4.02	112.265	7.43	67.8666	65.61
789	8.2502	0	male	Han	NO	NO	NO	YES	NO	NO	YES	NO	NO	NO	43	160	63	24.6099	144	65	5.58	0.86	4.94	1.32	2.71	3.8	286.1	86				4.7	3.1	0.9	0.8					0.84	0.71	1.18	34.04	64.44	4.58	151.054	2.03	92.6995	62.95
790	8.2495	0	male	Han	NO	NO	NO	NO	YES	NO	NO	NO	NO	NO	37	180	80	24.6918	191	81	4.32	1.11	2.92	0.64	2.44	4.7	440.5	98.9	33	20	38	5	3.3	1.1	1	28	19	35	23	0.65	0.85	0.76	34	74.11	4.59	228.627	7.22	116.108	62.68
791	8.248	0	male	Han	YES	YES	NO	NO	YES	NO	NO	NO	NO	NO	39	160	63	24.6101	117	89	4.2	1.14	3.79	0.98	2.62	4.5	279.8	65.6	30	16	29	4.3	2.8	1	1	22	16	30	23	0.78	0.61	1.28	36.59	49.61	3.52	163.762	6.5	101.677	66.84
792	8.2436	0	male	Han	YES	YES	NO	NO	YES	NO	YES	NO	NO	NO	44	170	69	23.8755	124	65	4.54	1.05	2.41	0.91	1.6	5.5	342	69				5	3.3	0.9	0.9					0.71	0.51	0.39	34	74.11	5.26	183.409	5.92	103.779	62.68
793	8.2391	0	male	Uygur	NO	NO	NO	NO	YES	YES	YES	NO	NO	NO	35	180	78	24.0747	174	87	4.52	1.05	4.68	1.39	3.98	4.9	250.4	62.5	38	21	32	4.8	3.2	0.9	0.9	26	21	33	23	0.67	0.57	1.18	33.33	66.56	5.26	170.38	5.83	87.6667	61.9
794	8.2368	1	male	Uygur	YES	NO	NO	NO	NO	NO	NO	NO	NO	NO	59	170	73	25.26	149	85	4.19	1.13	5.05	0.83	2.78	5.6	255.1	80.8	33	23	33	5.6	4.1	1.2	1.2	26	16	35	23	0.52	0.7	0.74	28.3	73.39	5.36	336.239	7.93	187.153	65.9
795	8.2311	0	female	Uygur	NO	NO	NO	NO	NO	YES	NO	YES	YES	NO	78	166	74	26.8552	102	62	4.4	1.07	3.88	0.9	1.75	6.3	280.8	85.7	35	20	32	5.2	3.7	0.9	0.9	29	20	36	24	0.99	0.86	1.15	28.85	71.38	5.57	196.888	10.42	110.32	55.12
796	8.2311	0	female	Uygur	NO	NO	NO	NO	NO	YES	NO	YES	YES	NO	78	166	74	26.8551	102	62	4.4	1.07	3.65	0.9	2.73	6.3	280.8	85.7	35	20	32	5.2	3.7	0.9	0.9	29	20	36	24	0.99	0.86	1.15	28.85	71.38	5.57	196.888	10.42	108.964	55.12
797	8.2287	0	male	Han	NO	NO	NO	NO	NO	NO	NO	NO	NO	NO	62	169	70	24.509	171	90	4.56	1.03	4.4	1.21	4.59	11.4	392	79	32	24	37	4.9	3.2	1.1	1	23	16	37	23	1.04	0.78	1.33	34.69	71.85	5.46	220.765	8.67	124.445	63.69
798	8.2201	0	male	Han	NO	NO	NO	NO	NO	NO	NO	NO	NO	NO	41	174	83	27.4148	139	97	5.61	0.83	4.44	0.98	4.06	8.4	318	110	34	23	37	5	3.4	0.9	0.9	29	19	31	23	0.4	0.82	0.49	32	71	4.74	183.409	10	93.0586	60
799	8.2199	0	male	Han	NO	NO	NO	NO	NO	YES	NO	YES	YES	NO	53	176	80	25.8267	110	69	4.52	1.03	4.09	0.78	1.81	6.3	269.8	64.4	35		36	5	3.3	0.9	0.9	30	20	35	23	0.59	0.87	0.68	34	74.11	5.26	183.409	7.87	94.3124	62.68
800	8.2185	0	male	Han	YES	NO	NO	NO	YES	NO	NO	NO	NO	NO	39	170	77	26.6443	173	111	4.47	1.04	2.74	1.49	2.9	2.9	321.8	71.6	36	20	33	4.8	3.1	1	1	27	19	34	25	0.74	0.67	1.1	35.42	69.6	5.15	198.394	7.22	106.11	64.73
801	8.2172	0	female	Han	NO	NO	NO	NO	YES	YES	NO	NO	NO	NO	62	170	70	24.2221	121	79	4.38	1.06	4.01	0.91	1.44	6.5	287.3	94.7	35	21	34	5	3.3	0.9	0.9	30	20	34	21	0.52	0.8	0.65	34	74.11	4.82	183.409	6.5	103.033	62.68
802	8.2151	0	male	Kazak	NO	NO	YES	YES	NO	NO	YES	YES	YES	NO	45	160	59	23.0474	128	67	4.33	1.07	5.66	1.08	1.71	4.8	262	50	30	19	30	4.8	3.5	0.9	0.9	24	17	34	23	0.83	0.92	0.9	27.08	56.65	4.31	170.38	9.76	109.176	52.69
803	8.214	0	male	Han	YES	YES	NO	NO	YES	YES	NO	YES	NO	NO	42	170	73	25.2603	136	83	4.45	1.04	3.88	1.16	2.21	4.5	315	52				4.3	2.9	1.2	1.2					0.63	0.9	0.7	32.56	50.86	3.92	216.506	11.2	119.058	61.23
804	8.2124	0	female	Uygur	NO	NO	YES	YES	NO	YES	NO	NO	YES	NO	54	182	123	37.1332	163	90	3.04	1.52	5.42	0.76	2.75	87	449	87	30	20	37	5.4	3.6	0.9	0.9	29	19	31	26	1.13	0.54	2.09	33.33	86.88	6.95	210.815	14.44	84.5019	61.48
805	8.2099	0	female	Han	NO	NO	NO	NO	NO	NO	YES	NO	NO	NO	50	172	71	23.9999	142	79	3.34	1.38	4.03	0.82	2.31	5.8	347	66	29	19	32	4.5	3	0.9	0.9	28	19	29	19	0.48	0.65	0.74	33.33	57.45	3.62	151.679	5.65	85.0313	62.14
806	8.2076	0	female	Uygur	NO	NO	YES	NO	NO	YES	NO	YES	YES	NO	77	160	60	23.4377	130	78	5.41	0.85	3.58	1.13	2.02	6.2	317	50				4.9	3	0.8	0.8					0.97	1	0.97	38.78	77.81	5.45	149.655	9.88	94.0576	68.97
807	8.202	0	male	Uygur	YES	YES	NO	NO	NO	YES	NO	NO	YES	NO	58	183	80	23.8885	164	101	14.29	0.32	4.7	0.6	2.02	3.83	169.75	45.54	33	21	35	5.4	3.8	0.9	0.9	26	18	33	22	0.85	0.65	1.31	29.63	79.36	5.16	210.815	7.04	107.373	56.16
808	8.1976	0	male	Other	NO	NO	NO	NO	YES	YES	NO	NO	NO	NO	53	165	52	19.1002	100	60	8.59	0.53	4.13	1.27	1.24	4.83	202.37	71.64	32	15	34	4.7	3.1	0.9	0.9	26	16	28	23	0.65	0.95	0.68	34.04	64.44	4.96	164.034	8.67	109.094	62.95
809	8.1939	0	male	Han	NO	YES	NO	NO	YES	NO	NO	YES	NO	NO	51	170	106	36.6783	128	57	5.04	0.9	3.09	0.86	1.31	7.6	381	84	31	19	40	4.7	3.2	1	1	34	21	33	24	0.6	1.07	0.56	31.91	61.4	5.34	191.218	8	86.5591	59.98
810	8.1938	0	female	Han	NO	NO	NO	NO	NO	YES	NO	NO	NO	NO	70	180	90	27.7782	141	81	3.91	1.16	3.34	0.87	2.27	5.4	315	85	39	23	36	5.3	3.4	1.2	1.1	30	20	35	26	0.65	0.85	0.76	37.25	82.85	6.38	288.103	7.56	139.173	66.29
811	8.1912	0	male	Han	YES	YES	NO	NO	YES	YES	NO	NO	NO	NO	65	170	92	31.8348	145	65	3.48	1.3	2.65	0.82	3.27	8.6	348.4	81.2	33	21	34	5	3.3	1	1	30	19	35	25	0.8	0.71	1.13	34	74.11	5.56	213.12	6.4	103.371	62.68
812	8.1907	1	female	Han	NO	NO	NO	YES	YES	NO	NO	YES	YES	YES	65	160	62	24.2188	113	64	4.39	1.03	3.49	1.35	2.85	6.2	279	64	35	15	43	4.4	2.8	0.9	0.9	22	17	36	24	1.15	1.09	1.06	36.36	58.14	5.06	145.67	15.38	91.1518	66.3
813	8.1891	0	female	Other	NO	NO	NO	NO	YES	YES	NO	NO	NO	NO	50	175	70	22.8575	209	65	4.56	0.99	4.32	0.94	3.22	5	376.3	73.2	35	22	38	5	3.5	0.9	0.9	28	19	35	22	0.89	0.75	1.19	30	67.37	4.78	183.409	8.4	101.297	56.98
814	8.187	1	male	Uygur	YES	YES	YES	YES	NO	YES	NO	YES	YES	NO	44	187	128	36.6039	109	71	4.21	1.07	5.19	0.82	4.29	5.1	319.5	61.3	42	24	44	6.2	4.8	1.2	1.2	30	19	33	23	0.52	0.63	0.83	23.73	80.76	6.14	400.037	9	154.586	64.73
815	8.1869	0	female	Han	NO	NO	NO	YES	NO	NO	NO	NO	YES	NO	69	178	85	26.8283	183	88	3.85	1.17	5.13	1.12	2.86	4.6	259	66	36	18	37	5.1	3.4	1	1	31	19	32	22	0.59	0.66	0.89	33.3	76.37	5.88	220.67	2.03	109.194	61.68
816	8.1855	0	female	Han	NO	NO	NO	NO	YES	YES	YES	NO	NO	NO	57	158	43	17.2249	122	77	4.41	1.02	3.11	1.27	3.39	4.6	196	38				4.2	3	1	1					0.58	0.79	0.73	28.57	43.58	2.79	157.21	7.43	115.485	55.46
817	8.1846	0	female	Uygur	NO	NO	YES	YES	NO	NO	YES	NO	NO	NO	71	173	76	25.3939	143	76	4.2	1.07	3.38	1.05	3.23	4.69	379.5	92.59	44	25	35	5.3	3.5	1.1	1.1	30	20	35	23	0.91	0.66	1.38	33.96	84.47	6.5	270.318	7.19	144.154	62.41
818	8.182	0	female	Uygur	NO	NO	NO	NO	YES	YES	NO	NO	NO	NO	65	157	63	25.5596	141	82	4.82	0.93	4.23	1.12	1.64	4.9	244	32	31	19	28	4.6	3	0.9	0.9	26	18	30	21	0.87	1.08	0.81	34.78	62.34	4.61	157.8	1.81	97.9396	64.04
819	8.1819	0	male	Han	YES	YES	YES	NO	YES	YES	YES	NO	NO	NO	59	162	50	19.0528	145	95	4.15	1.08	4.17	0.92	1.78	4.5	340	86	30	20	30	4.3	2.7	0.9	0.9	29	18	31	23	0.74	1.03	0.72	37.21	56.05	3.87	139.773	9.87	94.7421	67.47
820	8.1757	0	male	Uygur	YES	NO	NO	NO	NO	NO	NO	NO	NO	NO	59	158	53	21.2306	123	78	4.64	0.96	7.13	1.31	2.03	5.1	378.5	72.9	32	20	34	4.6	3	0.9	0.9	28	19	35	24	1.04	0.78	1.33	34.78	62.34	4.8	157.8	7.17	105.956	64.04
821	8.1729	0	female	Han	NO	NO	NO	NO	YES	YES	NO	NO	NO	NO	39	162	64	24.3873	155	101	3.47	1.28	3.62	1.25	2.71	4.2	210	56	34	25	33	4.7	3	0.9	0.9	25	17	31	22	0.52	0.85	0.61	36.17	67.36	4.72	164.034	6.12	99.1442	65.81
822	8.1669	0	female	Uygur	NO	NO	NO	NO	YES	YES	NO	NO	NO	NO	63	175	68	22.2042	153	91	4.46	0.99	4.3	0.98	1.92	5.2	282	83	34	21	35	5	3.1	0.9	0.9	30	20	35	23	0.68	0.78	0.87	38	80.32	5.62	183.409	7.56	102.75	67.93
823	8.1607	0	male	Uygur	YES	NO	NO	NO	YES	NO	NO	NO	NO	NO	61	154	35	14.7582	135	73	4.26	1.03	4.93	1.07	2.22	5.9	232.1	70.9	32	20	48	4.2	2.6	0.8	0.8	24	20	53	29	0.86			38.1	53.97	3.35	112.265	8.4	90.9396	68.68
824	8.1605	0	male	Uygur	YES	YES	YES	YES	NO	YES	NO	YES	YES	NO	37	162	58	22.1011	136	88	4.1	1.07	5.91	0.97	1.63	2.2	189	49				4.6	3	0.9	0.9					0.73	0.61	1.2	34.78	62.34	4.24	157.8	6.93	100.019	64.04
825	8.1489	0	female	Uygur	NO	NO	YES	YES	NO	NO	NO	YES	YES	NO	56	162	80	30.4837	118	67	5.86	0.74	4.7	1.3	2.55	7	416.7	58.4	40	22	38	5	3.3	1.2	1.2	29	20	33	22	0.79	1.03	0.77	34	74.11	5.26	277.833	10.53	149.429	62.68
826	8.1418	0	male	Han	NO	NO	YES	YES	YES	NO	NO	NO	NO	NO	53	169	71	24.8596	133	89	4.63	0.93	4.49	1.09	2.04	3.5	226.4	60.4				4.7	3	0.9	0.9					0.52	0.88	0.59	36.17	67.37	4.38	164.034	7.65	91.8033	65.81
827	8.1411	0	female	Uygur	NO	NO	YES	NO	YES	YES	YES	NO	NO	NO	72	175	90	29.3882	163	113	4.26	1.01	3.43	0.9	2.8	5.3	271	72	31	19	34	4.9	3.1	1	1	26	17	35	23	0.78	0.63	1.24	36.73	74.89	5.47	205.694	6.24	99.5328	66.39
828	8.1395	0	female	Han	NO	NO	NO	NO	YES	NO	NO	NO	NO	NO	33	155	68	28.3045	127	67	4.57	0.94	3.1	0.98	2.14	4.8	279.8	79.8	31	19	32	4.5	3	0.9	0.9	29	20	34	23	0.9	0.98	0.92	33.33	57.45	5.06	151.679	10.53	92.3407	62.14
829	8.1321	0	male	Han	NO	NO	NO	NO	YES	NO	YES	YES	NO	NO	35	175	85	27.7556	112	65	4.1	1.04	5.12	0.92	2.93	10.5	437	123	35	18	37	4.9	3.3	0.9	0.9	30	20	35	23	0.65	0.88	0.74	32.65	68.68	4.81	176.839	7.65	89.4434	60.88
830	8.1287	0	male	Han	YES	YES	YES	NO	NO	NO	YES	NO	NO	NO	61	178	80	25.2501	138	81	5.12	0.83	2.92	1.12	3.69	5.24	429.32	82.49	34	20	33	4.7	3.2	0.9	0.9	28	19	34	23	0.56	0.98	0.57	31.91	61.4	4.85	164.034	6.59	84.8642	59.98
831	8.124	0	male	Han	NO	YES	NO	NO	NO	YES	NO	NO	NO	NO	75	157	50	20.285	117	70	4.7	0.9	4.58	1.22	2.79	4.8	284	57	30	18	34	4.7	3.1	0.9	0.8	27	17	34	25	1.02	1.23	0.83	34.04	64.44	4.64	151.054	14.57	104.55	62.95
832	8.1164	0	male	Han	YES	YES	NO	YES	YES	NO	YES	YES	YES	NO	55	169	56	19.6078	137	73	3.96	1.06	3.87	1.1	1.49	6.9	253	48	36	20	37	5.3	3.5	0.9	0.9	30	20	36	23	0.74	0.9	0.82	33.96	84.47	6	203.795	9.87	127.787	62.41
833	8.114	0	male	Han	NO	NO	YES	NO	YES	NO	NO	NO	NO	NO	50	153	57	24.3504	108	107	4.23	0.99	3.56	0.97	1.92	6.4	310	75	27	16	38	4.5	3.1	0.9	0.9	25	17	36	25	0.81		1.19	31.11	54.53	3.65	151.679	8.13	101.6	58.98
834	8.1134	0	male	Uygur	YES	NO	NO	NO	NO	NO	YES	NO	YES	YES	65	157	53	21.5022	137	66	4.5	0.93	3.93	1.29	2.8	4.3	359.5	72.8	30	19	38	4.8	3.4	0.9	0.9	28	18	35	24	1.2	0.96	1.25	29.17	60.08	5.17	170.38	11.09	116.118	55.88
835	8.1134	0	male	Uygur	YES	NO	NO	NO	NO	NO	YES	NO	YES	YES	65	157	53	21.5024	137	66	4.5	0.93	3.79	1.29	3.17	4.3	359.5	72.8	30	19	38	4.8	3.4	0.9	0.9	28	18	35	24	1.2	0.96	1.25	29.17	60.08	5.17	170.38	8.4	114.873	55.88
836	8.1083	0	female	Han	NO	NO	NO	NO	YES	NO	NO	NO	NO	NO	33	169	59	20.6579	125	79	3.82	1.09	3.86	0.88	0.65	6.7	279	62	30	18	36	4.9	3.2	0.9	0.9	29	20	37	23	0.67	0.77	0.87	34.69	71.85	5.39	176.839	9.57	108.277	63.69
837	8.1077	0	female	Han	NO	NO	NO	NO	NO	NO	NO	NO	NO	NO	44	160	64	25.0003	132	79	4.29	0.97	4.81	1.15	1.45	3.1	257.6	71.3				4.2	2.7	1	0.9					0.84	1.07	0.79	35.71	51.56	4.95	145.409	2.03	88.5397	65.61
838	8.107	0	female	Han	NO	NO	NO	NO	YES	NO	YES	YES	NO	NO	69	156	70	28.7649	115	60	4.78	0.87	3.66	0.83	1.12	5.8	328	46	36	19	47	4.7	3.1	0.8	0.8	30	21	47	23	0.67		0.69	34.04	64.44	4.58	138.473	9.57	82.7346	62.95
839	8.107	0	male	Han	NO	NO	NO	NO	NO	NO	NO	NO	NO	NO	45	168	78	27.6362	107	64	4.78	0.87	2.77	0.94	1.08	5.3	272	58	31	21	38	5.2	3.4	1	1	32	20	34	26	1.02	0.85	1.2	36	77.28	5.8	228.346	7.56	123.637	65.36
840	8.107	0	female	Han	NO	NO	NO	NO	YES	NO	NO	YES	YES	NO	69	156	70	28.7649	115	60	4.78	0.87	3.61	0.83	1.81	5.8	328	46	36	19	47	4.7	3.1	0.8	0.8	30	21	47	23	0.67			34.04	64.44	4.58	138.473	9.57	81.7094	62.95
841	8.1048	0	male	Uygur	YES	YES	YES	YES	NO	NO	NO	NO	NO	NO	54	158	67	26.8395	146	94	4.51	0.92	3.3	0.8	3.58	3.3	270	46	33	18	32	4.8	3.2	1	0.9	26	17	34	20	0.63	0.64	0.98	33.33	66.56	5.59	184.178	7	110.385	61.9
842	8.1041	0	male	Han	YES	NO	NO	NO	NO	NO	NO	NO	YES	NO	57	168	56	19.8419	144	90	2.92	1.42	4.2	1.32	1.71	5.9	368.2	88.4	30	20	31	4.9	3.2	0.9	0.9	30	20	28	20	0.79	0.65	1.22	34.69	71.85	5.32	176.839	8.78	111.31	63.69
843	8.1028	0	male	Han	YES	YES	NO	YES	NO	YES	NO	NO	YES	NO	68	169	68	23.809	186	112	4.76	0.87	3.06	1.26	2.27	6	423	106	30	20	30	5	3.3	1.1	1	30	20	32	20	0.74	1	0.74	34	74.11	5.04	228.627	8.22	130.764	62.68
844	8.0983	0	male	Han	YES	NO	NO	YES	YES	NO	YES	NO	NO	NO	43	180	84	25.926	146	72	4.53	0.91	5.98	0.96	2.39	7.1	274	74	36	18	37	4.9	3.2	1	1	30	20	36	23	0.65	0.78	0.83	34.69	71.85	5.6	205.694	7.65	101.814	63.69
845	8.0949	0	male	Han	YES	NO	NO	NO	YES	NO	NO	NO	NO	NO	47	170	60	20.7615	88	48	4.95	0.83	4.13	1.5	1.38	5.4	192	72.5	30	18	30	5.1	3.4	0.8	0.8	25	16	33	18	0.85	0.52	1.63	33.33	76.37	5.58	161.236	8.1	98.6699	61.68
846	8.0947	0	male	Han	YES	YES	NO	NO	NO	NO	YES	NO	NO	NO	33	175	76	24.8169	121	65	4.89	0.84	3.06	0.97	2.27	4.7	300.1	65.3	33	22	42	4.5	3	0.9	0.9	26	17	36	22	0.89	0.75	1.19	33.33	57.45	4.08	151.679	8.48	80.3639	62.14
847	8.0934	0	male	Uygur	YES	YES	YES	NO	YES	NO	NO	NO	NO	NO	40	164	78	29.0007	112	72	4.77	0.86	5.87	1.69	3.3	5.5	202.8	53.8	33	20	38	4.8	3.1	0.9	0.9	28	18	37	23	0.97	0.8	1.21	35.42	69.6	4.32	170.38	8.82	92.3019	64.73
848	8.0863	0	female	Uygur	NO	NO	NO	NO	NO	NO	NO	NO	NO	NO	46	165	67	24.6105	135	95	4.38	0.93	3.85	1.27	1.31	6.6	441	83				4.6	3	1	1					0.67	0.8	0.84	34.78	62.34	3.99	184.166	5.75	107.624	64.04
849	8.0846	0	male	Other	YES	YES	NO	NO	NO	NO	NO	NO	NO	NO	39	180	78	24.0749	118	68	3.91	1.04	3.78	1.15	4.36	7.9	376.5	100.3	34	21	42	5.1	3.3	1	1	27	19	37	22	0.56	0.7	0.8	35.29	79.68		220.67	9.33	113.543	64.36
850	8.083	0	male	Han	NO	NO	NO	YES	NO	NO	NO	NO	YES	NO	65	162	101	38.4852	146	88	3.5	1.16	4.56	0.87	3.51	8	595	76	33	22	32	4.8	3.1	0.9	0.9	27	18	35	24	0.85	0.81	1.05	35.42	69.6	5.5	170.38	8.67	81.2185	64.73
851	8.083	0	male	Han	NO	NO	NO	YES	NO	YES	NO	NO	YES	NO	65	162	101	38.4852	146	88	3.5	1.16	2.49	0.87	1.85	8	595	76	33	22	32	4.8	3.1	0.9	0.9	27	18	35	24	0.85	0.81	1.05	35.42	69.6	5.5	170.38	8.13	80.0621	64.73
852	8.0817	0	female	Han	NO	NO	NO	NO	YES	YES	NO	NO	NO	NO	50	159	72	28.4802	110	59	4.77	0.85	2.81	0.85	2.7	5.9	270	38	28	20	27	4.9	3.1	0.9	0.9	28	20	33	25	0.85	0.55	1.55	36.73	74.89	5.47	176.839	7.39	101.713	66.39
853	8.0804	0	male	Han	YES	YES	NO	YES	YES	NO	YES	YES	NO	NO	34	180	97	29.9385	170	84	3.82	1.06	2.55	1.07	2.08	5.3	355	59	43	27	39	5.2	3.5	1.2	1.2	32	20	37	25	0.84	0.64	1.31	32.69	78.64	5.58	296.703	8	135.685	60.72
854	8.0785	0	female	Uygur	NO	NO	NO	NO	YES	NO	YES	NO	NO	NO	59	169	71	24.8595	157	102	4.21	0.96	2.69	1.1	2.96	5.1	310	63				4.8	3.2	0.9	0.9					0.69	0.8	0.86	33.33	66.56	4.93	170.38	2.03	95.3549	61.9
855	8.0766	0	male	Han	NO	NO	NO	NO	YES	NO	NO	NO	NO	NO	48	172	86	29.0702	154	88	3.77	1.07	4.94	1.2	1.6	3.8	339.2	75.5	35	20	36	5.1	3.4	0.9	0.9	31	21	35	25	0.53	0.75	0.71	33.33	76.37	6.42	190.092	10.6	95.1842	61.68
856	8.0733	0	female	Han	NO	NO	NO	NO	YES	NO	NO	NO	YES	NO	57	163	71	26.7236	141	70	4.73	0.85	3.11	1.34	2.12	5.6	369.9	58.8	32	21	33	5.1	3.6	1.1	1.1	24	15	32	20	0.73	0.86	0.85	30.61	65.37	4.38	253.021	5.72	146.348	57.95
857	8.0727	0	male	Uygur	YES	YES	NO	NO	NO	YES	YES	NO	NO	NO	46	174	83	27.4153	160	80	5.43	0.74	4.49	1.17	3.03	6	349	76	30	18	33	4.6	3	1	1	27	17	32	24	0.64	1.02	0.63	34.78	62.34	4.3	184.166	9.14	93.4428	64.04
858	8.0724	1	male	Uygur	YES	YES	NO	NO	YES	NO	YES	NO	NO	NO	63	168	75	26.574	183	100	3.09	1.3	2.87	1.06	3.45	2.3	433	53	30	21	33	4.7	3.3	1.6	1.5	23	16	27	24	0.61	0.89	0.69	31.11	54.53	5.4	371.958	9.5	205.57	58.98
859	8.069	0	male	Uygur	NO	NO	NO	NO	YES	NO	YES	NO	YES	NO	66	170	73	25.2596	138	91	4.71	0.85	5.17	1.02	2.9	5.8	432	81				4.1	3.9	0.9	0.9					0.84	0.47	1.79	26.83	39.22	4.31	128.316	10	70.5616	52
860	8.0675	0	male	Han	YES	YES	NO	YES	NO	YES	YES	YES	YES	NO	78	172	73	24.6759	180	100	5.06	0.79	3.98	0.96	1.85	4.1	296.2	80.2	32	21	33	5.2	3.5	1.1	1.1	30	20	34	23	0.52	0.77	0.68	34	74.11	4.82	261.601	6.93	144.627	62.68
861	8.0675	0	male	Han	YES	YES	NO	YES	NO	YES	YES	YES	YES	NO	78	172	73	24.6759	180	100	5.06	0.79	3	0.96	2.49	4.1	296.2	80.2	32	21	33	5	3.3	0.9	0.9	30	20	34	23	0.52	0.77	0.68	34	74.11	4.82	183.409	6.93	100.185	62.68
862	8.0656	0	female	Kazak	NO	NO	NO	YES	NO	YES	NO	NO	YES	NO	68	175	73	23.8377	186	62	4.2	0.95	5.09	1.22	3.05	5	414	76	42	21	35	6.6	4.4	1.2	1.2	27	18	33	22	0.64	0.49	0.31	34.38	129.94	9.23	445.564	6.47	243.864	62.32
863	8.0656	0	male	Han	YES	YES	NO	NO	YES	NO	YES	NO	NO	YES	43	160	75	29.2976	127	72	3.99	1	3.86	1.51	2.17	4.3	203	67				5.1	3.3	0.9	0.9					0.75	0.88	0.85	35.29	79.68	7.09	190.092	9.88	106.608	64.36
864	8.0581	0	male	Uygur	YES	NO	YES	YES	NO	YES	NO	YES	YES	NO	53	177	80	25.5363	168	102	4.4	0.9	3.72	1.07	1.9	3.7	400	77	31	19	29	5.2	3.3	1	1	25	19	35	21	0.64	0.87	0.74	36.54	95.38	7.43	228.346	9.88	117.052	65.93
865	8.0543	0	male	Han	YES	NO	NO	NO	YES	NO	NO	NO	NO	NO	55	162	75	28.5781	109	75	3.83	1.03	3.19	0.74	1.99	5.9	229	57	31	21	31	4.4	2.9	0.9	0.9	28	19	33	20	0.89	0.53	1.68	34.09	55.48	3.88	145.67	5.93	81.1395	63.27
866	8.0446	0	female	Han	NO	NO	NO	NO	YES	NO	YES	NO	NO	NO	56	175	79	25.7965	152	73	4.39	0.89	3.47	1.22	2.04	4.8	173	46	26	18	36	4.8	3.1	1	0.9	31	20	34	22	0.86	0.62	1.39	35.42	69.6	4.73	184.178	7.82	95.6371	64.73
867	8.0351	0	male	Han	NO	NO	NO	NO	YES	YES	YES	NO	NO	NO	38	165	72	26.4464	123	65	4.5	0.86	2.68	1.26	3.11	4.1	346	92	33	22	34	5.3	3.4	0.8	0.8	28	18	29	20	0.72	0.91	0.79	35.85	87.9	6.96	173.217	5.92	97.5762	64.95
868	8.034	0	male	Han	NO	NO	YES	NO	YES	YES	NO	NO	YES	NO	54	168	70	24.8021	143	88	6.04	0.64	2.86	1.56	4.32	4.4	290	72.5	32	20	34	4.9	3.1	1	1	29	20	33	21	0.64	0.74	0.86	36.73	74.89	5.84	205.694	6.59	116.35	66.39
869	8.0314	0	male	Uygur	YES	YES	NO	NO	NO	YES	YES	NO	NO	NO	47	167	75	26.8925	144	97	4.76	0.81	2.51	0.83	0.77	4.5	272.2	77.5	31	18	38	5.1	3.5	0.9	0.9	25	19	35	23	0.84	0.94	0.89	31	73	5.84	190.092	9.33	104.115	59
870	8.0276	0	male	Han	YES	NO	YES	YES	NO	YES	NO	YES	NO	NO	64	160	60	23.4382	130	66	4.13	0.93	3.34	1.37	2.04	5.74	280.83	50.59	31	20	35	4.7	3.3	0.9	0.9	26	18	30	20	0.66	0.85	0.78	29.79	58.23	4.13	164.034	10	103.095	56.89
871	8.0224	0	female	Han	NO	NO	NO	NO	YES	YES	YES	NO	YES	NO	84	163	65	24.465	123	63	4.66	0.82	2.29	1.27	2.23	5.8	331.6	58.7	35	22	32	4.8	3.2	0.9	0.9	26	17	30	22	1.08	0.79	1.37	33.33	66.56	4.73	170.38	10.29	101.817	61.9
872	8.0217	0	male	Han	YES	NO	NO	NO	YES	NO	YES	YES	NO	NO	70	145	55	26.1599	119	78	4.44	0.86	5.17	0.91	2.02	7.7	213.9	60.3	26	17	35	4.5	2.9	0.9	0.9	30	20	33	21	0.49	0.79	0.62	35.56	60.24	4.04	151.679	6.53	105.655	65.16
873	8.0216	0	male	Han	YES	NO	NO	YES	YES	NO	YES	YES	NO	NO	70	147	42	19.4373	136	88	4.6	0.83	2.99	1.28	2.49	3.7	184.1	62.2	29	19	28	4.1	2.6	0.8	0.8	26	17	27	20	0.96	0.84	0.14	36.59	49.61	3.77	107.323	6.33	83.7544	66.84
874	8.0149	0	female	Uygur	NO	NO	NO	NO	NO	YES	NO	NO	NO	NO	67	169	75	26.2602	118	84	4.41	0.86	2.81	1.23	3.62	4	275.8	82.3				4.9	3.2	0.9	0.9					0.81	0.74	1.09	34.69	71.85	6.04	176.839	6.33	96.2125	63.69
875	8.0105	0	male	Other	NO	NO	NO	YES	NO	NO	NO	YES	YES	NO	70	164	70	26.0266	160	88	4.72	0.8	3.36	1.44	3.42	5.5	209	65	38	20	35	4.8	3.1	1	1	30	18	33	21	0.84	0.86	0.98	36.96	65.13	4.95	198.394	9.39	115.178	66.91
876	8.0105	0	male	Other	NO	NO	NO	YES	NO	NO	NO	YES	YES	NO	70	164	70	26.0266	160	88	4.72	0.8	4.11	1.44	2.91	5.5	209	65	38	20	35	4.6	2.9	0.8	0.8	30	18	33	21	0.84	0.86	0.98	36.96	65.13	4.95	133.032	10	76.3015	66.91
877	8.0088	0	male	Han	NO	YES	YES	NO	NO	NO	NO	NO	NO	NO	52	156	59	24.2443	121	68	4.01	0.94	2.96	1.59	2.69	4.1	242.8	60.6	28	17	29	4.4	2.9	0.9	0.9	26	17	27	19	0.88	0.73	1.21	34.09	55.48	4.05	145.67	7.19	93.7446	63.27
878	8.0041	0	male	Han	YES	YES	NO	NO	YES	NO	YES	YES	NO	NO	58	175	63	20.5719	145	76	4.69	0.8	2.77	0.97	3.94	3.1	217	44	32	21	32	4.5	3	1.3	1.2	28	17	33	23	0.79	0.57	1.39	33.33	57.45	4.19	248.35	8.32	144.306	62.14
879	8.0004	0	male	Uygur	YES	YES	NO	YES	YES	NO	YES	YES	YES	NO	53	174	74	24.4425	125	66	4.2	0.89	3.09	1.03	2.78	4.7	217	42	32	19	32	4.7	3	1.1	1.1	27	19	33	23	0.89	0.73	1.22	37.78	62.9	4.47	220.073	7.74	179.872	68.04
880	7.9931	0	male	Han	NO	NO	NO	NO	YES	NO	NO	NO	NO	NO	44	156	52	21.3676	140	95	3.99	0.93	4.99	1.1	2.56	2.8	204.3	65.9	31	18	30	4.6	2.9	0.9	0.9	25	18	31	22	0.86	0.55	1.56	36.96	65.13	4.95	157.8	7.65	107.765	66.91
881	7.9899	0	female	Uygur	NO	NO	NO	NO	NO	YES	YES	YES	NO	NO	57	175	98	32.0004	119	69	4.11	0.9	2.44	0.85	2.39	5.3	371	107	34	25	34	5.3	3.6	1	1	27	17	37	24	0.73	1.21	0.6	32.08	80.91	5.74	236.146	6.95	108.873	59.78
882	7.9861	0	male	Han	YES	YES	NO	NO	YES	NO	YES	NO	NO	NO	38	176	77	24.858	164	87	3.76	0.98	2.15	1.2	2.13	5	423	79				4.2	3	1	1					1.02	1.63	1.62	28.57	43.58	3.09	157.21	12.93	82.4684	55.46
883	7.9814	0	male	Han	YES	NO	NO	NO	NO	YES	YES	NO	NO	NO	51	140	36	18.368	134	78	4.89	0.75	3.49	1.6	1.6	4.1	326.6	77				4.2	2.8	1	1					0.54	0.87	0.62	33.33	49.03	2.99	157.21	6.59	135.304	62.4
884	7.9813	0	male	Han	NO	YES	NO	NO	NO	NO	NO	NO	NO	NO	56	158	61	24.4358	175	82	3.82	0.96	4.77	1.42	2.64	4.2	263.3	66.4				5.5	3.4	0.8	0.8					0.84	0.54	1.56	38.18	99.98	7.1	185.597	11.6	116.603	67.82
885	7.9777	0	male	Han	NO	YES	NO	YES	YES	NO	YES	YES	YES	NO	49	160	63	24.6097	124	93	4.35	0.84	4.2	1.1	3.3	8.6	220.4	94.4	41	23	42	4.8	3.2	0.9	0.9	28	20	37	31	0.74		0.8	33.33	66.56	4.93	170.38	6.73	105.787	61.9
886	7.9771	0	female	Uygur	NO	NO	NO	YES	NO	YES	NO	YES	YES	NO	52	174	73	24.112	135	65	4.4	0.83	2.93	1.12	4.08	6.7	297.7	84.2	31	17	34	4.8	3.1	1.2	1.2	26	19	36	25	0.66	0.72	0.92	35.42	69.6	5.57	259.562	7.76	140.845	64.73
887	7.9733	0	female	Han	NO	NO	YES	NO	NO	YES	NO	NO	NO	NO	63	169	69	24.1589	140	72	4.28	0.85	4.49	0.79	3.29	10.9	361	74				4.6	3	0.9	0.9					0.55	0.69	0.8	34.78	62.34	4.49	157.8	8.13	89.5982	64.04
888	7.9677	0	male	Han	NO	NO	NO	NO	NO	NO	NO	NO	NO	NO	65	158	65	26.0375	167	76	4.76	0.76	3.78	0.89	3.12	3.6	296.7	57.7	28	18	34	4.9	3.3	0.8	0.8	26	18	32	23	0.55	0.62	0.89	32.65	68.68	5.22	149.655	8.46	91.092	60.88
889	7.9601	0	male	Kazak	YES	NO	YES	YES	YES	NO	NO	NO	NO	NO	54	168	78	27.6369	172	92	4.08	0.88	3.38	1.18	2.91	5.6	190.2	71.3	34	17	40	5.3	3.7	1.4	1.4	29	21	5	25	0.56	0.88	0.64	31.37	72.94	5.25	384.267	9.88	208.06	58.91
890	7.9601	0	male	Kazak	YES	NO	YES	YES	YES	NO	NO	NO	NO	NO	54	168	78	27.6369	172	92	4.08	0.88	4.14	1.18	1.75	5.6	190.2	71.3	34	17	40	5.1	3.5	1.2	1.2	29	21	5	25	0.56	0.88	0.64	31.37	72.94	5.25	287.193	6.92	153.554	58.91
891	7.9577	0	female	Han	NO	NO	NO	NO	YES	NO	YES	NO	NO	NO	57	162	62	23.6249	108	63	4.07	0.88	4.57	1.07	1.81	5.6	266	69	38	21	31	5.4	4	0.8	0.8	30	20	31	19	0.49	0.65	0.75	25.93	71.31	4.85	179.357	6.13	111.381	50.46
892	7.9568	0	male	Uygur	YES	YES	NO	YES	NO	NO	YES	NO	YES	NO	58	157	54	21.908	151	84	4.53	0.79	3.78	1.37	4.19	4.8	192.9	69.6				4.8	3.2	0.9	0.9					0.52	0.69	0.75	33.33	66.56	5.13	170.38	5.1	113.891	61.9
893	7.9521	0	female	Han	NO	NO	YES	YES	NO	NO	NO	YES	YES	NO	59	176	85	27.4408	145	85	4.24	0.84	4.88	0.85	2.83	4.1	406.7	66.1	35	20	36	5.2	3.6	0.9	0.9	31	19	37	25	0.65	0.7	0.93	30.77	75.08	5.11	196.888	6.84	98.0175	57.97
894	7.9503	0	male	Han	NO	YES	NO	NO	NO	NO	NO	YES	NO	NO	56	169	62	21.7087	158	87	4.04	0.88	4.07	1.37	2.85	4.7	185.3	55.6	30	21	34	4.8	3	0.8	0.8	27	20	33	21	0.82	0.67	1.22	37.5	72.52	6.24	144.014	6.33	86.1534	67.45
895	7.9416	1	male	Han	NO	NO	YES	NO	NO	YES	YES	NO	NO	NO	91	175	70	22.8575	209	65	3.56	0.99	5.55	0.94	1.86	5	376.3	73.2	35	22	38	5.3	3.8	1.2	1.2	28	19	35	22	0.89	0.75	1.19	30	67.37	4.78	306.362	7.73	171.19	61.9
896	7.9303	0	female	Other	NO	NO	NO	NO	NO	NO	NO	NO	YES	NO	65	160	50	19.5321	193	88	3.96	0.88	5.14	1.3	2.24	4.8	190	52	36	19	32	4.1	2.7	0.8	0.8	24	15	30	19	0.76	0.98	0.78	34.15	47.2	3.68	107.323	10.13	74.1129	63.59
897	7.9303	0	female	Other	NO	NO	NO	NO	NO	NO	NO	NO	YES	NO	65	160	50	19.5321	193	88	3.96	0.88	5.58	1.3	4.03	4.8	190	52	36	19	32	4.1	2.7	0.8	0.8	24	15	30	19	0.76	0.98	0.78	34.15	47.2	3.68	107.323	10.13	73.3531	63.59
898	7.9263	0	female	Uygur	NO	NO	NO	YES	YES	NO	YES	NO	YES	NO	74	178	80	25.2498	118	83	3.9	0.89	4.49	1.07	2.31	6	300.2	93.6				5	3.3	0.9	0.9					0.54	0.71	0.76	34	74.11	4.59	183.409	10	93.7244	62.68
899	7.924	0	male	Han	NO	NO	NO	YES	NO	NO	YES	NO	NO	NO	67	180	95	29.3216	162	98	4.81	0.72	3.12	0.95	1.03	6.2	146	63				5.6	3.7	1	1					0.51	0.71	0.72	33.93	95.53	6.3	260.294	7.83	120.445	62.17
900	7.9195	0	female	Han	NO	NO	YES	NO	YES	YES	NO	NO	NO	NO	50	167	60	21.5139	181	61	4.42	0.78	4.05	1.1	4.03	4.5	246	56				5	3.2	0.9	0.9					0.9	0.67	1.34	36	77.28	6.57	183.409	8.86	112.259	65.36
901	7.9194	0	female	Han	NO	NO	NO	NO	NO	YES	NO	NO	NO	NO	40	160	78	30.4691	164	96	3.83	0.9	5.25	1.06	3.23	7	331.4	70.5	28	18	27	4.1	2.7	0.8	0.8	27	18	30	20	0.79	1.01	0.78	34.15	47.2	3.59	107.323	2.03	58.9201	63.59
902	7.9186	0	male	Han	NO	NO	YES	NO	NO	YES	NO	YES	YES	NO	74	166	110	39.9188	109	58	3.87	0.89	3.14	0.91	3.01	3.9	313	81	36	23	35	5	3.4	0.9	0.9	30	20	36	25	0.74	0.57	1.3	32	70.8	5.1	183.409	12.93	80.879	59.88
903	7.9183	0	male	Han	YES	YES	NO	NO	NO	YES	NO	YES	YES	NO	72	182	82	24.7559	149	82	4.85	0.71	3.58	1.15	1.15	6.4	227	61	36	20	33	5	3.1	0.9	0.9	28	19	30	20	0.86	0.65	1.32	38	80.32	6.1	183.409	7.17	91.3893	67.93
904	7.9115	0	male	Kazak	YES	NO	NO	YES	NO	YES	NO	YES	NO	NO	44	169	68	23.8096	166	107	3.6	0.95	2.75	1.13	3.36	5.2	502.6	128.2	34	23	32	4.8	3	0.9	0.9	27	20	34	25	0.52	0.75	0.69	37.5	72.52	5.66	170.38	7	97.4492	67.45
905	7.9074	0	female	Han	NO	NO	NO	NO	YES	NO	YES	NO	NO	NO	66	183	94	28.0692	132	77	5.24	0.65	2.32	1.19	2.96	8.1	421	83	36	20	37	5	3.3	0.9	0.9	29	18	36	23	0.65	0.78	0.83	34	74.11	5.78	183.409	7.65	84.653	62.68
906	7.9056	0	male	Uygur	YES	YES	YES	NO	YES	YES	NO	NO	YES	NO	47	177	74	23.6206	146	91	4.25	0.8	2.72	1.19	1.66	7.4	305.1	105.2	32	21	29	4.8	3.1	0.9	0.9	28	17	31	24	0.8	0.44	1.82	35.42	69.6	4.66	170.38	6.67	90.9179	64.73
907	7.9046	0	female	Uygur	YES	NO	YES	YES	YES	YES	NO	NO	NO	NO	68	175	85	27.7556	129	77	4.59	0.74	5.18	1.11	2.58	4.5	213	64	38	23	39	4.9	3.2	1	0.9	29	18	36	26	0.61	0.97	0.63	34.69	71.85	5.96	191.054	7.43	95.4031	63.69
908	7.9041	0	male	Other	YES	YES	NO	NO	YES	NO	YES	NO	NO	NO	56	170	75	25.9525	119	72	3.69	0.92	2.86	1.33	1.83	3.7	383	73	42	24	33	5.2	3.4	1.1	1.1	30	19	30	23	0.92	0.74	1.24	36	77.28	5.26	261.601	10	143.61	65.36
909	7.901	0	male	Other	YES	NO	NO	NO	YES	NO	NO	NO	NO	NO	30	160	62	24.2194	154	82	3.89	0.87	3.92	1.18	3.17	4.7	320	51				4.4	2.8	0.8	0.8					0.86	0.58	1.48	36.36	58.14	4.07	122.449	6.33	75.7399	66.3
910	7.9003	0	male	Uygur	YES	NO	NO	NO	NO	YES	NO	NO	NO	NO	80	175	70	22.8575	148	100	4.57	0.74	3.78	1.06	1.98	3.4	325.7	78.8				4.8	3.2	0.9	0.9					0.89	0.64	1.39	33.33	66.56	5.19	170.38	6.33	94.1015	61.9
911	7.8981	0	male	Han	YES	YES	YES	YES	NO	NO	YES	NO	NO	YES	44	163	62	23.3359	114	70	3.59	0.94	5.39	0.94	3.13	6	348	63	31	20	31	4.8	3.3	1	1	29	19		24	0.77	0.98	0.79	31.25	63.39	4.37	198.394	8.11	121.342	58.69
912	7.8966	0	male	Han	YES	NO	NO	NO	YES	NO	YES	NO	NO	NO	53	150	50	22.2226	151	84	4.32	0.78	3.04	1.54	1.74	4.8	244	66	32	19	29	4.3	2.8	0.9	0.9	28	17	33	23	0.66	0.81	0.81	34.88	53.52	4.07	139.773	8.8	99.6883	64.43
913	7.8933	0	male	Kazak	NO	NO	NO	YES	NO	NO	YES	YES	YES	NO	63	169	69	24.1596	147	71	3.86	0.87	3.04	1.12	1.31	4.7	222	63	32	20	32	5.2	3.4	0.9	0.9	30	19	29	21	0.56	0.72	0.78	34.62	82.07	5.5	196.888	6.59	111.792	63.37
914	7.889	0	female	Other	NO	NO	NO	NO	NO	NO	NO	NO	NO	NO	61	158	53	21.2308	164	94	4.71	0.71	2.98	1.37	2	4.3	249.3	77.2	33	22	35	4.9	3.3	1.1	1.1	30	20	36	25	0.76	0.96	0.79	34.04	64.44	4.77	236.272	10.13	160.359	62.95
915	7.8823	0	female	Han	NO	NO	NO	NO	NO	NO	NO	NO	NO	NO	76	181	96	29.304	177	96	5.11	0.65	3.1	0.81	4.33	4.5	268.1	79.1	36	24	39	5	3.3	0.9	0.9	27	18	35	22	0.48	0.76	0.63	34	74.11	5.26	183.409	2.03	84.1327	62.68
916	7.8799	0	female	Han	NO	NO	NO	NO	NO	NO	YES	YES	NO	NO	60	165	58	21.3046	177	90	4.36	0.76	5.19	1.41	2.52	5	319.6	56.8	27	18	29	4.2	2.8	0.9	0.9	25	16	28	18	0.79	0.53	1.49	33.33	49.03	3.48	133.988	7.52	83.9527	62.4
917	7.8776	0	male	Han	YES	YES	YES	NO	NO	NO	NO	YES	NO	NO	66	165	65	23.8759	140	95	5.51	0.6	5.36	1.27	3.58	4.2	243	56	27	18	30	4.7	3.1	0.8	0.8	24	16	31	17	1.08	0.81	1.33	34.04	64.44	5.35	138.473	9.39	83.112	62.95
918	7.8776	0	male	Han	YES	YES	YES	NO	NO	NO	YES	YES	NO	NO	66	165	65	23.876	140	95	5.51	0.6	2.99	1.27	1.93	4.2	243	56	27	18	30	4.7	3.1	0.8	0.8	24	16	31	17	1.08	0.81	1.33	34.04	64.44	5.35	138.473	9.39	82.1505	62.95
919	7.8712	0	female	Han	NO	NO	NO	YES	NO	NO	NO	NO	YES	NO	78	162	70	26.6737	143	70	4.5	0.73	3.29	1.5	1.19	3.7	201	57	28	19	33	4.9	3.3	10.1	2.8	27	18	33	22	0.89	0.75	1.19	34.04	64.44	4.58	579.387	8.48	349.931	62.95
920	7.8647	0	male	Uygur	NO	NO	NO	YES	NO	YES	NO	YES	YES	NO	59	170	68	23.5296	158	112	4.73	0.69	3.72	1.03	3.38	5.6	344	37				4.9	3.1	0.9	0.9					0.66	0.83	0.8	36.73	74.89	5.24	176.839	6.11	100.791	66.39
921	7.8634	0	male	Han	NO	NO	NO	YES	NO	YES	YES	YES	YES	NO	38	162	65	24.768	120	80	3.79	0.86	4.24	1.07	1.9	5.2	402	77	35	22	39	4.5	3	1	1	28	18	37	23	0.78	0.88	0.89	33.33	57.45	4.19	177.24	7.09	106.304	62.14
922	7.8596	0	male	Han	NO	NO	NO	NO	YES	NO	YES	NO	NO	NO	32	165	67	24.6097	122	77	4.51	0.72	7.34	1.43	2.53	5.2	252	62				4.3	2.7	0.8	0.8					0.75	0.62	1.21	37.21	56.05	4.04	117.307	7.19	68.5524	67.47
923	7.8521	0	male	Other	YES	YES	NO	NO	NO	NO	NO	NO	NO	NO	39	175	60	19.5926	167	99	4.81	0.67	2.73	1.33	2.59	5.3	252.5	58	26	16	39	4.5	2.8	1	1	23	16	32	18	1.15	1.3	0.88	37.78	62.9	5.41	177.24	6.11	105.337	68.04
924	7.8474	0	male	Han	NO	NO	YES	YES	NO	YES	YES	NO	YES	NO	70	173	71	23.7238	143	72	4.86	0.66	2.4	0.98	2.13	3.4	189.9	74.1				4.8	3.2	0.9	0.9					1.07	0.65	1.65	33.33	66.56	4.66	170.38	10	94.0703	61.9
925	7.8434	0	female	Kazak	NO	NO	NO	NO	NO	YES	YES	NO	NO	NO	69	174	71	23.4517	169	82	3.26	0.98	3.76	1.13	3.42	4.4	321	43	32	20	41	4.6	3.1	1	0.8	30	21	36	27	1.05	1.26	0.83	32.61	59.42	3.92	157.8	7.78	86.8323	61.04
926	7.8374	0	female	Kazak	NO	NO	NO	YES	NO	YES	NO	NO	NO	NO	52	175	83	27.1025	151	84	4.02	0.79	3.4	0.84	2.3	7.4	237.5	83.8	30	20	40	5	3.3	1.3	1.2	31	19	32	24	0.81	0.54	1.5	34	74.11	5.78	295.15	9	149.292	62.68
927	7.8301	0	male	Uygur	YES	YES	YES	YES	YES	YES	NO	NO	YES	NO	65	190	108	29.9175	141	86	2.79	1.13	2.05	0.6	3.08	4.4	431.7	99.9	34	20	38	5.5	3.4	1	1	30	13	34	23	0.91	0.7	1.3	38.18	99.98	6.4	252.12	7.58	105.556	67.82
928	7.8258	0	male	Han	YES	YES	NO	NO	NO	YES	YES	NO	NO	NO	50	173	70	23.3894	144	98	4.36	0.72	4.11	1	3.53	4.9	368	63	33	18	35	5.2	3.2	1	0.9	31	17	31	24	0.67	0.94	0.71	38.46	88.55	7.7	212.395	7.04	119.498	68.37
929	7.8255	0	female	Other	NO	NO	NO	NO	YES	YES	NO	NO	NO	NO	60	168	56	19.8417	111	47	4.42	0.71	3.75	1.32	1.64	5	267	69	28	17	28	4.4	2.9	0.9	0.9	23	18	34	22	0.77	0.59	1.31	34.09	55.48	4.6	145.67	6.93	92.6711	63.27
930	7.8228	0	female	Han	NO	NO	NO	YES	YES	NO	NO	YES	YES	NO	57	163	67	25.2181	129	79	4.89	0.64	4.15	1.36	3.05	2.4	242	48	30	20	34	4.8	3.2	0.9	0.9	27	18	32	23	0.85	0.62	1.37	33.33	66.56	5.32	170.38	7.19	100.283	61.9
931	7.8208	0	female	Uygur	NO	NO	YES	YES	YES	YES	NO	YES	NO	NO	57	160	49	19.1414	142	65	4.11	0.76	4.06	1.36	2.13	7.6	118.5	58.7	27	15	29	4.3	2.7	0.8	0.8	22	16	30	20	0.71	0.6	1.18	37.21	56.05	4.32	117.307	5.92	80.8846	67.47
932	7.8207	0	female	Han	NO	NO	NO	NO	NO	YES	NO	NO	NO	NO	59	178	96	30.2992	138	59	5.12	0.61	3.42	1.28	2.34	2.4	144	49	30	20	36	4	2.6	0.8	0.8	26	17	34	22	0.63	0.83	0.76	35	45.39	3.86	102.481	8.4	47.4074	64.84
933	7.8184	0	male	Han	YES	YES	NO	NO	YES	YES	NO	NO	NO	NO	52	155	70	29.1369	143	90	4.1	0.76	3.37	1.09	1.46	9.4	310.4	83.9	29	20	41	4.5	3.1	0.9	0.8	31	21	35	34	0.56		0.67	31.11	54.53	3.54	139.491	6.62	83.6478	58.98
934	7.8046	0	male	Han	YES	YES	NO	YES	NO	YES	YES	NO	NO	NO	59	157	59	23.9366	151	93	3.94	0.78	3.38	1.19	2.22	3.8	246.6	70.9	27	18	31	4.8	3.2	0.9	0.9	28	17	33	22	0.86	0.65	1.32	33.33	66.56	5.06	170.38	6.93	109.218	61.9
935	7.8045	0	male	Han	YES	YES	NO	NO	YES	NO	NO	YES	YES	NO	58	175	63	20.5722	145	76	4.39	0.7	2.93	0.97	2.73	3.1	217	44	32	21	32	4.7	3.2	1.5	1.4	28	17	33	23	0.79	0.57	1.39	33.33	57.45	4.19	334.959	8.32	196.792	62.14
936	7.8025	0	female	Han	NO	NO	NO	NO	YES	NO	YES	NO	YES	NO	73	167	61	21.8732	130	70	4.51	0.68	4.46	1.12	1.71	5.9	401.3	115.9	30	20	31	4.4	3	1.1	1.1	27	18	30	22	0.89	0.58	1.53	34.33	49.03	3.48	196.804	8.67	120.865	62.4
937	7.8025	0	female	Han	NO	NO	NO	NO	YES	NO	YES	NO	YES	NO	73	167	61	21.8729	130	70	4.51	0.68	3.38	1.12	3.58	5.9	401.3	115.9	30	20	31	4.2	2.8	0.9	0.9	27	18	30	22	0.89	0.58	1.53	34.33	49.03	3.48	133.988	8.13	81.3728	62.4
938	7.8012	0	male	Han	YES	YES	NO	NO	YES	YES	NO	NO	NO	NO	47	171	77	26.333	140	92	4.03	0.76	3.37	1.25	2.93	3.7	284	94	31	21	35	4.5	2.8	0.9	0.8	27	18	32	24	0.68	0.53	1.28	37.78	62.9	4.78	139.491	8.4	74.3635	68.04
939	7.7958	0	female	Uygur	NO	NO	YES	YES	NO	NO	YES	NO	NO	NO	56	162	80	30.4833	118	67	4.76	0.64	2.61	1.3	3.1	7	416.7	58.4	40	22	38	5.2	3.5	1.4	1.4	29	20	33	22	0.79	1.03	0.77	34	74.11	5.26	372.648	10.53	203.045	62.68
940	7.7923	0	female	Han	NO	NO	NO	YES	NO	NO	NO	NO	NO	NO	78	159	78	30.854	121	62	3.53	0.86	5.14	1.5	1.89	4.2	173	57	32	21	35	4.7	3.3	0.9	0.8	27	18	33	24	0.62	0.78	0.79	19.79	58.23	4.48	151.054	8.86	83.2069	56.89
941	7.7895	0	male	Other	NO	NO	YES	YES	YES	YES	YES	NO	YES	YES	51	170	85	29.4126	144	79	3.44	0.88	3.14	0.88	3	3.5	216	70	34	20	39	5.2	3.5	1	0.9	32	21	35	25	0.48	0.67	0.72	32.69	78.64	6.29	212.395	6.4	107.7	60.72
942	7.7854	0	male	Han	NO	NO	NO	NO	NO	NO	NO	NO	NO	NO	51	175	60	19.5926	120	80	4.02	0.75	2.73	1.19	3.29	3.5	317	42	26	18	35	5.2	3.4	0.9	0.9	27	18	32	22	0.93	0.72	1.29	34.62	82.07	6.4	196.888	7.75	117.014	63.37
943	7.7807	0	female	Han	NO	NO	NO	YES	YES	NO	YES	NO	NO	NO	52	165	60	22.0386	150	54	4.84	0.62	2.33	1.64	2.22	8	410.7	75.5	38	24	50	5.3	3.2	1	1	32	22	35	25	0.67	1.1	0.61	39.62	94.38	6.42	236.146	8.14	145.625	69.74
944	7.7801	0	male	Uygur	YES	YES	NO	YES	YES	NO	NO	NO	NO	NO	39	167	94	33.7057	115	76	3.06	0.98	2.21	0.85	1.48	7.3	310.3	91.5	39	20	39	5.1	3.4	1	1	31	20	35	23	0.67	0.88	0.76	33.33	76.37	5.5	220.67	5.36	106.656	61.68
945	7.7744	0	male	Han	NO	NO	NO	YES	NO	YES	NO	NO	YES	NO	77	170	63	21.7996	148	95	4.26	0.7	6.88	1.3	2.2	4.8	233	47	34	20	34	4.6	3	0.9	0.9	26	16	35	21	0.85	0.79	1.08	34.78	62.34	4.49	157.8	7.39	93.3454	64.04
946	7.7674	0	female	Han	NO	NO	YES	YES	NO	NO	YES	YES	YES	NO	79	170	78	26.9903	147	70	4.23	0.7	3.96	0.71	1.99	6.9	320	74	39	24	34	5.4	3.9	0.9	0.9	33	22	36	24	0.5	0.6	0.83	27.78	75.4	5.73	210.815	6.25	111.987	53.36
947	7.7664	0	male	Uygur	YES	YES	NO	NO	NO	NO	NO	NO	YES	NO	59	170	68	23.5304	125	65	4.35	0.68	3.26	0.84	2.17	7.8	477	92	32	20	32	4.9	3.3	1.1	1	30	20	31	22	0.57	1.02	0.58	34.04	64.44	4.9	220.765	6.71	127.308	62.95
948	7.766	0	male	Uygur	NO	NO	NO	YES	NO	YES	YES	NO	YES	YES	59	160	91	35.5476	148	78	4.62	0.64	4.07	0.98	1.78	8.1	380	109	33	20	35	4.8	3.2	1	1	26	16	33	25	0.64	1.2	0.53	33.33	66.56	4.66	198.394	8.53	101.19	61.9
949	7.7637	0	male	Han	YES	YES	YES	YES	YES	YES	NO	YES	YES	NO	62	175	60	19.5925	120	80	4.47	0.66	3.89	1.32	2.95	4.9	357.6	75.3				4.7	2.8	1	1					0.65	0.85	0.76	40.43	72.81	5.39	191.218	6.67	113.644	71.13
950	7.7625	0	male	Han	NO	NO	YES	YES	NO	NO	YES	NO	NO	NO	79	169	68	23.8089	122	83	3.55	0.83	3.8	0.89	2.32	6.56	416.66	82.53	35	22	36	4.6	3	1	1	31	20	35	24	0.52	0.75	0.69	34.78	62.34	4.8	184.166	6.5	105.334	64.04
951	7.762	0	female	Han	NO	NO	NO	YES	YES	YES	NO	NO	NO	NO	72	170	72	24.9141	125	83	3.98	0.74	3.37	1.02	1.85	4.5	315.5	81.6	39	20	33	4.6	3.1	0.9	0.9	29	20	31	23	0.8	0.55	1.45	32.61	59.42	4.16	157.8	10	87.3901	61.04
952	7.7489	0	male	Han	NO	YES	NO	NO	YES	NO	NO	NO	NO	NO	45	175	103	33.6329	163	88	3.38	0.86	3.74	0.95	3.45	6	406.9	116.4	35	18	33	4.9	3.2	0.9	0.9	28	18	35	25	0.72	0.88	0.82	34.69	71.85	5.39	176.839	10.29	80.3045	63.69
953	7.7463	0	male	Han	NO	NO	NO	NO	YES	NO	NO	NO	NO	NO	18	174	77	25.4335	150	80	4.53	0.64	4.04	1.33	2.67	5.5	289	75				4.8	3.2	1	1					0.65	0.72	0.9	33.33	66.56	5.13	198.394	6.33	104.743	61.9
954	7.7441	0	male	Han	YES	YES	NO	NO	YES	NO	NO	NO	NO	NO	24	155	56	23.3099	134	68	4.52	0.64	3.94	1.42	1.86	4.7	283.6	67.9	30	18	30	4.5	2.9	0.8	0.8	24	17	31	19	0.94	1.03	0.91	36	60	4.16	127.69	7.75	85.5489	65
955	7.7437	0	female	Kazak	NO	NO	NO	NO	NO	YES	YES	NO	NO	NO	61	178	98	30.9307	126	73	4.59	0.63	3.17	0.94	1.83	4.5	312.2	71.5	39	22	38	5.4	3.4	1.2	1.2	29	21	36	25	1.06	0.75	1.41	37.04	93.87	7.42	316.172	9.64	144.549	66.43
956	7.7423	0	male	Han	NO	NO	NO	NO	NO	NO	YES	NO	NO	NO	75	160	40	15.6257	164	97	4.31	0.67	4.82	1.83	3.14	5.1	258	40	26	16	25	4.8	3.2	0.8	0.8	25	15	27	19	0.63	0.92	0.68	33.33	66.56	5.19	144.014	8.4	108.846	61.9
957	7.7371	0	male	Han	YES	YES	NO	NO	YES	YES	YES	YES	YES	NO	47	165	100	36.7313	141	90	4.56	0.63	2.36	1.5	2.03	4.9	289	57	35	22	41	5	3.5	0.9	0.9	32	20	36	25	0.62	0.71	0.87	30	67.37	5.46	183.409	7.67	87.1883	56.98
958	7.7239	0	female	Han	NO	NO	NO	NO	YES	NO	NO	NO	NO	NO	30	175	60	19.5922	140	70	4.5	0.63	4.68	1.2	3.07	6.1	291.6	67.3	32	20	32	4.2	2.6	0.9	0.9	30	20	32	20	0.57	0.88	0.65	38.1	53.97	4.16	133.988	6.33	79.6318	68.68
959	7.7073	0	female	Han	NO	NO	NO	YES	YES	YES	NO	YES	NO	NO	59	170	60	20.7622	136	78	4.29	0.65	4.36	1.9	2.24	4.7	214	51	29	16	35	5.2	3.5	1.1	1.1	25	17	32	22	0.74	0.85	0.87	34	74.11	5.93	261.601	6.43	160.089	62.68
960	7.7023	0	female	Han	NO	NO	NO	NO	YES	NO	NO	NO	NO	NO	35	175	72	23.5108	133	76	4.08	0.68	5.41	0.78	3.26	4.5	304	71	37	17	37	5	3.3	0.9	0.9	31	21	35	24	0.76	0.56	1.36	34	74.11	5.78	183.409	6.61	99.8852	62.68
961	7.6833	0	female	Kazak	NO	NO	NO	NO	NO	NO	YES	NO	NO	NO	55	175	88	28.7353	132	85	6.98	0.39	3.06	0.89	1.58	7.14	286.67	61.8	34	20	33	4.9	3.2	1	1	24	17	32	24	1.11	0.7	1.59	34.69	71.85	5.1	205.694	7.66	100.781	63.69
962	7.6724	0	male	Han	NO	NO	NO	NO	YES	NO	YES	NO	NO	NO	64	170	70	24.2223	147	89	3.96	0.68	3.49	1.23	2.18	4.7	374	68	34	22	30	4.9	3.2	0.9	0.9	27	18	32	20	0.8	0.6	1.33	34.69	71.85	5.32	176.839	6.96	99.3419	63.69
963	7.665	0	male	Han	YES	NO	NO	NO	YES	YES	NO	YES	NO	NO	33	165	70	25.7119	157	65	4.05	0.66	4.88	1.25	1.08	6.9	265	56	30	19	42	4.7	3.2	1	1	27	18	36	24	0.62	0.78	0.79	31.91	61.4	4.85	191.218	6.53	109.292	59.98
964	7.6575	0	female	Han	NO	NO	YES	YES	NO	NO	NO	NO	NO	NO	76	173	82	27.3985	169	95	3.79	0.7	4.28	0.98	2.4	4.7	501.4	95.8	32	26	33	4.9	3.3	1.1	1.1	29	16	37	23	0.6	0.76	0.79	34.04	64.44	5.8	236.272	6.67	122.586	62.95
965	7.6287	0	male	Han	NO	YES	NO	NO	NO	YES	NO	NO	NO	NO	60	170	77	26.6445	137	76	3.58	0.72	5.25	0.96	3.08	4.2	305	56				5.3	3.4	1	0.9					0.86	0.103	0.83	35.85	87.9	5.98	219.746	5.89	117.53	64.94
966	7.6219	0	male	Kazak	NO	NO	NO	NO	YES	YES	YES	NO	NO	NO	62	170	86	29.7579	148	75	3.2	0.8	2.36	0.77	2.24	3.1	313.4	64.9	39	25	40	5.5	3.9	1.4	1.4	31	20	35	24	0.44	0.81	0.54	30.19	77.21	6.02	408.028	4	208.273	57.05
967	7.6219	0	male	Kazak	NO	NO	NO	NO	YES	YES	YES	NO	NO	NO	62	170	86	29.7583	148	75	3.2	0.8	4.43	0.77	1.21	3.1	313.4	64.9	39	25	40	5.3	3.7	1.2	1.2	31	20	35	24	0.44	0.81	0.54	30.19	77.21	6.02	306.362	4	154.346	57.05
968	7.5981	0	male	Han	YES	YES	NO	NO	YES	NO	YES	NO	NO	NO	48	165	65	23.8756	145	62	4.31	0.58	5.78	0.6	1.77	2.9	563.9	75.4	44	23	41	5.3	3.5	1	0.9	30	20	36	26	0.56	0.8	0.7	33.96	84.47	6.17	219.746	7	131.892	62.41
969	7.5945	0	male	Han	YES	YES	YES	NO	NO	NO	YES	NO	NO	NO	62	160	60	23.4376	137	70	4.37	0.57	4.54	1.01	0.81	4.8	236.7	61.3	35	22	34	5	3.3	0.9	0.9	27	15	33	22	0.69	0.87	0.79	34	74.11	4.97	183.409	7.67	115.272	62.68
970	7.5939	0	male	Uygur	NO	NO	NO	YES	NO	NO	YES	NO	NO	NO	54	174	79	26.0937	153	107	4.61	0.54	5.19	1.09	3.19	8.2	428.6	110.1				5.7	3.8	0.9	0.9					0.53	0.81	0.65	33.33	98.09	6.38	232.549	7.62	121.138	61.29
971	7.56	0	male	Han	YES	NO	NO	NO	YES	NO	NO	NO	NO	NO	43	155	77	32.0503	129	79	3.76	0.64	5.16	1.14	2.68	5	268	48	30	20	33	4.8	3.1	0.9	0.9	28	19	34	24	0.62	0.78	0.79	35.42	69.6	5.5	170.38	6.53	95.8161	64.73
972	7.5505	0	male	Han	YES	YES	NO	NO	NO	NO	NO	YES	NO	NO	65	150	60	26.6673	121	85	4.04	0.59	2.96	1.34	3.59	5.2	266.3	60.1				4.4	2.9	0.9	0.9					0.52	0.68	0.76	34.09	55.48	3.99	145.67	10	95.2028	63.27
973	7.5493	0	female	Han	NO	NO	NO	NO	NO	YES	NO	NO	NO	NO	81	160	72	28.125	132	75	3.84	0.62	2.82	1.11	2.15	4.7	178.4	59.3	30	19	33	4.5	3	0.9	0.9	27	18	32	19	1.05	0.82	1.28	33.33	57.45	4.48	151.679	8.75	86.9369	62.14
974	7.5305	0	male	Han	YES	YES	NO	NO	NO	NO	YES	YES	NO	NO	49	175	110	35.9192	195	99	5.31	0.44	4.11	0.95	1.06	8.4	317.1	65.9	28	17	35	5.4	3.7	1	1	22	16	32	20	1.4	0.54	2.59	31.48	83.18	4.57	244.07	8.29	106.6	58.86
975	7.5304	0	male	Han	NO	NO	NO	NO	NO	NO	NO	NO	NO	NO	62	155	47	19.5633	148	81	3.83	0.61	3.58	1.7	2.63	10.6	110	46				4.5	3	0.9	0.9					0.85	0.62	1.37	33.33	57.45	4.48	151.679	10.13	108.793	62.14
976	7.5264	0	male	Other	YES	YES	NO	NO	NO	NO	NO	NO	NO	NO	46	168	65	23.0305	152	102	3.58	0.65	2.8	1.69	3.01	4.1	315	48	32	17	36	4.3	2.7	0.8	0.8	24	15	30	23	0.43	0.88	0.49	37.21	56.05	4.2	117.307	10	69.6431	67.47
977	7.5254	0	female	Han	NO	NO	YES	NO	NO	YES	NO	YES	YES	NO	64	170	73	25.26	149	85	3.69	0.63	3.45	0.83	2.78	5.6	255.1	80.8	33	23	33	5.3	3.8	0.9	0.9	26	16	35	23	0.52	0.7	0.74	28.3	73.39	5.36	203.795	6.93	113.434	54.23
978	7.5254	0	female	Han	NO	NO	YES	NO	NO	YES	NO	YES	YES	NO	64	170	73	25.2603	149	85	3.69	0.63	2.8	0.83	3.07	5.6	255.1	80.8	33	23	33	5.3	3.8	0.9	0.9	26	16	35	23	0.52	0.7	0.74	28.3	73.39	5.36	203.795	6.93	112.068	54.23
979	7.5031	0	male	Han	NO	NO	NO	YES	NO	NO	YES	NO	YES	NO	66	159	48	18.9874	169	90	4.21	0.54	3.01	1.81	1.6	5	249.7	64.1	27	16	31	4.6	3.1	0.9	0.8	26	16	30	20	1.06	0.77	1.38	32.61	59.42	4.75	145.219	9.64	101.453	61.04
980	7.4963	0	male	Han	NO	NO	NO	YES	NO	NO	YES	NO	YES	NO	79	168	58	20.5504	113	51	3.37	0.67	3.01	1.38	1.62	6.4	293	63	35	22	50	4.6	3	0.9	0.9	29	20	45	30				34.78	62.34	4.49	157.8	2.03	97.7515	64.04
981	7.4908	0	female	Han	NO	NO	YES	YES	YES	YES	NO	NO	YES	NO	65	168	70	24.8017	152	83	4.01	0.56	5.55	1.45	3.39	5.2	225.1	61.8	29	18	29	4.9	3.1	0.9	0.9	25	19	28	23	0.75	0.46	1.63	36.73	76.89	5.69	176.839	7	100.028	66.39
982	7.4546	0	male	Han	NO	YES	NO	NO	YES	NO	YES	NO	NO	NO	46	168	70	24.8017	119	80	4.42	0.49	5.09	1.62	2.89	4.7	268	52	30	19	32	5.3	3.5	0.9	0.9	31	20	31	20	0.56	0.74	0.76	33.96	84.47	5.91	203.795	6.59	115.275	62.41
983	7.4292	0	male	Han	NO	NO	NO	NO	YES	NO	YES	NO	NO	NO	48	160	83	32.4219	156	93	5.15	0.41	4.32	1.28	2.67	4.7	197.4	60.4	36	20	33	5.2	3.3	0.8	0.8	31	15	32	27	0.65	0.9	0.72	36.54	85.38	7.34	167.177	7.22	88.6645	65.93
984	7.4189	0	male	Han	YES	YES	YES	YES	NO	YES	YES	YES	YES	NO	52	168	64	22.6763	126	76	3.87	0.54	2.91	1	1.63	6.6	390.4	83.3	29	18	31	4.9	3.3	1	1	26	17	36	23	0.82	0.54	1.52	32.65	68.68	5.63	205.694	6.56	121.633	60.88
985	7.4131	0	male	Han	NO	NO	NO	NO	YES	YES	NO	YES	NO	NO	75	186	72	20.8119	151	92	3.71	0.56	3.69	1.28	2.28	6.2	334	66	32	19	34	4.3	2.8	1	1	25	18	32	25	0.74	0.66	1.12	34.88	53.52	4.23	163.762	5.1	86.0409	64.43
986	7.3771	0	male	Han	YES	YES	NO	YES	NO	NO	NO	NO	YES	NO	56	172	67	22.6474	153	100	3.93	0.51	4.68	1.51	2.17	4	178	59.9	30	20	30	5.3	3.6	0.9	0.9	27	18	32	22	0.51	0.82	0.62	32.08	80.91	5.74	203.795	6.8	116.195	59.78
987	7.3558	0	male	Han	NO	NO	NO	NO	YES	NO	YES	NO	NO	NO	38	176	73	23.5676	149	100	4.36	0.45	3.59	0.76	1.4	4.4	303	61	36	23	32	4.7	3.1	0.9	0.9	27	17	30	22	0.88	0.57	1.54	34.04	64.44	4.58	164.034	8.38	88.4233	62.95
988	7.2634	0	male	Uygur	YES	NO	NO	NO	YES	NO	NO	NO	NO	NO	61	154	35	14.7583	135	73	4.16	0.43	5.51	1.07	1.44	5.9	232.1	70.9	32	20	48	4.2	2.6	0.8	0.8	24	20	53	29	0.86		0.65	38.1	53.97	3.35	112.265	12.93	91.7197	68.68
989	7.0869	0	female	Other	NO	NO	NO	NO	YES	NO	NO	NO	NO	NO	50	175	70	22.8577	209	65	3.06	0.49	5.45	0.94	1.83	5	376.3	73.2	35	22	38	5	3.5	0.9	0.9	28	19	35	22	0.89	0.75	1.19	30	67.37	4.78	183.409	8.29	102.486	56.98
990	7.0173	0	female	Han	NO	NO	YES	YES	NO	YES	NO	NO	YES	NO	75	154	55	23.1916	167	97	3.33	0.42	5.09	1.11	3.2	4.9	239.6	51.5	28	18	31	4.8	3.2	1	0.9	29	20	32	22	0.86	0.65	1.32	33.33	66.56	5.72	184.178	6.37	123.568	61.9
991	7.0083	0	female	Uygur	NO	NO	NO	NO	NO	YES	YES	YES	YES	NO	53	196	80	20.8256	129	75	3.96	0.35	2.96	1.58	1.57	6.1	321	55	33	24	34	5	3.2	0.9	0.9	28	22	33	22	0.84	0.69	1.22	36	77.26	5.95	183.409	7	88.745	65.36
992	6.7401	0	male	Uygur	YES	YES	NO	NO	YES	NO	YES	YES	YES	NO	51	170	92	31.8346	161	88	5.3	0.2	3.69	1.16	2.17	7.9	345.1	72.3	40	25	36	5.2	3.4	0.9	0.9	30	20	34	23	0.56	0.76	0.74	34.62	82.07	6.4	196.888	8	95.4977	63.37
[truncated: 1 more columns]
